# Supplementary material for: Revolutionizing ORR catalyst design through computational methodologies and materials informatics
Source: Royal Society of Chemistry journal article supplement (doi:10.1039/d4ey00104d), 2024-01-01
Supplement: d4ey00104d1.pdf [file d4ey00104d1.pdf]

## Supplementary Information - Revolutionizing ORR Catalyst Design through Computational Methodologies and Materials Informatics

Lanna E. B. Lucchetti<sup>1</sup>, James M. de Almeida<sup>2</sup>, Samira Siahrostami\*<sup>1</sup>

<sup>1</sup> Department of Chemistry, Simon Fraser University, 8888 University Drive, Burnaby, B.C. V5A 1S6, Canada

<sup>2</sup> Ilum School of Science, Brazilian Center for Research in Energy and Materials (CNPEM), Zip Code 13083-970, Campinas, São Paulo, Brazil.

\* Corresponding author: samira\_siahrostami@sfu.ca

**Table 1:** Total energies and adsorption free energies of oxygen reduction reaction intermediate species on different transition metal nitride (TMN) surfaces selected for this work.

| TMN                                  | $E_{(*)}$ (eV) | $E_{\text{-OOH}}$ (eV) | $\Delta G_{\text{-OOH}}$ | $E_{\text{-O}}$ (eV) | $\Delta G_{\text{-O}}$ | $E_{\text{-OH}}$ (eV) | $\Delta G_{\text{-OH}}$ |
|--------------------------------------|----------------|------------------------|--------------------------|----------------------|------------------------|-----------------------|-------------------------|
| Co <sub>2</sub> N (110)              | -171.80        | -186.08                | 4.02                     | -176.91              | 2.36                   | -182.00               | 0.65                    |
| Co <sub>3</sub> N (110)              | -225.35        | -239.18                | 4.47                     | -229.76              | 3.05                   | -234.77               | 1.43                    |
| CoN (100)                            | -239.19        | -253.32                | 4.16                     | -245.43              | 1.21                   | -248.91               | 1.12                    |
| ReN <sub>2</sub> (110)               | -439.40        | -455.89                | 1.81                     | -445.11              | 1.74                   | -448.37               | 1.87                    |
| ReN <sub>2</sub> (100)               | -222.95        | -237.76                | 3.49                     | -228.25              | 2.16                   | -232.20               | 1.59                    |
| ReN <sub>2</sub> (110)               | -219.68        | -231.90                | 6.08                     | -223.07              | 4.07                   | -227.47               | 3.06                    |
| Ta <sub>4</sub> N <sub>5</sub> (100) | -376.79        | -393.39                | 1.70                     | -382.63              | 1.62                   | -386.09               | 1.54                    |
| Ta <sub>4</sub> N <sub>5</sub> (110) | -379.51        | -396.42                | 1.39                     | -383.72              | 3.25                   | -387.13               | 3.22                    |
| Ni <sub>3</sub> N (110)              | -189.05        | -205.28                | 2.07                     | -195.35              | 1.16                   | -198.80               | 1.09                    |
| Fe <sub>3</sub> N (110)              | -256.51        | -274.53                | 0.28                     | -263.42              | 0.55                   | -267.05               | 0.31                    |
| Cr <sub>3</sub> N <sub>2</sub> (110) | -331.71        | -349.50                | 0.51                     | -336.88              | 2.28                   | -339.81               | 2.73                    |
| Cr <sub>2</sub> N (110)              | -330.04        | -343.79                | 4.55                     | -335.50              | 2.00                   | -339.40               | 1.49                    |
| MnN (100)                            | -282.00        | -296.00                | 4.29                     | -287.32              | 2.13                   | -291.65               | 1.19                    |
| Nb <sub>4</sub> N <sub>5</sub> (100) | -344.47        | -358.62                | 4.15                     | -350.35              | 1.58                   | -353.94               | 1.37                    |

XYZ Coordinates of DFT optimized output files of pristine TMN surfaces and oxygen reduction reaction intermediate species adsorption on different TMN surfaces selected for this work as listed in Table 1 above.

Co<sub>2</sub>N (110) - Surface

Co N

```

1.0000000000000000
 4.5225900000000001  0.0000000000000000  0.0000000000000000
 0.0000000000000000  5.1302700000000003  0.0000000000000000
 0.0000000000000000  0.0000000000000000  28.2963999999999984
  
```

Co N

16 8

Selective dynamics

Direct

```

0.1762400000000000  0.6618899999999996  0.01127000000000032  F F F
0.1762400000000000  0.35871999999999982  0.09461000000000030  F F F
0.8237600000000000  0.67851000000000028  0.13284999999999977  F F F
0.8237600000000000  0.98167999999999972  0.04952000000000011  F F F
0.6762400000000000  0.48167999999999972  0.04952000000000011  F F F
0.6762400000000000  0.17851000000000028  0.13284999999999977  F F F
0.3237600000000000  0.16188999999999996  0.01127000000000032  F F F
0.3237600000000000  0.85871999999999982  0.09461000000000030  F F F
0.1948070208851711  0.0720173292094844  0.1805973476788665  T T T
0.1997946110729193  0.7856626985407047  0.2689117382197175  T T T
0.7892100835392438  0.0552498528873082  0.2971126575434176  T T T
0.8031442439296477  0.3609301699001694  0.2152536966525954  T T T
0.6968513176383098  0.8609327461430699  0.2152524925266610  T T T
0.7107564840541433  0.5552139132099218  0.2971120233389039  T T T
0.3051963419992098  0.5720230108330938  0.1805976097640255  T T T
0.3002124745083504  0.2856625079702546  0.2689135666458114  T T T
0.5000000000000000  0.86701999999999966  0.15538999999999970  F F F
0.5000000000000000  0.17020000000000012  0.07206000000000005  F F F
0.0000000000000000  0.67020000000000012  0.07206000000000005  F F F
0.0000000000000000  0.36701999999999966  0.15538999999999970  F F F
0.5341798528656750  0.2748253925649381  0.3206893546539740  T T T
0.4910596352972943  0.5707104424352100  0.2396328222310840  T T T
0.0089368073320335  0.0707129377203531  0.2396322416109238  T T T
0.9658330800500214  0.7748239585806507  0.3206924786254066  T T T
  
```

Co<sub>2</sub>N (110) + \*OOH

Co N O H

1.0000000000000000

4.5225900000000001 0.0000000000000000 0.0000000000000000  
0.0000000000000000 5.1302700000000003 0.0000000000000000  
0.0000000000000000 0.0000000000000000 28.2963999999999984

Co N O H

16 8 2 1

Selective dynamics

Direct

0.1762400000000000 0.6618899999999996 0.0112700000000032 F F F  
0.1762400000000000 0.3587199999999982 0.0946100000000030 F F F  
0.8237600000000000 0.6785100000000028 0.1328499999999977 F F F  
0.8237600000000000 0.9816799999999972 0.0495200000000011 F F F  
0.6762400000000000 0.4816799999999972 0.0495200000000011 F F F  
0.6762400000000000 0.1785100000000028 0.1328499999999977 F F F  
0.2695829646028774 0.1539225459224322 0.0175097212968636 T T T  
0.3237600000000000 0.8587199999999982 0.0946100000000030 F F F  
0.1888138896800081 0.0682025930824495 0.1806792758302969 T T T  
0.1962328492895079 0.7596807608810557 0.2700865525191341 T T T  
0.7863673543288781 0.0332564268289710 0.2945935454509129 T T T  
0.8157775260053596 0.3687130693371350 0.2165423049027483 T T T  
0.6943172504207381 0.8653532153745431 0.2144257892512861 T T T  
0.6044571222077987 0.5805107360437497 0.3362930109299797 T T T  
0.3112267466586867 0.5675065761223574 0.1793704522353816 T T T  
0.3391839544220815 0.2778287687448783 0.2659540272060583 T T T  
0.5000000000000000 0.8670199999999966 0.1553899999999970 F F F  
0.5000000000000000 0.1702000000000012 0.0720600000000005 F F F  
0.0000000000000000 0.6702000000000012 0.0720600000000005 F F F  
0.0000000000000000 0.3670199999999966 0.1553899999999970 F F F  
0.5439273537474505 0.2570802105103279 0.3202614084180309 T T T  
0.4932928044750619 0.5719359425199638 0.2372551573788339 T T T  
0.0207323088907422 0.0707280315286156 0.2413298621249615 T T T  
0.9227568905335921 0.7349432960208375 0.3164484844296857 T T T  
0.5965253627684614 0.5485072544949705 0.3992604166780954 T T T  
0.5538501686795414 0.8175568377961756 0.4124475408596878 T T T  
0.7553157546889244 0.8714526365394648 0.4214181609850406 T T T

Co<sub>2</sub>N (110) + \*O

Co N O

1.0000000000000000

4.5225900000000001 0.0000000000000000 0.0000000000000000  
0.0000000000000000 5.1302700000000003 0.0000000000000000

0.0000000000000000 0.0000000000000000 28.296399999999984

Co N O  
16 8 1

Selective dynamics

Direct

|                    |                    |                    |   |   |   |
|--------------------|--------------------|--------------------|---|---|---|
| 0.1762400000000000 | 0.6618899999999996 | 0.0112700000000032 | F | F | F |
| 0.1762400000000000 | 0.3587199999999982 | 0.0946100000000030 | F | F | F |
| 0.8237600000000000 | 0.6785100000000028 | 0.1328499999999977 | F | F | F |
| 0.8237600000000000 | 0.9816799999999972 | 0.0495200000000011 | F | F | F |
| 0.6762400000000000 | 0.4816799999999972 | 0.0495200000000011 | F | F | F |
| 0.6762400000000000 | 0.1785100000000028 | 0.1328499999999977 | F | F | F |
| 0.2691272069956003 | 0.1540387379490376 | 0.0175068372628590 | T | T | T |
| 0.3237600000000000 | 0.8587199999999982 | 0.0946100000000030 | F | F | F |
| 0.1916144012649113 | 0.0709182842167129 | 0.1810362484549352 | T | T | T |
| 0.1711689106841540 | 0.7534340311061735 | 0.2606810056002885 | T | T | T |
| 0.8338740017257255 | 0.0413718127260915 | 0.3002543188114144 | T | T | T |
| 0.8048736455377739 | 0.3660704021665666 | 0.2148501209635349 | T | T | T |
| 0.6846175900517514 | 0.8668910332955880 | 0.2160726139973186 | T | T | T |
| 0.8425865097651146 | 0.4626475331020922 | 0.3471591023694826 | T | T | T |
| 0.3120550703201891 | 0.5680751845931137 | 0.1786367446037143 | T | T | T |
| 0.3361084317768565 | 0.2775054875513761 | 0.2676546715304604 | T | T | T |
| 0.5000000000000000 | 0.8670199999999966 | 0.1553899999999970 | F | F | F |
| 0.5000000000000000 | 0.1702000000000012 | 0.0720600000000005 | F | F | F |
| 0.0000000000000000 | 0.6702000000000012 | 0.0720600000000005 | F | F | F |
| 0.0000000000000000 | 0.3670199999999966 | 0.1553899999999970 | F | F | F |
| 0.5791833635951934 | 0.2806775528377903 | 0.3168284934987973 | T | T | T |
| 0.4886217449141328 | 0.5676914022749355 | 0.2377792953022228 | T | T | T |
| 0.0056721768270677 | 0.0736329120684668 | 0.2409196240011266 | T | T | T |
| 0.9545551880139901 | 0.7180641343041693 | 0.3131723568451552 | T | T | T |
| 0.8778095900217296 | 0.4696645882043707 | 0.4034668285952849 | T | T | T |

Co<sub>2</sub>N (110) + \*OH

Co N O H

|                    |                    |                    |
|--------------------|--------------------|--------------------|
| 1.0000000000000000 |                    |                    |
| 4.5225900000000001 | 0.0000000000000000 | 0.0000000000000000 |
| 0.0000000000000000 | 5.1302700000000003 | 0.0000000000000000 |
| 0.0000000000000000 | 0.0000000000000000 | 28.296399999999984 |

Co N O H  
16 8 1 1

Selective dynamics

Direct

|                    |                    |                    |   |   |   |
|--------------------|--------------------|--------------------|---|---|---|
| 0.1762400000000000 | 0.6618899999999996 | 0.0112700000000032 | F | F | F |
|--------------------|--------------------|--------------------|---|---|---|

|                    |                    |                    |   |   |   |
|--------------------|--------------------|--------------------|---|---|---|
| 0.1762400000000000 | 0.3587199999999982 | 0.0946100000000030 | F | F | F |
| 0.8237600000000000 | 0.6785100000000028 | 0.1328499999999977 | F | F | F |
| 0.8237600000000000 | 0.9816799999999972 | 0.0495200000000011 | F | F | F |
| 0.6762400000000000 | 0.4816799999999972 | 0.0495200000000011 | F | F | F |
| 0.6762400000000000 | 0.1785100000000028 | 0.1328499999999977 | F | F | F |
| 0.2690786621477744 | 0.1539705884966786 | 0.0175059985565231 | T | T | T |
| 0.3237600000000000 | 0.8587199999999982 | 0.0946100000000030 | F | F | F |
| 0.1927028056263800 | 0.0713341608502116 | 0.1812107816814758 | T | T | T |
| 0.1731272615008890 | 0.7565129993722631 | 0.2614513591549037 | T | T | T |
| 0.8174749053393500 | 0.0389613386423462 | 0.2983314388231190 | T | T | T |
| 0.8044622795803525 | 0.3641033922906107 | 0.2152483530193064 | T | T | T |
| 0.6872490642524587 | 0.8628624267811856 | 0.2157807087684065 | T | T | T |
| 0.8563774812636976 | 0.4594250787457706 | 0.3463857754662923 | T | T | T |
| 0.3114614138257957 | 0.5683443869475806 | 0.1786787145864654 | T | T | T |
| 0.3400196141017572 | 0.2790967831308947 | 0.2687312024606514 | T | T | T |
| 0.5000000000000000 | 0.8670199999999966 | 0.1553899999999970 | F | F | F |
| 0.5000000000000000 | 0.1702000000000012 | 0.0720600000000005 | F | F | F |
| 0.0000000000000000 | 0.6702000000000012 | 0.0720600000000005 | F | F | F |
| 0.0000000000000000 | 0.3670199999999966 | 0.1553899999999970 | F | F | F |
| 0.5784338191331537 | 0.2850983945062173 | 0.3182260644464443 | T | T | T |
| 0.4871111648236391 | 0.5663870876698061 | 0.2376910726092473 | T | T | T |
| 0.0088947475245986 | 0.0742412882940832 | 0.2407382395471199 | T | T | T |
| 0.9421854544427747 | 0.7179353188462197 | 0.3123680851479533 | T | T | T |
| 0.9830734508533580 | 0.4094762929991440 | 0.4045660494031574 | T | T | T |
| 0.1837292337455971 | 0.3469975138141968 | 0.4102664702112061 | T | T | T |

Co<sub>3</sub>N (110) - Surface

Co N

|                    |                    |                     |
|--------------------|--------------------|---------------------|
| 1.0000000000000000 |                    |                     |
| 4.3237399999999999 | 0.0000000000000000 | 0.0000000000000000  |
| 0.0000000000000000 | 7.8388600000000004 | 0.0000000000000000  |
| 0.0000000000000000 | 0.0000000000000000 | 27.1545999999999985 |

Co N

24 8

Selective dynamics

Direct

|                    |                    |                    |   |   |   |
|--------------------|--------------------|--------------------|---|---|---|
| 0.0000000000000000 | 0.6628499999999988 | 0.0416700000000034 | F | F | F |
| 0.0000000000000000 | 0.1628499999999988 | 0.1250000000000000 | F | F | F |
| 0.0000000000000000 | 0.3371500000000012 | 0.0416700000000034 | F | F | F |
| 0.0000000000000000 | 0.8371500000000012 | 0.1250000000000000 | F | F | F |
| 0.5000000000000000 | 0.8371500000000012 | 0.0126199999999983 | F | F | F |
| 0.5000000000000000 | 0.3371500000000012 | 0.0959500000000020 | F | F | F |

|                    |                     |                    |   |   |   |
|--------------------|---------------------|--------------------|---|---|---|
| 0.0000000000000000 | 0.5000000000000000  | 0.1230899999999977 | F | F | F |
| 0.0000000000000000 | 0.0000000000000000  | 0.0397600000000011 | F | F | F |
| 0.5000000000000000 | 0.1628499999999988  | 0.0126199999999983 | F | F | F |
| 0.5000000000000000 | 0.6628499999999988  | 0.0959500000000020 | F | F | F |
| 0.5000000000000000 | 0.5000000000000000  | 0.0145300000000006 | F | F | F |
| 0.5000000000000000 | 0.0000000000000000  | 0.0978599999999972 | F | F | F |
| 0.9936075328320877 | 0.6619494646645058  | 0.2074857613077082 | T | T | T |
| 0.9828557829534553 | 0.1627822731834923  | 0.2889812355561187 | T | T | T |
| 0.0063924671679123 | 0.3380505353354945  | 0.2074857613077082 | T | T | T |
| 0.0171442170465447 | 0.8372177268165076  | 0.2889812355561187 | T | T | T |
| 0.5006031903773847 | 0.8368758104890105  | 0.1794659363353883 | T | T | T |
| 0.5050754647799763 | 0.3403777501021108  | 0.2654835860954005 | T | T | T |
| 0.0000000000000000 | 0.5000000000000000  | 0.2888398609682909 | T | T | T |
| 0.0000000000000000 | -0.0000000000000000 | 0.2077794853202022 | T | T | T |
| 0.4993968096226157 | 0.1631241895109896  | 0.1794659363353883 | T | T | T |
| 0.4949245352200233 | 0.6596222498978893  | 0.2654835860954005 | T | T | T |
| 0.5000000000000000 | 0.5000000000000000  | 0.1818496849102124 | T | T | T |
| 0.5000000000000000 | -0.0000000000000000 | 0.2626914226711384 | T | T | T |
| 0.7500000000000000 | 0.3333299999999966  | 0.1521400000000028 | F | F | F |
| 0.7500000000000000 | 0.8333299999999966  | 0.0688099999999991 | F | F | F |
| 0.2500000000000000 | 0.6666700000000034  | 0.1521400000000028 | F | F | F |
| 0.2500000000000000 | 0.1666700000000034  | 0.0688099999999991 | F | F | F |
| 0.7763643243541954 | 0.3337559255335522  | 0.3136467737155938 | T | T | T |
| 0.7437342300979194 | 0.8278101621713015  | 0.2377152662223739 | T | T | T |
| 0.2236356756458045 | 0.6662440744664478  | 0.3136467737155938 | T | T | T |
| 0.2562657699020808 | 0.1721898378286983  | 0.2377152662223739 | T | T | T |

Co<sub>3</sub>N (110) + \*OOH

Co N O H

|                    |                    |                     |
|--------------------|--------------------|---------------------|
| 1.0000000000000000 |                    |                     |
| 4.3237399999999999 | 0.0000000000000000 | 0.0000000000000000  |
| 0.0000000000000000 | 7.8388600000000004 | 0.0000000000000000  |
| 0.0000000000000000 | 0.0000000000000000 | 27.1545999999999985 |

Co N O H

24 8 2 1

Selective dynamics

Direct

|                    |                    |                    |   |   |   |
|--------------------|--------------------|--------------------|---|---|---|
| 0.0000000000000000 | 0.6628499999999988 | 0.0416700000000034 | F | F | F |
| 0.0000000000000000 | 0.1628499999999988 | 0.1250000000000000 | F | F | F |
| 0.0000000000000000 | 0.3371500000000012 | 0.0416700000000034 | F | F | F |
| 0.0000000000000000 | 0.8371500000000012 | 0.1250000000000000 | F | F | F |
| 0.5000000000000000 | 0.8371500000000012 | 0.0126199999999983 | F | F | F |

|                     |                     |                    |   |   |   |
|---------------------|---------------------|--------------------|---|---|---|
| 0.5000000000000000  | 0.337150000000012   | 0.095950000000020  | F | F | F |
| 0.0000000000000000  | 0.5000000000000000  | 0.123089999999977  | F | F | F |
| 0.0000000000000000  | 0.0000000000000000  | 0.039760000000011  | F | F | F |
| 0.5000000000000000  | 0.162849999999988   | 0.012619999999983  | F | F | F |
| 0.5000000000000000  | 0.662849999999988   | 0.095950000000020  | F | F | F |
| 0.5000000000000000  | 0.5000000000000000  | 0.014530000000006  | F | F | F |
| 0.5000000000000000  | 0.0000000000000000  | 0.097859999999972  | F | F | F |
| 0.0041064525326446  | 0.6618806893089991  | 0.2084247665899627 | T | T | T |
| 0.9713411792638783  | 0.1655265610215740  | 0.2877516718342570 | T | T | T |
| -0.0001003393034808 | 0.3383106098964976  | 0.2079020055559008 | T | T | T |
| 0.0191398303967603  | 0.8420147256452080  | 0.2888805093840336 | T | T | T |
| 0.5005005854685100  | 0.8362421579040961  | 0.1799432229541702 | T | T | T |
| 0.4920658711101087  | 0.3470994821348793  | 0.2666084611862661 | T | T | T |
| 0.0696060154237560  | 0.4900062164383002  | 0.3206936427490947 | T | T | T |
| 0.0003613176117724  | -0.0003705647861821 | 0.2071242162813640 | T | T | T |
| 0.5005835223408478  | 0.1635515675653163  | 0.1801696520524667 | T | T | T |
| 0.4971087945522252  | 0.6598562808104538  | 0.2677078320121470 | T | T | T |
| 0.4999406621927327  | 0.4999408643701120  | 0.1817529953693292 | T | T | T |
| 0.4994433084930576  | 0.9988142198336027  | 0.2609833449877084 | T | T | T |
| 0.7500000000000000  | 0.333329999999966   | 0.152140000000028  | F | F | F |
| 0.7500000000000000  | 0.833329999999966   | 0.068809999999991  | F | F | F |
| 0.2500000000000000  | 0.666670000000034   | 0.152140000000028  | F | F | F |
| 0.2500000000000000  | 0.166670000000034   | 0.068809999999991  | F | F | F |
| 0.7676315130464895  | 0.3337573196528060  | 0.3122950664032790 | T | T | T |
| 0.7461183950554203  | 0.8211900460132038  | 0.2381123160354423 | T | T | T |
| 0.2509863903869509  | 0.6943527429419252  | 0.3172013761892656 | T | T | T |
| 0.2536156790018090  | 0.1756699788726422  | 0.2379452443466225 | T | T | T |
| 0.1115885011397237  | 0.4378929694765651  | 0.3855563656640782 | T | T | T |
| 0.3310017599977055  | 0.5341904256189994  | 0.4135570609052193 | T | T | T |
| 0.5243578724292779  | 0.4696487868673533  | 0.4086348769257362 | T | T | T |

Co<sub>3</sub>N (110) + \*O

Co N O

|                    |                    |                    |
|--------------------|--------------------|--------------------|
| 1.0000000000000000 |                    |                    |
| 4.323739999999999  | 0.0000000000000000 | 0.0000000000000000 |
| 0.0000000000000000 | 7.8388600000000004 | 0.0000000000000000 |
| 0.0000000000000000 | 0.0000000000000000 | 27.154599999999985 |

Co N O

24 8 1

Selective dynamics

Direct

|                    |                   |                   |   |   |   |
|--------------------|-------------------|-------------------|---|---|---|
| 0.0000000000000000 | 0.662849999999988 | 0.041670000000034 | F | F | F |
|--------------------|-------------------|-------------------|---|---|---|

|                     |                    |                    |   |   |   |
|---------------------|--------------------|--------------------|---|---|---|
| 0.0000000000000000  | 0.1628499999999988 | 0.1250000000000000 | F | F | F |
| 0.0000000000000000  | 0.3371500000000012 | 0.0416700000000034 | F | F | F |
| 0.0000000000000000  | 0.8371500000000012 | 0.1250000000000000 | F | F | F |
| 0.5000000000000000  | 0.8371500000000012 | 0.0126199999999983 | F | F | F |
| 0.5000000000000000  | 0.3371500000000012 | 0.0959500000000020 | F | F | F |
| 0.0000000000000000  | 0.5000000000000000 | 0.1230899999999977 | F | F | F |
| 0.0000000000000000  | 0.0000000000000000 | 0.0397600000000011 | F | F | F |
| 0.5000000000000000  | 0.1628499999999988 | 0.0126199999999983 | F | F | F |
| 0.5000000000000000  | 0.6628499999999988 | 0.0959500000000020 | F | F | F |
| 0.5000000000000000  | 0.5000000000000000 | 0.0145300000000006 | F | F | F |
| 0.5000000000000000  | 0.0000000000000000 | 0.0978599999999972 | F | F | F |
| -0.0049281764886683 | 0.6633614784427622 | 0.2073611125681853 | T | T | T |
| 0.9783098478369922  | 0.1670216892808400 | 0.2880449177120347 | T | T | T |
| 0.0036360529010814  | 0.3370640089150721 | 0.2075099647857422 | T | T | T |
| 0.0179725636015947  | 0.8402531905448365 | 0.2898379867325946 | T | T | T |
| 0.4994639038349971  | 0.8370440072997237 | 0.1802041123387148 | T | T | T |
| 0.5046385853972147  | 0.3494423869446392 | 0.2666155926628017 | T | T | T |
| 0.1102589559846695  | 0.4751011148174115 | 0.3301146950656307 | T | T | T |
| 0.0017977204229517  | 0.9998223661479484 | 0.2078259772189765 | T | T | T |
| 0.5022308409485114  | 0.1630079052545742 | 0.1802575930439833 | T | T | T |
| 0.4744930337503517  | 0.6608886054050495 | 0.2646575000355704 | T | T | T |
| 0.4977998000164066  | 0.4990873714379206 | 0.1815746916880811 | T | T | T |
| 0.5029993287853991  | 0.0006654789551114 | 0.2610848345985590 | T | T | T |
| 0.7500000000000000  | 0.3333299999999966 | 0.1521400000000028 | F | F | F |
| 0.7500000000000000  | 0.8333299999999966 | 0.0688099999999991 | F | F | F |
| 0.2500000000000000  | 0.6666700000000034 | 0.1521400000000028 | F | F | F |
| 0.2500000000000000  | 0.1666700000000034 | 0.0688099999999991 | F | F | F |
| 0.7940130481810878  | 0.3473250501793680 | 0.3103262103154499 | T | T | T |
| 0.7452630908111305  | 0.8203849615459704 | 0.2391077073832215 | T | T | T |
| 0.2450928418505798  | 0.6847303530193297 | 0.3168880242438643 | T | T | T |
| 0.2600754759361155  | 0.1791955369961440 | 0.2386137106358317 | T | T | T |
| 0.2250981892152037  | 0.4165724911586171 | 0.3843559114675782 | T | T | T |

Co<sub>3</sub>N (110) + \*OH

Co N O H

|                    |                    |                     |
|--------------------|--------------------|---------------------|
| 1.0000000000000000 |                    |                     |
| 4.3237399999999999 | 0.0000000000000000 | 0.0000000000000000  |
| 0.0000000000000000 | 7.8388600000000004 | 0.0000000000000000  |
| 0.0000000000000000 | 0.0000000000000000 | 27.1545999999999985 |

Co N O H

24 8 1 1

Selective dynamics



Direct

|                    |                     |                    |   |   |   |
|--------------------|---------------------|--------------------|---|---|---|
| 0.0000000000000000 | 0.6628499999999988  | 0.0416700000000034 | F | F | F |
| 0.0000000000000000 | 0.1628499999999988  | 0.1250000000000000 | F | F | F |
| 0.0000000000000000 | 0.3371500000000012  | 0.0416700000000034 | F | F | F |
| 0.0000000000000000 | 0.8371500000000012  | 0.1250000000000000 | F | F | F |
| 0.5000000000000000 | 0.8371500000000012  | 0.0126199999999983 | F | F | F |
| 0.5000000000000000 | 0.3371500000000012  | 0.0959500000000020 | F | F | F |
| 0.0000000000000000 | 0.5000000000000000  | 0.1230899999999977 | F | F | F |
| 0.0000000000000000 | 0.0000000000000000  | 0.0397600000000011 | F | F | F |
| 0.5000000000000000 | 0.1628499999999988  | 0.0126199999999983 | F | F | F |
| 0.5000000000000000 | 0.6628499999999988  | 0.0959500000000020 | F | F | F |
| 0.5000000000000000 | 0.5000000000000000  | 0.0145300000000006 | F | F | F |
| 0.5000000000000000 | 0.0000000000000000  | 0.0978599999999972 | F | F | F |
| 0.0060296340381266 | 0.6616548952128396  | 0.2085777087044553 | T | T | T |
| 0.9747538746926234 | 0.1650185167971606  | 0.2877406951987044 | T | T | T |
| 0.0017494693535141 | 0.3381766465898211  | 0.2077770166391426 | T | T | T |
| 0.0225494722009788 | 0.8417462665354901  | 0.2890085268462448 | T | T | T |
| 0.5019590794922805 | 0.8360982205424929  | 0.1800182978686634 | T | T | T |
| 0.4965141307104508 | 0.3482482052055826  | 0.2659386067088917 | T | T | T |
| 0.0683296021612380 | 0.4920085673464699  | 0.3206778723923240 | T | T | T |
| 0.0028862823671580 | -0.0001830421516005 | 0.2071088671432206 | T | T | T |
| 0.5020687070901938 | 0.1632115832986949  | 0.1801399255121933 | T | T | T |
| 0.5000501276019449 | 0.6605733301662217  | 0.2675919015537727 | T | T | T |
| 0.5013919809900910 | 0.5004110846803718  | 0.1815583789039427 | T | T | T |
| 0.5025121786446957 | 0.9993150141911271  | 0.2609944293090752 | T | T | T |
| 0.7500000000000000 | 0.3333299999999966  | 0.1521400000000028 | F | F | F |
| 0.7500000000000000 | 0.8333299999999966  | 0.0688099999999991 | F | F | F |
| 0.2500000000000000 | 0.6666700000000034  | 0.1521400000000028 | F | F | F |
| 0.2500000000000000 | 0.1666700000000034  | 0.0688099999999991 | F | F | F |
| 0.7715787912184254 | 0.3348984635912193  | 0.3113998089363015 | T | T | T |
| 0.7493104671932463 | 0.8217243234611961  | 0.2381884053910515 | T | T | T |
| 0.2572912972645012 | 0.6950012374286532  | 0.3175125542203761 | T | T | T |
| 0.2567968550156581 | 0.1764028612146708  | 0.2380878745861623 | T | T | T |
| 0.1447765496727720 | 0.4428346224003512  | 0.3842768822693506 | T | T | T |
| 0.3067261963863205 | 0.5183035926910595  | 0.3968674202820815 | T | T | T |

CoN (100) - Surface

Co N

|                    |                    |                     |
|--------------------|--------------------|---------------------|
| 1.0000000000000000 |                    |                     |
| 5.9912599999999996 | 0.0000000000000000 | 0.0000000000000000  |
| 2.9956300000000002 | 5.1885833606775549 | 0.0000000000000000  |
| 0.0000000000000000 | 0.0000000000000000 | 29.3510999999999989 |

Co N

16 16

Selective dynamics

Direct

|                    |                    |                    |   |   |   |
|--------------------|--------------------|--------------------|---|---|---|
| 0.0625000000000000 | 0.3750000000000000 | 0.0312500000000000 | F | F | F |
| 0.2291700000000034 | 0.0416600000000003 | 0.1145799999999966 | F | F | F |
| 0.3958329488885254 | 0.2083324705890763 | 0.1978594754853196 | T | T | T |
| 0.0625012131539842 | 0.3749986758322464 | 0.2835984559653617 | T | T | T |
| 0.0625000000000000 | 0.8750000000000000 | 0.0312500000000000 | F | F | F |
| 0.2291700000000034 | 0.5416600000000003 | 0.1145799999999966 | F | F | F |
| 0.3958317514457508 | 0.7083369012203634 | 0.1978599888729220 | T | T | T |
| 0.0624996284094849 | 0.8750015698170077 | 0.2835988906923768 | T | T | T |
| 0.5625000000000000 | 0.3750000000000000 | 0.0312500000000000 | F | F | F |
| 0.7291700000000034 | 0.0416600000000003 | 0.1145799999999966 | F | F | F |
| 0.8958329488885255 | 0.2083324705890763 | 0.1978594754853196 | T | T | T |
| 0.5625012131539843 | 0.3749986758322464 | 0.2835984559653617 | T | T | T |
| 0.5625000000000000 | 0.8750000000000000 | 0.0312500000000000 | F | F | F |
| 0.7291700000000034 | 0.5416600000000003 | 0.1145799999999966 | F | F | F |
| 0.8958317514457508 | 0.7083369012203634 | 0.1978599888729220 | T | T | T |
| 0.5624996284094850 | 0.8750015698170077 | 0.2835988906923768 | T | T | T |
| 0.2291700000000034 | 0.0416600000000003 | 0.0520799999999966 | F | F | F |
| 0.3958299999999966 | 0.2083299999999966 | 0.1354200000000034 | F | F | F |
| 0.0624965575386414 | 0.3750055620693777 | 0.2206018743607968 | T | T | T |
| 0.2291632806983572 | 0.0416733793417275 | 0.3015466230879810 | T | T | T |
| 0.2291700000000034 | 0.5416600000000003 | 0.0520799999999966 | F | F | F |
| 0.3958299999999966 | 0.7083399999999997 | 0.1354200000000034 | F | F | F |
| 0.0625015180656473 | 0.8749969356330251 | 0.2206025450767849 | T | T | T |
| 0.2291706388403280 | 0.5416589108357960 | 0.3015482586333095 | T | T | T |
| 0.7291700000000034 | 0.0416600000000003 | 0.0520799999999966 | F | F | F |
| 0.8958299999999966 | 0.2083299999999966 | 0.1354200000000034 | F | F | F |
| 0.5624965575386413 | 0.3750055620693777 | 0.2206018743607968 | T | T | T |
| 0.7291632806983500 | 0.0416733793417275 | 0.3015466230879810 | T | T | T |
| 0.7291700000000034 | 0.5416600000000003 | 0.0520799999999966 | F | F | F |
| 0.8958300000000037 | 0.7083399999999997 | 0.1354200000000034 | F | F | F |
| 0.5625015180656473 | 0.8749969356330251 | 0.2206025450767849 | T | T | T |
| 0.7291706388403210 | 0.5416589108357960 | 0.3015482586333095 | T | T | T |

CoN (100) + \*OOH

Co N O H

1.0000000000000000

5.9912599999999996 0.0000000000000000 0.0000000000000000

2.9956300000000002 5.1885833606775549 0.0000000000000000

0.0000000000000000 0.0000000000000000 29.3510999999999989

Co N O H

16 16 2 1

Selective dynamics

Direct

|                     |                     |                     |       |
|---------------------|---------------------|---------------------|-------|
| 0.0625000000000000  | 0.3750000000000000  | 0.0312500000000000  | F F F |
| 0.22917000000000034 | 0.04166000000000003 | 0.11457999999999966 | F F F |
| 0.3922020481237577  | 0.2068506124773554  | 0.1969969150815920  | T T T |
| 0.0526734121270851  | 0.3854124418052444  | 0.2833642790053743  | T T T |
| 0.0625000000000000  | 0.8750000000000000  | 0.0312500000000000  | F F F |
| 0.22917000000000034 | 0.54166000000000003 | 0.11457999999999966 | F F F |
| 0.4010611496240545  | 0.7050858031815647  | 0.1989301299882417  | T T T |
| 0.0646526988180354  | 0.8793798765007438  | 0.280966685226217   | T T T |
| 0.5625000000000000  | 0.3750000000000000  | 0.0312500000000000  | F F F |
| 0.72917000000000034 | 0.04166000000000003 | 0.11457999999999966 | F F F |
| 0.8909030299706123  | 0.2152511245447182  | 0.1989382851241947  | T T T |
| 0.5706690529326330  | 0.3853397565274926  | 0.2819762877197093  | T T T |
| 0.5625000000000000  | 0.8750000000000000  | 0.0312500000000000  | F F F |
| 0.72917000000000034 | 0.54166000000000003 | 0.11457999999999966 | F F F |
| 0.8924747302601548  | 0.7066548092338786  | 0.1985231819596416  | T T T |
| 0.5704660771547264  | 0.8676604091659643  | 0.2832492786577085  | T T T |
| 0.22917000000000034 | 0.04166000000000003 | 0.05207999999999966 | F F F |
| 0.39582999999999966 | 0.20832999999999966 | 0.13542000000000034 | F F F |
| 0.0638685479962192  | 0.3745255112679730  | 0.2206815381941369  | T T T |
| 0.2378975750105647  | 0.0527678198756720  | 0.2974652044778839  | T T T |
| 0.22917000000000034 | 0.54166000000000003 | 0.05207999999999966 | F F F |
| 0.39582999999999966 | 0.70833999999999997 | 0.13542000000000034 | F F F |
| 0.0620159319430702  | 0.8763715466083023  | 0.2185559625258862  | T T T |
| 0.2349114216670903  | 0.5364972881269239  | 0.2975749829564310  | T T T |
| 0.72917000000000034 | 0.04166000000000003 | 0.05207999999999966 | F F F |
| 0.89582999999999966 | 0.20832999999999966 | 0.13542000000000034 | F F F |
| 0.5570498571530558  | 0.3714652999316601  | 0.2203033052444281  | T T T |
| 0.7216898734146914  | 0.0496471895901225  | 0.2975619905954255  | T T T |
| 0.72917000000000034 | 0.54166000000000003 | 0.05207999999999966 | F F F |
| 0.89583000000000037 | 0.70833999999999997 | 0.13542000000000034 | F F F |
| 0.5599945072014026  | 0.8785127638197584  | 0.2206096662505992  | T T T |
| 0.7327520883753939  | 0.5477516362330889  | 0.3180467335483049  | T T T |
| 0.7175291805257119  | 0.5351890055054059  | 0.3599417918454416  | T T T |
| 0.8659205263272517  | 0.6927111070794335  | 0.3908841986412995  | T T T |
| 0.8044160698886470  | 0.6686246522480261  | 0.4204369018366380  | T T T |

CoN (100) + \*O

Co N O

1.0000000000000000

5.991259999999996 0.000000000000000 0.000000000000000  
2.9956300000000002 5.188583360677549 0.000000000000000  
0.0000000000000000 0.000000000000000 29.351099999999989

Co N O

16 16 1

Selective dynamics

Direct

|                    |                    |                    |   |   |   |
|--------------------|--------------------|--------------------|---|---|---|
| 0.0625000000000000 | 0.3750000000000000 | 0.0312500000000000 | F | F | F |
| 0.2291700000000034 | 0.0416600000000003 | 0.1145799999999966 | F | F | F |
| 0.3980728234810614 | 0.2096281594345961 | 0.1975578173990670 | T | T | T |
| 0.0637371338312782 | 0.3779275663946539 | 0.2827461086690782 | T | T | T |
| 0.0625000000000000 | 0.8750000000000000 | 0.0312500000000000 | F | F | F |
| 0.2291700000000034 | 0.5416600000000003 | 0.1145799999999966 | F | F | F |
| 0.4023341830765143 | 0.7073818339632491 | 0.1985972476033698 | T | T | T |
| 0.0659724981265316 | 0.8769196232745970 | 0.2817674365790499 | T | T | T |
| 0.5625000000000000 | 0.3750000000000000 | 0.0312500000000000 | F | F | F |
| 0.7291700000000034 | 0.0416600000000003 | 0.1145799999999966 | F | F | F |
| 0.8958666355246828 | 0.2138723985813598 | 0.1985990144134462 | T | T | T |
| 0.5672160247809057 | 0.3780636361008166 | 0.2827580744130507 | T | T | T |
| 0.5625000000000000 | 0.8750000000000000 | 0.0312500000000000 | F | F | F |
| 0.7291700000000034 | 0.5416600000000003 | 0.1145799999999966 | F | F | F |
| 0.8959461953412007 | 0.7073749977027735 | 0.1985901401787441 | T | T | T |
| 0.5669981193879033 | 0.8746754522816194 | 0.2827475070289751 | T | T | T |
| 0.2291700000000034 | 0.0416600000000003 | 0.0520799999999966 | F | F | F |
| 0.3958299999999966 | 0.2083299999999966 | 0.1354200000000034 | F | F | F |
| 0.0667322472362013 | 0.3753487500932968 | 0.2202357001755790 | T | T | T |
| 0.2353641574111821 | 0.0463333980344138 | 0.2998220917003594 | T | T | T |
| 0.2291700000000034 | 0.5416600000000003 | 0.0520799999999966 | F | F | F |
| 0.3958299999999966 | 0.7083399999999997 | 0.1354200000000034 | F | F | F |
| 0.0649080189567582 | 0.8763467574222941 | 0.2190807834756231 | T | T | T |
| 0.2354419519728984 | 0.5379733100574170 | 0.2997335088974835 | T | T | T |
| 0.7291700000000034 | 0.0416600000000003 | 0.0520799999999966 | F | F | F |
| 0.8958299999999966 | 0.2083299999999966 | 0.1354200000000034 | F | F | F |
| 0.5639551424670671 | 0.3753645864931030 | 0.2202729425238914 | T | T | T |
| 0.7269859691082422 | 0.0463946773597235 | 0.2997704513162534 | T | T | T |
| 0.7291700000000034 | 0.5416600000000003 | 0.0520799999999966 | F | F | F |
| 0.8958300000000037 | 0.7083399999999997 | 0.1354200000000034 | F | F | F |
| 0.5639338442714683 | 0.8781923169456860 | 0.2202419969589720 | T | T | T |
| 0.7329701667414493 | 0.5438288723371369 | 0.3139958482755006 | T | T | T |
| 0.7332292151962155 | 0.5441063411818248 | 0.3557987948639795 | T | T | T |

CoN (100) + \*OH

Co N O H

1.0000000000000000

5.9912599999999996 0.0000000000000000 0.0000000000000000

2.9956300000000002 5.1885833606775549 0.0000000000000000

0.0000000000000000 0.0000000000000000 29.3510999999999989

Co N O H

16 16 1 1

Selective dynamics

Direct

0.0625000000000000 0.3750000000000000 0.0312500000000000 F F F

0.2291700000000034 0.0416600000000003 0.1145799999999966 F F F

0.3979436939672130 0.2084989700975169 0.1993267721583549 T T T

0.0916836035274513 0.3599111422015733 0.2818598276194994 T T T

0.0625000000000000 0.8750000000000000 0.0312500000000000 F F F

0.2291700000000034 0.5416600000000003 0.1145799999999966 F F F

0.4010539648463100 0.7050305046614180 0.1978597803252826 T T T

0.0639918373974718 0.8738220489235085 0.2831736832558495 T T T

0.5625000000000000 0.3750000000000000 0.0312500000000000 F F F

0.7291700000000034 0.0416600000000003 0.1145799999999966 F F F

0.8933830540750569 0.2124166711411653 0.1978370319824089 T T T

0.5501398529066308 0.3612206800022209 0.2829433906680472 T T T

0.5625000000000000 0.8750000000000000 0.0312500000000000 F F F

0.7291700000000034 0.5416600000000003 0.1145799999999966 F F F

0.8951158737078870 0.7069480141733829 0.1977486266729846 T T T

0.5502599863056625 0.9010715837659679 0.2820567903250462 T T T

0.2291700000000034 0.0416600000000003 0.0520799999999966 F F F

0.3958299999999966 0.2083299999999966 0.1354200000000034 F F F

0.0620112570012302 0.3754691243302474 0.2198635316110557 T T T

0.2283166216304280 0.0385073187728355 0.3028079256302633 T T T

0.2291700000000034 0.5416600000000003 0.0520799999999966 F F F

0.3958299999999966 0.7083399999999997 0.1354200000000034 F F F

0.0640649611525719 0.8752586866019915 0.2193004398782747 T T T

0.2271587123851823 0.5449239851388706 0.3037202488160471 T T T

0.7291700000000034 0.0416600000000003 0.0520799999999966 F F F

0.8958299999999966 0.2083299999999966 0.1354200000000034 F F F

0.5643305934128334 0.3758731427827077 0.2207309951614599 T T T

0.7347397259644395 0.0380801356774946 0.3034390180545057 T T T

0.7291700000000034 0.5416600000000003 0.0520799999999966 F F F

0.8958300000000037 0.7083399999999997 0.1354200000000034 F F F

0.5644062258332441 0.8728358887719168 0.2200654477817889 T T T

0.7324678688072912 0.5410457149932977 0.3022387999615345 T T T

0.7314326797583974 0.5394933742948230 0.3504810261615095 T T T

0.8342137140984837 0.6189886619043793 0.3596697896099253 T T T

ReN<sub>2</sub> (110) - Surface

Re N

1.0000000000000000  
9.5357500000000002 0.0000000000000000 0.0000000000000000  
0.0000000000000000 5.0288700000000004 0.0000000000000000  
0.0000000000000000 0.0000000000000000 28.1466999999999992

Re N

16 32

Selective dynamics

Direct

|                    |                    |                    |   |   |   |
|--------------------|--------------------|--------------------|---|---|---|
| 0.3913599999999988 | 0.9949999999999974 | 0.1482699999999966 | F | F | F |
| 0.3913599999999988 | 0.3148499999999999 | 0.0649400000000000 | F | F | F |
| 0.8913599999999988 | 0.8402099999999990 | 0.0067900000000023 | F | F | F |
| 0.8913599999999988 | 0.5203599999999966 | 0.0901199999999989 | F | F | F |
| 0.6086400000000012 | 0.3402099999999990 | 0.0067900000000023 | F | F | F |
| 0.6086400000000012 | 0.0203599999999966 | 0.0901199999999989 | F | F | F |
| 0.1086400000000012 | 0.4949999999999974 | 0.1482699999999966 | F | F | F |
| 0.1086400000000012 | 0.8148499999999999 | 0.0649400000000000 | F | F | F |
| 0.3779247282523819 | 0.3429204041731813 | 0.3124337782787390 | T | T | T |
| 0.3987270371120062 | 0.6341397744196324 | 0.2348338686166088 | T | T | T |
| 0.8913211015547602 | 0.2021041058317532 | 0.1709482628095874 | T | T | T |
| 0.8873249037943943 | 0.8256375150099177 | 0.2635999808885629 | T | T | T |
| 0.6097387756446675 | 0.7020693503432337 | 0.1704804094026810 | T | T | T |
| 0.6105189047697778 | 0.3284131856404612 | 0.2638843291537446 | T | T | T |
| 0.1129151383355576 | 0.8397722193997392 | 0.3143490947790991 | T | T | T |
| 0.1023846099238402 | 0.1310807656134352 | 0.2357581516331657 | T | T | T |
| 0.3263999999999996 | 0.7173700000000025 | 0.0529999999999973 | F | F | F |
| 0.3263999999999996 | 0.3975200000000001 | 0.1363300000000010 | F | F | F |
| 0.8263999999999996 | 0.4376900000000035 | 0.0187299999999979 | F | F | F |
| 0.8263999999999996 | 0.1178400000000011 | 0.1020600000000016 | F | F | F |
| 0.6736000000000004 | 0.6178400000000011 | 0.1020600000000016 | F | F | F |
| 0.6736000000000004 | 0.9376900000000035 | 0.0187299999999979 | F | F | F |
| 0.1736000000000004 | 0.8975200000000001 | 0.1363300000000010 | F | F | F |
| 0.1736000000000004 | 0.2173700000000025 | 0.0529999999999973 | F | F | F |
| 0.4049499999999995 | 0.5897300000000030 | 0.1598800000000011 | F | F | F |
| 0.4049499999999995 | 0.9095799999999983 | 0.0765499999999975 | F | F | F |
| 0.9049499999999995 | 0.6057800000000029 | 0.1618500000000012 | F | F | F |
| 0.9049499999999995 | 0.9256299999999982 | 0.0785100000000014 | F | F | F |
| 0.5950500000000005 | 0.1057800000000029 | 0.1618500000000012 | F | F | F |
| 0.5950500000000005 | 0.4256299999999982 | 0.0785100000000014 | F | F | F |
| 0.0982411504415803 | 0.0884553253913684 | 0.1616577458285578 | T | T | T |

|                    |                    |                    |   |   |   |
|--------------------|--------------------|--------------------|---|---|---|
| 0.0950500000000005 | 0.4095799999999983 | 0.0765499999999975 | F | F | F |
| 0.3279060603023116 | 0.0360595802054665 | 0.2211213548387357 | T | T | T |
| 0.3682253609601452 | 0.7475351952743167 | 0.3048297171580606 | T | T | T |
| 0.8284756638969930 | 0.7999563230831016 | 0.1859808134668909 | T | T | T |
| 0.8244276515364475 | 0.4418259671219348 | 0.2662893423838604 | T | T | T |
| 0.6771076629694404 | 0.9372403319655725 | 0.2663222629246319 | T | T | T |
| 0.6726484418514548 | 0.2993780734733161 | 0.1854912127561104 | T | T | T |
| 0.1500253275113676 | 0.2394595419276359 | 0.3046080066178877 | T | T | T |
| 0.1725485872832490 | 0.5346136750084797 | 0.2214075223292795 | T | T | T |
| 0.3456355214513410 | 0.9347577399017543 | 0.3340942582821333 | T | T | T |
| 0.4051391714807107 | 0.2275470000749607 | 0.2452425982214927 | T | T | T |
| 0.9295936022553503 | 0.8727801197512556 | 0.3324488985396078 | T | T | T |
| 0.8983315787223843 | 0.2404675752901849 | 0.2462362536690938 | T | T | T |
| 0.5706106698457759 | 0.3580091222517604 | 0.3305737762421984 | T | T | T |
| 0.6038285117700992 | 0.7384539630612376 | 0.2456049301433849 | T | T | T |
| 0.1663032540459924 | 0.4457555551080692 | 0.3329325582536439 | T | T | T |
| 0.0949019428241314 | 0.7239448297688005 | 0.2461591583788810 | T | T | T |

ReN<sub>2</sub> (110) + \*OOH

Re N O H

|                    |                    |                    |
|--------------------|--------------------|--------------------|
| 1.0000000000000000 |                    |                    |
| 9.5357500000000002 | 0.0000000000000000 | 0.0000000000000000 |
| 0.0000000000000000 | 5.0288700000000004 | 0.0000000000000000 |
| 0.0000000000000000 | 0.0000000000000000 | 28.146699999999992 |

Re N O H

16 32 2 1

Selective dynamics

Direct

|                    |                    |                    |   |   |   |
|--------------------|--------------------|--------------------|---|---|---|
| 0.3913599999999988 | 0.9949999999999974 | 0.1482699999999966 | F | F | F |
| 0.3913599999999988 | 0.3148499999999999 | 0.0649400000000000 | F | F | F |
| 0.8913599999999988 | 0.8402099999999990 | 0.0067900000000023 | F | F | F |
| 0.8913599999999988 | 0.5203599999999966 | 0.0901199999999989 | F | F | F |
| 0.6086400000000012 | 0.3402099999999990 | 0.0067900000000023 | F | F | F |
| 0.6086400000000012 | 0.0203599999999966 | 0.0901199999999989 | F | F | F |
| 0.1086400000000012 | 0.4949999999999974 | 0.1482699999999966 | F | F | F |
| 0.1086400000000012 | 0.8148499999999999 | 0.0649400000000000 | F | F | F |
| 0.3903285604949228 | 0.3109478014692605 | 0.3122048190298199 | T | T | T |
| 0.3948145359231364 | 0.6316844966220472 | 0.2349891354582536 | T | T | T |
| 0.8908430034772539 | 0.2024320227984007 | 0.1711393629642062 | T | T | T |
| 0.8913438131199738 | 0.8407886792350117 | 0.2634286106655707 | T | T | T |
| 0.6087807865005409 | 0.7024034000082107 | 0.1707148765004848 | T | T | T |
| 0.6109430651867898 | 0.3351812872447925 | 0.2634986778156554 | T | T | T |

|                    |                    |                    |   |   |   |
|--------------------|--------------------|--------------------|---|---|---|
| 0.1111235855415995 | 0.8612895563019891 | 0.3171574734619435 | T | T | T |
| 0.1026469536491857 | 0.1434549282589114 | 0.2350193952248412 | T | T | T |
| 0.3263999999999996 | 0.7173700000000025 | 0.0529999999999973 | F | F | F |
| 0.3263999999999996 | 0.3975200000000001 | 0.1363300000000010 | F | F | F |
| 0.8263999999999996 | 0.4376900000000035 | 0.0187299999999979 | F | F | F |
| 0.8263999999999996 | 0.1178400000000011 | 0.1020600000000016 | F | F | F |
| 0.6736000000000004 | 0.6178400000000011 | 0.1020600000000016 | F | F | F |
| 0.6736000000000004 | 0.9376900000000035 | 0.0187299999999979 | F | F | F |
| 0.1704039845040551 | 0.8954045278385815 | 0.1377176486446166 | T | T | T |
| 0.1736000000000004 | 0.2173700000000025 | 0.0529999999999973 | F | F | F |
| 0.4049499999999995 | 0.5897300000000030 | 0.1598800000000011 | F | F | F |
| 0.4049499999999995 | 0.9095799999999983 | 0.0765499999999975 | F | F | F |
| 0.9049499999999995 | 0.6057800000000029 | 0.1618500000000012 | F | F | F |
| 0.9049499999999995 | 0.9256299999999982 | 0.0785100000000014 | F | F | F |
| 0.5950500000000005 | 0.1057800000000029 | 0.1618500000000012 | F | F | F |
| 0.5950500000000005 | 0.4256299999999982 | 0.0785100000000014 | F | F | F |
| 0.0950500000000005 | 0.0897300000000030 | 0.1598800000000011 | F | F | F |
| 0.0950500000000005 | 0.4095799999999983 | 0.0765499999999975 | F | F | F |
| 0.3273357520795273 | 0.0352950493129279 | 0.2202648841965419 | T | T | T |
| 0.3333256402641221 | 0.7193206073425040 | 0.3077682886290009 | T | T | T |
| 0.8269441801146434 | 0.8001066451164348 | 0.1849038816779430 | T | T | T |
| 0.8253096861394634 | 0.4530162819512702 | 0.2660827095980162 | T | T | T |
| 0.6748243580453228 | 0.9490464108317945 | 0.2654332693366884 | T | T | T |
| 0.6722846969625675 | 0.3007627313323754 | 0.1850824024542718 | T | T | T |
| 0.1466534956833016 | 0.2571150919432635 | 0.3075823336575997 | T | T | T |
| 0.1707426214486936 | 0.5462948708049118 | 0.2213893868687128 | T | T | T |
| 0.3676450331976943 | 0.9440889640679768 | 0.3275245826949759 | T | T | T |
| 0.4063158781590854 | 0.2242987197215069 | 0.2441525885068418 | T | T | T |
| 0.9151386141518962 | 0.8879701934109208 | 0.3302456312645307 | T | T | T |
| 0.8988798999763673 | 0.2537399428151647 | 0.2459734591032181 | T | T | T |
| 0.5772945598833720 | 0.3841335008466599 | 0.3306240924485728 | T | T | T |
| 0.5988826885567563 | 0.7500586931221269 | 0.2461667578321682 | T | T | T |
| 0.0783769484231125 | 0.4453893044476875 | 0.3343805797249272 | T | T | T |
| 0.0949290941122478 | 0.7371516028254701 | 0.2463965836585489 | T | T | T |
| 0.0066132203596357 | 0.3735187050553186 | 0.3680404009535181 | T | T | T |
| 0.1491686639612201 | 0.8746528341585040 | 0.3856526568818970 | T | T | T |
| 0.0624927876856809 | 0.8674287321198229 | 0.4040792174989957 | T | T | T |

ReN<sub>2</sub> (110) + \*O

Re N O

1.0000000000000000

9.5357500000000002 0.0000000000000000 0.0000000000000000



0.0000000000000000 5.0288700000000004 0.0000000000000000  
0.0000000000000000 0.0000000000000000 28.1466999999999992

Re N O  
16 32 1

Selective dynamics

Direct

|                     |                     |                     |   |   |   |
|---------------------|---------------------|---------------------|---|---|---|
| 0.39135999999999988 | 0.99499999999999974 | 0.14826999999999966 | F | F | F |
| 0.39135999999999988 | 0.31484999999999999 | 0.06494000000000000 | F | F | F |
| 0.89135999999999988 | 0.84020999999999990 | 0.00679000000000023 | F | F | F |
| 0.89135999999999988 | 0.52035999999999966 | 0.09011999999999989 | F | F | F |
| 0.60864000000000012 | 0.34020999999999990 | 0.00679000000000023 | F | F | F |
| 0.60864000000000012 | 0.02035999999999966 | 0.09011999999999989 | F | F | F |
| 0.10864000000000012 | 0.49499999999999974 | 0.14826999999999966 | F | F | F |
| 0.10864000000000012 | 0.81484999999999999 | 0.06494000000000000 | F | F | F |
| 0.3875668476283004  | 0.3147801450375483  | 0.3120407499546771  | T | T | T |
| 0.3986056686388846  | 0.6233940064902848  | 0.2347767618751641  | T | T | T |
| 0.8912115829070196  | 0.2018805164840667  | 0.1713429899658439  | T | T | T |
| 0.8916179138489425  | 0.8432070198883360  | 0.2648407461158352  | T | T | T |
| 0.6096373802137300  | 0.7016485888571241  | 0.1709108243844668  | T | T | T |
| 0.6128867888277139  | 0.3248534851293932  | 0.2645345407485211  | T | T | T |
| 0.1222080014907163  | 0.8329634288441912  | 0.3152064018580347  | T | T | T |
| 0.1027578933603817  | 0.1397065960940634  | 0.2357787107403510  | T | T | T |
| 0.32639999999999996 | 0.71737000000000025 | 0.05299999999999973 | F | F | F |
| 0.32639999999999996 | 0.39752000000000001 | 0.13633000000000010 | F | F | F |
| 0.82639999999999996 | 0.43769000000000035 | 0.01872999999999979 | F | F | F |
| 0.82639999999999996 | 0.11784000000000011 | 0.10206000000000016 | F | F | F |
| 0.67360000000000004 | 0.61784000000000011 | 0.10206000000000016 | F | F | F |
| 0.67360000000000004 | 0.93769000000000035 | 0.01872999999999979 | F | F | F |
| 0.1708454540146606  | 0.8953666740409231  | 0.1379127265056733  | T | T | T |
| 0.17360000000000004 | 0.21737000000000025 | 0.05299999999999973 | F | F | F |
| 0.40494999999999995 | 0.58973000000000030 | 0.15988000000000011 | F | F | F |
| 0.40494999999999995 | 0.90957999999999983 | 0.07654999999999975 | F | F | F |
| 0.90494999999999995 | 0.60578000000000029 | 0.16185000000000012 | F | F | F |
| 0.90494999999999995 | 0.92562999999999982 | 0.07851000000000014 | F | F | F |
| 0.59505000000000005 | 0.10578000000000029 | 0.16185000000000012 | F | F | F |
| 0.59505000000000005 | 0.42562999999999982 | 0.07851000000000014 | F | F | F |
| 0.09505000000000005 | 0.08973000000000030 | 0.15988000000000011 | F | F | F |
| 0.09505000000000005 | 0.40957999999999983 | 0.07654999999999975 | F | F | F |
| 0.3286423071473916  | 0.0266222700276177  | 0.2205776761836161  | T | T | T |
| 0.3409937822163535  | 0.7076704156268376  | 0.3037415677059340  | T | T | T |
| 0.8279969007966999  | 0.8001356023689935  | 0.1848863015949915  | T | T | T |
| 0.8244843615746099  | 0.4490901394760478  | 0.2673944180698617  | T | T | T |
| 0.6755442683516726  | 0.9435080625359755  | 0.2657330790235162  | T | T | T |
| 0.6723113854771261  | 0.2997266178310151  | 0.1856817171860228  | T | T | T |

|                    |                    |                    |   |   |   |
|--------------------|--------------------|--------------------|---|---|---|
| 0.1524674285154160 | 0.2572478643140741 | 0.3051766506143725 | T | T | T |
| 0.1712854507644221 | 0.5432916999914589 | 0.2211686855806645 | T | T | T |
| 0.3346937161484557 | 0.9280490256564832 | 0.3294554027233192 | T | T | T |
| 0.4083685739437857 | 0.2159366057600266 | 0.2442547680713808 | T | T | T |
| 0.9234763453451179 | 0.8865946463034952 | 0.3298928670160595 | T | T | T |
| 0.8996699625617673 | 0.2540255775222006 | 0.2466084893366443 | T | T | T |
| 0.5720782182131601 | 0.3664475093204062 | 0.3325730510530338 | T | T | T |
| 0.6017839782897226 | 0.7401284540259516 | 0.2463481403269283 | T | T | T |
| 0.0763085258765181 | 0.4310245727216532 | 0.3306603643376805 | T | T | T |
| 0.0959117453660205 | 0.7353256528825415 | 0.2464265477909518 | T | T | T |
| 0.1552532527284073 | 0.5379609136281372 | 0.3670761185806236 | T | T | T |

ReN<sub>2</sub> (110) + \*OH

Re N O H

|                    |                    |                    |
|--------------------|--------------------|--------------------|
| 1.0000000000000000 |                    |                    |
| 9.5357500000000002 | 0.0000000000000000 | 0.0000000000000000 |
| 0.0000000000000000 | 5.0288700000000004 | 0.0000000000000000 |
| 0.0000000000000000 | 0.0000000000000000 | 28.146699999999992 |

Re N O H

16 32 1 1

Selective dynamics

Direct

|                    |                    |                    |   |   |   |
|--------------------|--------------------|--------------------|---|---|---|
| 0.3913599999999988 | 0.9949999999999974 | 0.1482699999999966 | F | F | F |
| 0.3913599999999988 | 0.3148499999999999 | 0.0649400000000000 | F | F | F |
| 0.8913599999999988 | 0.8402099999999990 | 0.0067900000000023 | F | F | F |
| 0.8913599999999988 | 0.5203599999999966 | 0.0901199999999989 | F | F | F |
| 0.6086400000000012 | 0.3402099999999990 | 0.0067900000000023 | F | F | F |
| 0.6086400000000012 | 0.0203599999999966 | 0.0901199999999989 | F | F | F |
| 0.1086400000000012 | 0.4949999999999974 | 0.1482699999999966 | F | F | F |
| 0.1086400000000012 | 0.8148499999999999 | 0.0649400000000000 | F | F | F |
| 0.3998593724523081 | 0.3024170179200893 | 0.3135499977537446 | T | T | T |
| 0.3945465484717516 | 0.6357322587221581 | 0.2355217679994939 | T | T | T |
| 0.8915840914065665 | 0.2027319052295911 | 0.1711565620995013 | T | T | T |
| 0.8848290341964422 | 0.8448996136424669 | 0.2613135429369841 | T | T | T |
| 0.6081192508433021 | 0.7022487793630687 | 0.1705137865857996 | T | T | T |
| 0.6133318920077218 | 0.3463501269155332 | 0.2626367200912976 | T | T | T |
| 0.0965903179299204 | 0.8297365497115152 | 0.3126368744372765 | T | T | T |
| 0.1050990002843991 | 0.1380756325816220 | 0.2362816948876258 | T | T | T |
| 0.3263999999999996 | 0.7173700000000025 | 0.0529999999999973 | F | F | F |
| 0.3263999999999996 | 0.3975200000000001 | 0.1363300000000010 | F | F | F |
| 0.8263999999999996 | 0.4376900000000035 | 0.0187299999999979 | F | F | F |
| 0.8263999999999996 | 0.1178400000000011 | 0.1020600000000016 | F | F | F |

|                    |                    |                    |   |   |   |
|--------------------|--------------------|--------------------|---|---|---|
| 0.6736000000000004 | 0.6178400000000011 | 0.1020600000000016 | F | F | F |
| 0.6736000000000004 | 0.9376900000000035 | 0.0187299999999979 | F | F | F |
| 0.1708212597175985 | 0.8947612065956013 | 0.1381144120719104 | T | T | T |
| 0.1736000000000004 | 0.2173700000000025 | 0.0529999999999973 | F | F | F |
| 0.4049499999999995 | 0.5897300000000030 | 0.1598800000000011 | F | F | F |
| 0.4049499999999995 | 0.9095799999999983 | 0.0765499999999975 | F | F | F |
| 0.9049499999999995 | 0.6057800000000029 | 0.1618500000000012 | F | F | F |
| 0.9049499999999995 | 0.9256299999999982 | 0.0785100000000014 | F | F | F |
| 0.5950500000000005 | 0.1057800000000029 | 0.1618500000000012 | F | F | F |
| 0.5950500000000005 | 0.4256299999999982 | 0.0785100000000014 | F | F | F |
| 0.0950500000000005 | 0.0897300000000030 | 0.1598800000000011 | F | F | F |
| 0.0950500000000005 | 0.4095799999999983 | 0.0765499999999975 | F | F | F |
| 0.3278477332473942 | 0.0396345944597940 | 0.2209378960386864 | T | T | T |
| 0.3338170193126044 | 0.7260690065951002 | 0.3105638355130287 | T | T | T |
| 0.8267217770734366 | 0.8008517108644656 | 0.1847289310675148 | T | T | T |
| 0.8264740110702135 | 0.4614899647533086 | 0.2650957195825042 | T | T | T |
| 0.6740701012086442 | 0.9548297461014138 | 0.2651560028107110 | T | T | T |
| 0.6733056252483387 | 0.3007593737671977 | 0.1843127967573527 | T | T | T |
| 0.1663801100052421 | 0.2365007550978396 | 0.3095241801983189 | T | T | T |
| 0.1717673804743339 | 0.5380896634566470 | 0.2210935012478036 | T | T | T |
| 0.3905688139152199 | 0.9458460072779377 | 0.3276636586518197 | T | T | T |
| 0.4076665956675380 | 0.2288512321470743 | 0.2446619141948182 | T | T | T |
| 0.9111472752772307 | 0.9042765188339035 | 0.3293122433524762 | T | T | T |
| 0.9013737904419350 | 0.2617114907800460 | 0.2457556557413520 | T | T | T |
| 0.5908015695761082 | 0.3995376379360047 | 0.3287802568950389 | T | T | T |
| 0.5982797839813502 | 0.7579373593761908 | 0.2457170807026245 | T | T | T |
| 0.0887920332817544 | 0.4401475642975928 | 0.3280908405968783 | T | T | T |
| 0.0913808886473277 | 0.7305376000497454 | 0.2441499410580525 | T | T | T |
| 0.1295550031734876 | 0.5231553753980417 | 0.3772423271915735 | T | T | T |
| 0.2342563619891198 | 0.5103022459926139 | 0.3775587072687872 | T | T | T |

ReN<sub>2</sub> (100) - Surface

Re N

|                    |                    |                     |
|--------------------|--------------------|---------------------|
| 1.0000000000000000 |                    |                     |
| 3.6890100000000001 | 0.0000000000000000 | 0.0000000000000000  |
| 0.5760683759820097 | 5.7184370321437870 | 0.0000000000000000  |
| 0.0000000000000000 | 0.0000000000000000 | 31.1944000000000017 |

Re N

8 16

Selective dynamics

Direct

|                    |                    |                    |   |   |   |
|--------------------|--------------------|--------------------|---|---|---|
| 0.2131200000000035 | 0.7777299999999983 | 0.0386299999999977 | F | F | F |
|--------------------|--------------------|--------------------|---|---|---|

|                     |                    |                    |   |   |   |
|---------------------|--------------------|--------------------|---|---|---|
| 0.616999999999973   | 0.233199999999965  | 0.009509999999988  | F | F | F |
| 0.919100000000003   | 0.796649999999996  | 0.121969999999975  | F | F | F |
| 0.322969999999980   | 0.252110000000018  | 0.092849999999985  | F | F | F |
| 0.6207282129553875  | 0.8171167160285093 | 0.2054171499885287 | T | T | T |
| 0.0281657429345899  | 0.2700029551515175 | 0.1763376370339614 | T | T | T |
| 0.3064345371346194  | 0.8381566180521710 | 0.2886277937575879 | T | T | T |
| 0.7199580003062069  | 0.2856907802097500 | 0.2628452175247672 | T | T | T |
| 0.7018750934457765  | 0.8841296739447463 | 0.0141329256172098 | T | T | T |
| 0.131560000000003   | 0.142940000000030  | 0.034649999999992  | F | F | F |
| 0.602679999999994   | 0.484420000000001  | 0.057659999999985  | F | F | F |
| 0.933419999999981   | 0.545430000000032  | 0.073819999999978  | F | F | F |
| 0.404539999999972   | 0.886910000000003  | 0.096829999999971  | F | F | F |
| 0.837530000000010   | 0.161859999999972  | 0.117980000000029  | F | F | F |
| 0.308650000000001   | 0.503329999999983  | 0.140999999999982  | F | F | F |
| 0.639389999999988   | 0.564349999999975  | 0.157150000000015  | F | F | F |
| 0.1046825920575910  | 0.9021376859371317 | 0.1812413765397526 | T | T | T |
| 0.5428810723538408  | 0.1840639950950401 | 0.2009682820144004 | T | T | T |
| 0.0040496692307065  | 0.5199875123089758 | 0.2254317440548591 | T | T | T |
| 0.3337295196607157  | 0.5818940810389419 | 0.2421030477659352 | T | T | T |
| 0.8061651799745798  | 0.9252445376267977 | 0.2625798856681270 | T | T | T |
| 0.2424643869171555  | 0.1895698086268543 | 0.2828082931858699 | T | T | T |
| 0.7158884382921356  | 0.5545132992254156 | 0.3102451303135826 | T | T | T |
| -0.0150920761160732 | 0.6558094138219490 | 0.3207122865742306 | T | T | T |

ReN<sub>2</sub> (100) + \*OOH

Re N O H

|                    |                    |                    |  |
|--------------------|--------------------|--------------------|--|
| 1.000000000000000  |                    |                    |  |
| 3.689010000000001  | 0.000000000000000  | 0.000000000000000  |  |
| 0.5760683759820097 | 5.7184370321437870 | 0.000000000000000  |  |
| 0.000000000000000  | 0.000000000000000  | 31.194400000000017 |  |

Re N O H

8 16 2 1

Selective dynamics

Direct

|                    |                    |                    |   |   |   |
|--------------------|--------------------|--------------------|---|---|---|
| 0.213120000000035  | 0.777729999999983  | 0.038629999999977  | F | F | F |
| 0.616999999999973  | 0.233199999999965  | 0.009509999999988  | F | F | F |
| 0.919100000000003  | 0.796649999999996  | 0.121969999999975  | F | F | F |
| 0.322969999999980  | 0.252110000000018  | 0.092849999999985  | F | F | F |
| 0.6218214963448626 | 0.8162649496358347 | 0.2049048998713242 | T | T | T |
| 0.0253453523580539 | 0.2728623479111080 | 0.1767867952104470 | T | T | T |
| 0.3285240077268849 | 0.8684041915518126 | 0.2865475731440794 | T | T | T |
| 0.7135110136886410 | 0.2871729892102804 | 0.2607239831087226 | T | T | T |

|                     |                    |                    |   |   |   |
|---------------------|--------------------|--------------------|---|---|---|
| 0.6985600000000005  | 0.8679899999999989 | 0.0135000000000005 | F | F | F |
| 0.1315600000000003  | 0.1429400000000030 | 0.0346499999999992 | F | F | F |
| 0.6026799999999994  | 0.4844200000000001 | 0.0576599999999985 | F | F | F |
| 0.9334199999999981  | 0.5454300000000032 | 0.0738199999999978 | F | F | F |
| 0.4045399999999972  | 0.8869100000000003 | 0.0968299999999971 | F | F | F |
| 0.8375300000000010  | 0.1618599999999972 | 0.1179800000000029 | F | F | F |
| 0.3086500000000001  | 0.5033299999999983 | 0.1409999999999982 | F | F | F |
| 0.6393899999999988  | 0.5643499999999975 | 0.1571500000000015 | F | F | F |
| 0.1044284481185767  | 0.9035840835811676 | 0.1808739773985784 | T | T | T |
| 0.5409484302244641  | 0.1850931699353654 | 0.2010566987507675 | T | T | T |
| 0.0047845064551540  | 0.5251349129318538 | 0.2267393686411101 | T | T | T |
| 0.3347099995441348  | 0.5876514095658367 | 0.2439923024085149 | T | T | T |
| 0.8090677514390933  | 0.9286788332324306 | 0.2615597163860062 | T | T | T |
| 0.2280839490309932  | 0.2025492363258521 | 0.2832367289115693 | T | T | T |
| 0.7140266154138382  | 0.6644858622608356 | 0.3225914548833416 | T | T | T |
| -0.0062391126597465 | 0.7635180843903023 | 0.3393543963749508 | T | T | T |
| 0.6963814482033783  | 0.4418298314173206 | 0.3302819856927169 | T | T | T |
| 0.1372230312694901  | 0.6466254466751992 | 0.3750994563929075 | T | T | T |
| 0.0585211648975094  | 0.4865518177769930 | 0.3718620715611442 | T | T | T |

ReN<sub>2</sub> (100) + \*O

Re N O

1.0000000000000000

3.6890100000000001 0.0000000000000000 0.0000000000000000

0.5760683759820097 5.7184370321437870 0.0000000000000000

0.0000000000000000 0.0000000000000000 31.1944000000000017

Re N O

8 16 1

Selective dynamics

Direct

|                    |                    |                    |   |   |   |
|--------------------|--------------------|--------------------|---|---|---|
| 0.2131200000000035 | 0.7777299999999983 | 0.0386299999999977 | F | F | F |
| 0.6169999999999973 | 0.2331999999999965 | 0.0095099999999988 | F | F | F |
| 0.9191000000000003 | 0.7966499999999996 | 0.1219699999999975 | F | F | F |
| 0.3229699999999980 | 0.2521100000000018 | 0.0928499999999985 | F | F | F |
| 0.6215867100548180 | 0.8162147471646610 | 0.2047503797679312 | T | T | T |
| 0.0244786468666147 | 0.2723706515620913 | 0.1767604632642359 | T | T | T |
| 0.3239721140222902 | 0.8681859747798203 | 0.2885215610150823 | T | T | T |
| 0.7217387740441704 | 0.2847186591871763 | 0.2612282167450146 | T | T | T |
| 0.6985600000000005 | 0.8679899999999989 | 0.0135000000000005 | F | F | F |
| 0.1315600000000003 | 0.1429400000000030 | 0.0346499999999992 | F | F | F |
| 0.6026799999999994 | 0.4844200000000001 | 0.0576599999999985 | F | F | F |
| 0.9334199999999981 | 0.5454300000000032 | 0.0738199999999978 | F | F | F |

|                    |                    |                    |   |   |   |
|--------------------|--------------------|--------------------|---|---|---|
| 0.4045399999999972 | 0.8869100000000003 | 0.0968299999999971 | F | F | F |
| 0.8375300000000010 | 0.1618599999999972 | 0.1179800000000029 | F | F | F |
| 0.3086500000000001 | 0.5033299999999983 | 0.1409999999999982 | F | F | F |
| 0.6393899999999988 | 0.5643499999999975 | 0.1571500000000015 | F | F | F |
| 0.1033544268241163 | 0.9026826727463945 | 0.1810171393954693 | T | T | T |
| 0.5387748059280750 | 0.1847153631261071 | 0.2009620528668367 | T | T | T |
| 0.0101203094098646 | 0.5232389293819530 | 0.2272229209432411 | T | T | T |
| 0.3438002727016932 | 0.5850112393405561 | 0.2440722988613080 | T | T | T |
| 0.8130168210504648 | 0.9297348469087084 | 0.2602813858364435 | T | T | T |
| 0.2304870463902696 | 0.1997537632381247 | 0.2832097350919961 | T | T | T |
| 0.7180015545713898 | 0.6690438857302771 | 0.3218944149859458 | T | T | T |
| 0.0138180482885943 | 0.7455998210668672 | 0.3316983943944709 | T | T | T |
| 0.6968497136807680 | 0.4386467619547831 | 0.3248762962172579 | T | T | T |

ReN<sub>2</sub> (100) + \*OH

Re N O H

|                    |                    |                     |  |  |  |
|--------------------|--------------------|---------------------|--|--|--|
| 1.0000000000000000 |                    |                     |  |  |  |
| 3.6890100000000001 | 0.0000000000000000 | 0.0000000000000000  |  |  |  |
| 0.5760683759820097 | 5.7184370321437870 | 0.0000000000000000  |  |  |  |
| 0.0000000000000000 | 0.0000000000000000 | 31.1944000000000017 |  |  |  |

Re N O H

8 16 1 1

Selective dynamics

Direct

|                    |                    |                    |   |   |   |
|--------------------|--------------------|--------------------|---|---|---|
| 0.2131200000000035 | 0.7777299999999983 | 0.0386299999999977 | F | F | F |
| 0.6169999999999973 | 0.2331999999999965 | 0.0095099999999988 | F | F | F |
| 0.9191000000000003 | 0.7966499999999996 | 0.1219699999999975 | F | F | F |
| 0.3229699999999980 | 0.2521100000000018 | 0.0928499999999985 | F | F | F |
| 0.6212123415363787 | 0.8151246983031359 | 0.2050620548611697 | T | T | T |
| 0.0278621114640001 | 0.2717963995883196 | 0.1762056374705980 | T | T | T |
| 0.3082421524656795 | 0.8600259300513524 | 0.2892175737326454 | T | T | T |
| 0.7083798642297430 | 0.2832790792778055 | 0.2604837817163280 | T | T | T |
| 0.6985600000000005 | 0.8679899999999989 | 0.0135000000000005 | F | F | F |
| 0.1315600000000003 | 0.1429400000000030 | 0.0346499999999992 | F | F | F |
| 0.6026799999999994 | 0.4844200000000001 | 0.0576599999999985 | F | F | F |
| 0.9334199999999981 | 0.5454300000000032 | 0.0738199999999978 | F | F | F |
| 0.4045399999999972 | 0.8869100000000003 | 0.0968299999999971 | F | F | F |
| 0.8375300000000010 | 0.1618599999999972 | 0.1179800000000029 | F | F | F |
| 0.3086500000000001 | 0.5033299999999983 | 0.1409999999999982 | F | F | F |
| 0.6393899999999988 | 0.5643499999999975 | 0.1571500000000015 | F | F | F |
| 0.1050131084864591 | 0.9025238252341781 | 0.1811611532141001 | T | T | T |
| 0.5401543192137392 | 0.1817717795279482 | 0.2008904605419021 | T | T | T |

|                    |                    |                    |   |   |   |
|--------------------|--------------------|--------------------|---|---|---|
| 0.0056752546076472 | 0.5209743417036046 | 0.2265917399948451 | T | T | T |
| 0.3392568297610872 | 0.5845718546534405 | 0.2437488982865271 | T | T | T |
| 0.7975004236015557 | 0.9156887285332136 | 0.2627314305238121 | T | T | T |
| 0.2232696223905765 | 0.2045839682119229 | 0.2827214760986003 | T | T | T |
| 0.6812322956212593 | 0.7314443638462236 | 0.3348148357177989 | T | T | T |
| 0.0119693296155256 | 0.7604613474493688 | 0.3352910005738013 | T | T | T |
| 0.5893396129341151 | 0.5806434013617434 | 0.3704460561850645 | T | T | T |
| 0.8347867526381302 | 0.5485156206292771 | 0.3831459699985652 | T | T | T |

ReN<sub>2</sub> (110) - Surface

Re N

|                    |                    |                     |
|--------------------|--------------------|---------------------|
| 1.0000000000000000 |                    |                     |
| 5.5853799999999998 | 0.0000000000000000 | 0.0000000000000000  |
| 1.4576319424392254 | 5.4095059961960343 | 0.0000000000000000  |
| 0.0000000000000000 | 0.0000000000000000 | 26.6293000000000006 |

Re N

8 16

Selective dynamics

Direct

|                     |                    |                    |   |   |   |
|---------------------|--------------------|--------------------|---|---|---|
| 0.9952600000000018  | 0.8038200000000018 | 0.0037700000000029 | F | F | F |
| 0.2003500000000003  | 0.0179600000000022 | 0.0870999999999995 | F | F | F |
| 0.5982199999999978  | 0.4092899999999986 | 0.0456100000000035 | F | F | F |
| 0.8033100000000033  | 0.6234299999999990 | 0.1289400000000001 | F | F | F |
| 0.4050002476502463  | 0.2213888331013139 | 0.1696897452725484 | T | T | T |
| 0.6106361358580811  | 0.4208062126728720 | 0.2467419719891142 | T | T | T |
| -0.0150405257809287 | 0.7946480940932730 | 0.2102161573765217 | T | T | T |
| 0.2100530893711112  | 0.0208768526407419 | 0.2815693562420402 | T | T | T |
| 0.4185500000000033  | 0.2233200000000011 | 0.0858699999999999 | F | F | F |
| 0.2134599999999978  | 0.0091899999999967 | 0.0025300000000001 | F | F | F |
| 0.1101373072023948  | 0.4995196919580192 | 0.1640049248954823 | T | T | T |
| 0.9019699999999986  | 0.2868899999999996 | 0.0791299999999993 | F | F | F |
| 0.6874334509060054  | 0.9228016931723327 | 0.1640848713142737 | T | T | T |
| 0.4946500000000000  | 0.7062200000000018 | 0.0808000000000035 | F | F | F |
| 0.1814699999999974  | 0.9903400000000033 | 0.1567099999999968 | F | F | F |
| 0.9763799999999989  | 0.7762099999999990 | 0.0733800000000002 | F | F | F |
| 0.8225302588897074  | 0.6327256830623960 | 0.2495176583065038 | T | T | T |
| 0.6303105965372509  | 0.4413831669653528 | 0.1735485120189233 | T | T | T |
| 0.5973369035126175  | 0.4361020881419608 | 0.3710659127120705 | T | T | T |
| 0.3113175239306643  | 0.7051894744186602 | 0.2514532573110095 | T | T | T |
| 0.2417826952873683  | 0.0506674957391883 | 0.3451129238035509 | T | T | T |
| 0.8932796337768534  | 0.1211258739968646 | 0.2514046656483295 | T | T | T |
| 0.6046103454061943  | 0.4259806284255657 | 0.3292120540079462 | T | T | T |

0.3866909499162758 0.1994005837923985 0.2443278745297735 T T T  
ReN<sub>2</sub> (110) + \*OOH

Re N O H

1.0000000000000000

5.5853799999999998 0.0000000000000000 0.0000000000000000

1.4576319424392254 5.4095059961960343 0.0000000000000000

0.0000000000000000 0.0000000000000000 26.6293000000000006

Re N O H

8 16 2 1

Selective dynamics

Direct

|                     |                    |                    |   |   |   |
|---------------------|--------------------|--------------------|---|---|---|
| 0.9952600000000018  | 0.8038200000000018 | 0.0037700000000029 | F | F | F |
| 0.2003500000000003  | 0.0179600000000022 | 0.0870999999999995 | F | F | F |
| 0.5982199999999978  | 0.4092899999999986 | 0.0456100000000035 | F | F | F |
| 0.8033100000000033  | 0.6234299999999990 | 0.1289400000000001 | F | F | F |
| 0.4109619610170633  | 0.2204048029238714 | 0.1714437879066771 | T | T | T |
| 0.5980477840261028  | 0.4476705032722034 | 0.2472489759174860 | T | T | T |
| -0.0048066097950872 | 0.8161318582367582 | 0.2123423485516927 | T | T | T |
| 0.1956865001247173  | 0.0722907157119770 | 0.2930123285282096 | T | T | T |
| 0.4185500000000033  | 0.2233200000000011 | 0.0858699999999999 | F | F | F |
| 0.2134599999999978  | 0.0091899999999967 | 0.0025300000000001 | F | F | F |
| 0.1070500000000010  | 0.5010199999999969 | 0.1624600000000029 | F | F | F |
| 0.9019699999999986  | 0.2868899999999996 | 0.0791299999999993 | F | F | F |
| 0.6850948854836111  | 0.9260778110822305 | 0.1625379414945685 | T | T | T |
| 0.4946500000000000  | 0.7062200000000018 | 0.0808000000000035 | F | F | F |
| 0.1814699999999974  | 0.9903400000000033 | 0.1567099999999968 | F | F | F |
| 0.9763799999999989  | 0.7762099999999990 | 0.0733800000000002 | F | F | F |
| 0.8264062185853288  | 0.6405770511066868 | 0.2475382804491583 | T | T | T |
| 0.6294298631573494  | 0.4406350016631216 | 0.1714039044699230 | T | T | T |
| 0.3747682388083254  | 0.7662206184356746 | 0.3389491440293275 | T | T | T |
| 0.3109156493904758  | 0.7016052489460527 | 0.2392532954799645 | T | T | T |
| 0.1401250930659446  | 0.2803001679695279 | 0.3408210067396075 | T | T | T |
| 0.8993409588363310  | 0.1245750826383918 | 0.2556873129957876 | T | T | T |
| 0.5102386756372898  | 0.5783824422375928 | 0.3245240041181464 | T | T | T |
| 0.3907215067984818  | 0.1929768741284094 | 0.2467856645207453 | T | T | T |
| 0.5926420327770514  | 0.3586368504050159 | 0.3666409574348868 | T | T | T |
| 0.4470350673219419  | 0.4247321563979851 | 0.4093317287126665 | T | T | T |
| 0.2898621237225394  | 0.3859508479928606 | 0.3980182021018165 | T | T | T |

ReN<sub>2</sub> (110) + \*O

Re N O



1.0000000000000000  
5.5853799999999998 0.0000000000000000 0.0000000000000000  
1.4576319424392254 5.4095059961960343 0.0000000000000000  
0.0000000000000000 0.0000000000000000 26.6293000000000006

Re N O  
8 16 1

Selective dynamics

Direct

|                     |                     |                    |   |   |   |
|---------------------|---------------------|--------------------|---|---|---|
| 0.9952600000000018  | 0.8038200000000018  | 0.0037700000000029 | F | F | F |
| 0.2003500000000003  | 0.0179600000000022  | 0.0870999999999995 | F | F | F |
| 0.5982199999999978  | 0.4092899999999986  | 0.0456100000000035 | F | F | F |
| 0.80331000000000033 | 0.6234299999999990  | 0.1289400000000001 | F | F | F |
| 0.4117873896113739  | 0.2183033352706387  | 0.1713207042083083 | T | T | T |
| 0.6090694207155881  | 0.4431268634991717  | 0.2489719539593910 | T | T | T |
| 0.0030888678344999  | 0.8165382498864234  | 0.2127298325790517 | T | T | T |
| 0.1943850436736283  | 0.0947919430475362  | 0.2945469857155896 | T | T | T |
| 0.41855000000000033 | 0.2233200000000011  | 0.0858699999999999 | F | F | F |
| 0.2134599999999978  | 0.0091899999999967  | 0.0025300000000001 | F | F | F |
| 0.1070500000000010  | 0.5010199999999969  | 0.1624600000000029 | F | F | F |
| 0.9019699999999986  | 0.2868899999999996  | 0.0791299999999993 | F | F | F |
| 0.6850943098132856  | 0.9230203053837934  | 0.1619126353894227 | T | T | T |
| 0.4946500000000000  | 0.7062200000000018  | 0.0808000000000035 | F | F | F |
| 0.1814699999999974  | 0.99034000000000033 | 0.1567099999999968 | F | F | F |
| 0.9763799999999989  | 0.7762099999999990  | 0.0733800000000002 | F | F | F |
| 0.8317013955641408  | 0.6402849880076447  | 0.2480539281882629 | T | T | T |
| 0.6322614099479301  | 0.4393719562406692  | 0.1735299138356198 | T | T | T |
| 0.3764942071558273  | 0.8033539181874497  | 0.3391913906395130 | T | T | T |
| 0.3099712913263790  | 0.7007666820264450  | 0.2375606605947359 | T | T | T |
| 0.1415847964561358  | 0.3211771565361483  | 0.3385688752552511 | T | T | T |
| 0.9048902567992838  | 0.1236927459904100  | 0.2556929145504772 | T | T | T |
| 0.5007937355309854  | 0.6134097574201590  | 0.3195272159788572 | T | T | T |
| 0.3930752146267715  | 0.1938605008977946  | 0.2462476485194209 | T | T | T |
| 0.6234488001912804  | 0.4048345924779033  | 0.3367592832551249 | T | T | T |

ReN<sub>2</sub> (110) + \*OH

Re N O H

1.0000000000000000  
5.5853799999999998 0.0000000000000000 0.0000000000000000  
1.4576319424392254 5.4095059961960343 0.0000000000000000  
0.0000000000000000 0.0000000000000000 26.6293000000000006

Re N O H  
8 16 1 1

Selective dynamics

Direct

|                     |                    |                    |   |   |   |
|---------------------|--------------------|--------------------|---|---|---|
| 0.9952600000000018  | 0.8038200000000018 | 0.0037700000000029 | F | F | F |
| 0.2003500000000003  | 0.0179600000000022 | 0.0870999999999995 | F | F | F |
| 0.5982199999999978  | 0.4092899999999986 | 0.0456100000000035 | F | F | F |
| 0.8033100000000033  | 0.6234299999999990 | 0.1289400000000001 | F | F | F |
| 0.4109898767392704  | 0.2219050414463382 | 0.1711401354913861 | T | T | T |
| 0.5949702929391465  | 0.4524933278018977 | 0.2476438405954873 | T | T | T |
| -0.0061015359690463 | 0.8157825209225020 | 0.2118337588737423 | T | T | T |
| 0.1917034918859999  | 0.0760600297558157 | 0.2918451120897698 | T | T | T |
| 0.4185500000000033  | 0.2233200000000011 | 0.0858699999999999 | F | F | F |
| 0.2134599999999978  | 0.0091899999999967 | 0.0025300000000001 | F | F | F |
| 0.1070500000000010  | 0.5010199999999969 | 0.1624600000000029 | F | F | F |
| 0.9019699999999986  | 0.2868899999999996 | 0.0791299999999993 | F | F | F |
| 0.6851047685239618  | 0.9274385288980870 | 0.1623653653508818 | T | T | T |
| 0.4946500000000000  | 0.7062200000000018 | 0.0808000000000035 | F | F | F |
| 0.1814699999999974  | 0.9903400000000033 | 0.1567099999999968 | F | F | F |
| 0.9763799999999989  | 0.7762099999999990 | 0.0733800000000002 | F | F | F |
| 0.8265339329543943  | 0.6409578736223250 | 0.2474201535348537 | T | T | T |
| 0.6280758220718681  | 0.4427435999973792 | 0.1715420369279786 | T | T | T |
| 0.3826163910292143  | 0.7922125398242915 | 0.3391036300642212 | T | T | T |
| 0.3094762686862914  | 0.7033724748455108 | 0.2401435263124670 | T | T | T |
| 0.1108871686646469  | 0.2895917224122225 | 0.3388712398106496 | T | T | T |
| 0.8965135866585322  | 0.1238968843231890 | 0.2543931205913827 | T | T | T |
| 0.5257389149898596  | 0.5954315987659163 | 0.3268084001753765 | T | T | T |
| 0.3904122515854999  | 0.1963065245776527 | 0.2468122647228020 | T | T | T |
| 0.6364869584918769  | 0.4525244304866297 | 0.3676065082461817 | T | T | T |
| 0.8163892823410905  | 0.3752458947029488 | 0.3571156758187644 | T | T | T |

Ta<sub>4</sub>N<sub>5</sub> (100) - Surface

Ta N

|                     |                     |                     |
|---------------------|---------------------|---------------------|
| 1.0000000000000000  |                     |                     |
| 5.3044300000000000  | 0.0000000000000000  | 0.0000000000000000  |
| -1.7217108756555533 | 10.4682601644518467 | 0.0000000000000000  |
| 0.0000000000000000  | 0.0000000000000000  | 29.0263999999999989 |

Ta N

16 20

Selective dynamics

Direct

|                    |                    |                    |   |   |   |
|--------------------|--------------------|--------------------|---|---|---|
| 0.4209499999999977 | 0.1852000000000018 | 0.1081599999999980 | F | F | F |
| 0.6827699999999979 | 0.3749899999999968 | 0.0316600000000022 | F | F | F |
| 0.4004100000000008 | 0.0834199999999967 | 0.0055800000000019 | F | F | F |

|                    |                    |                    |   |   |   |
|--------------------|--------------------|--------------------|---|---|---|
| 0.941499999999978  | 0.133580000000020  | 0.054070000000029  | F | F | F |
| 0.7293945299761371 | 0.0253256138761432 | 0.2248795493669699 | T | T | T |
| 0.9797561354880421 | 0.2337824995001521 | 0.1596537185260631 | T | T | T |
| 0.6843300000000028 | 0.444809999999968  | 0.1267700000000005 | F | F | F |
| 0.2270848349327307 | 0.4899560369975882 | 0.1877397014666781 | T | T | T |
| 0.420949999999977  | 0.685200000000018  | 0.108159999999980  | F | F | F |
| 0.682769999999979  | 0.874989999999968  | 0.0316600000000022 | F | F | F |
| 0.4004100000000008 | 0.583419999999967  | 0.0055800000000019 | F | F | F |
| 0.941499999999978  | 0.6335800000000020 | 0.0540700000000029 | F | F | F |
| 0.7284865580429214 | 0.5252959440318942 | 0.2246416295849823 | T | T | T |
| 0.9798648902380231 | 0.7341227856704416 | 0.1594608338086255 | T | T | T |
| 0.6871424286372603 | 0.9457587400216104 | 0.1272816820282708 | T | T | T |
| 0.2282704237497118 | 0.9895853888853610 | 0.1878484195350666 | T | T | T |
| 0.041589999999993  | 0.479199999999987  | 0.018619999999985  | F | F | F |
| 0.808259999999971  | 0.289409999999966  | 0.092649999999990  | F | F | F |
| 0.0526100000000014 | 0.065959999999969  | 0.119419999999981  | F | F | F |
| 0.309829999999981  | 0.252819999999998  | 0.0428100000000029 | F | F | F |
| 0.5541800000000023 | 0.0293700000000001 | 0.0695800000000020 | F | F | F |
| 0.3302560599278107 | 0.3407017770660904 | 0.1447578040954387 | T | T | T |
| 0.0596889098344560 | 0.1447416678722797 | 0.2165207728875129 | T | T | T |
| 0.3826484039440496 | 0.4603231849662598 | 0.2448066410449466 | T | T | T |
| 0.5940704283861260 | 0.1081741252086533 | 0.1699572647403677 | T | T | T |
| 0.8469137910579571 | 0.3845484746072056 | 0.1935415878155295 | T | T | T |
| 0.041589999999993  | 0.979199999999987  | 0.018619999999985  | F | F | F |
| 0.808259999999971  | 0.789409999999966  | 0.092649999999990  | F | F | F |
| 0.0526100000000014 | 0.565959999999969  | 0.119419999999981  | F | F | F |
| 0.309829999999981  | 0.752819999999998  | 0.0428100000000029 | F | F | F |
| 0.5541800000000023 | 0.5293700000000001 | 0.0695800000000020 | F | F | F |
| 0.3313426024605365 | 0.8406958754183049 | 0.1448369799798296 | T | T | T |
| 0.0586615641431515 | 0.6445739564499532 | 0.2164762573482146 | T | T | T |
| 0.3835494627130667 | 0.9601049174652603 | 0.2449417250790676 | T | T | T |
| 0.5936575850349639 | 0.6077047783871582 | 0.1696805552662060 | T | T | T |
| 0.8478824153304869 | 0.8844614534460663 | 0.1937895968770303 | T | T | T |

Ta<sub>4</sub>N<sub>5</sub> (100) + \*OOH

Ta N O H

|                     |                     |                    |
|---------------------|---------------------|--------------------|
| 1.0000000000000000  |                     |                    |
| 5.3044300000000000  | 0.0000000000000000  | 0.0000000000000000 |
| -1.7217108756555533 | 10.4682601644518467 | 0.0000000000000000 |
| 0.0000000000000000  | 0.0000000000000000  | 29.026399999999989 |

Ta N O H

16 20 2 1

Selective dynamics

Direct

|                     |                    |                    |   |   |   |
|---------------------|--------------------|--------------------|---|---|---|
| 0.4209499999999977  | 0.1852000000000018 | 0.1081599999999980 | F | F | F |
| 0.6827699999999979  | 0.3749899999999968 | 0.0316600000000022 | F | F | F |
| 0.4004100000000008  | 0.0834199999999967 | 0.0055800000000019 | F | F | F |
| 0.9414999999999978  | 0.1335800000000020 | 0.0540700000000029 | F | F | F |
| 0.7391275914174196  | 0.0169645030476789 | 0.2321435901033642 | T | T | T |
| 0.9656661388608900  | 0.2316897488196463 | 0.1597575068775549 | T | T | T |
| 0.6867299999999972  | 0.4461799999999982 | 0.1268699999999967 | F | F | F |
| 0.2292619089921453  | 0.4879688303568764 | 0.1872138564076358 | T | T | T |
| 0.4209499999999977  | 0.6852000000000018 | 0.1081599999999980 | F | F | F |
| 0.6827699999999979  | 0.8749899999999968 | 0.0316600000000022 | F | F | F |
| 0.4004100000000008  | 0.5834199999999967 | 0.0055800000000019 | F | F | F |
| 0.9414999999999978  | 0.6335800000000020 | 0.0540700000000029 | F | F | F |
| 0.7299870545739542  | 0.5254077399690589 | 0.2252735932339603 | T | T | T |
| 0.9807800323400446  | 0.7334556596396204 | 0.1605306128204050 | T | T | T |
| 0.6822900000000018  | 0.9438999999999993 | 0.1272599999999997 | F | F | F |
| 0.2216252961768428  | 0.0017394317349951 | 0.1785683635610553 | T | T | T |
| 0.0415899999999993  | 0.4791999999999987 | 0.0186199999999985 | F | F | F |
| 0.8082599999999971  | 0.2894099999999966 | 0.0926499999999990 | F | F | F |
| 0.0526100000000014  | 0.0659599999999969 | 0.1194199999999981 | F | F | F |
| 0.3098299999999981  | 0.2528199999999998 | 0.0428100000000029 | F | F | F |
| 0.5541800000000023  | 0.0293700000000001 | 0.0695800000000020 | F | F | F |
| 0.3302699999999987  | 0.3409100000000009 | 0.1444499999999991 | F | F | F |
| 0.0546379115300984  | 0.1369673340461500 | 0.2152919921894385 | T | T | T |
| 0.3839955886262167  | 0.4596749700412768 | 0.2445238471809543 | T | T | T |
| 0.5964706883950361  | 0.1081689283070477 | 0.1683835169754291 | T | T | T |
| 0.8461127965603241  | 0.3850740975421699 | 0.1936746384643554 | T | T | T |
| 0.0415899999999993  | 0.9791999999999987 | 0.0186199999999985 | F | F | F |
| 0.8082599999999971  | 0.7894099999999966 | 0.0926499999999990 | F | F | F |
| 0.0526100000000014  | 0.5659599999999969 | 0.1194199999999981 | F | F | F |
| 0.3098299999999981  | 0.7528199999999998 | 0.0428100000000029 | F | F | F |
| 0.5541800000000023  | 0.5293700000000001 | 0.0695800000000020 | F | F | F |
| 0.3295000000000030  | 0.8411499999999990 | 0.1446200000000033 | F | F | F |
| 0.0616317088539663  | 0.6454556483718391 | 0.2166960608124204 | T | T | T |
| 0.4178469790845848  | 0.0430634554574209 | 0.2627800075759736 | T | T | T |
| 0.5960981570274730  | 0.6077899544676212 | 0.1699910519334608 | T | T | T |
| 0.8472599912896808  | 0.8844734810486017 | 0.1910559217696753 | T | T | T |
| 0.2850453288344365  | 0.0637990999013309 | 0.2952591192023290 | T | T | T |
| -0.1937208770515545 | 0.9236526681415153 | 0.2870140610204387 | T | T | T |
| -0.2877187751473008 | 0.9224636274105491 | 0.3157681337938308 | T | T | T |

Ta<sub>4</sub>N<sub>5</sub> (100) + \*O

Ta N O

|                     |                     |                    |
|---------------------|---------------------|--------------------|
| 1.0000000000000000  |                     |                    |
| 5.3044300000000000  | 0.0000000000000000  | 0.0000000000000000 |
| -1.7217108756555533 | 10.4682601644518467 | 0.0000000000000000 |
| 0.0000000000000000  | 0.0000000000000000  | 29.026399999999989 |

Ta N O

16 20 1

Selective dynamics

Direct

|                    |                     |                    |   |   |   |
|--------------------|---------------------|--------------------|---|---|---|
| 0.4209499999999977 | 0.1852000000000018  | 0.1081599999999980 | F | F | F |
| 0.6827699999999979 | 0.3749899999999968  | 0.0316600000000022 | F | F | F |
| 0.4004100000000008 | 0.0834199999999967  | 0.0055800000000019 | F | F | F |
| 0.9414999999999978 | 0.1335800000000020  | 0.0540700000000029 | F | F | F |
| 0.7356574971649085 | 0.0287723286694636  | 0.2247075621449405 | T | T | T |
| 0.9786921870942978 | 0.2356005936048593  | 0.1580644391246185 | T | T | T |
| 0.6867299999999972 | 0.4461799999999982  | 0.1268699999999967 | F | F | F |
| 0.2274678063399510 | 0.4895655656304688  | 0.1876465051142486 | T | T | T |
| 0.4209499999999977 | 0.6852000000000018  | 0.1081599999999980 | F | F | F |
| 0.6827699999999979 | 0.8749899999999968  | 0.0316600000000022 | F | F | F |
| 0.4004100000000008 | 0.5834199999999967  | 0.0055800000000019 | F | F | F |
| 0.9414999999999978 | 0.6335800000000020  | 0.0540700000000029 | F | F | F |
| 0.7286358621645714 | 0.5249627212154252  | 0.2247000533209170 | T | T | T |
| 0.9763440629378942 | 0.7339389733144378  | 0.1594165027586038 | T | T | T |
| 0.6822900000000018 | 0.9438999999999993  | 0.1272599999999997 | F | F | F |
| 0.2237836170648278 | -0.0116009093303173 | 0.1887694472343969 | T | T | T |
| 0.0415899999999993 | 0.4791999999999987  | 0.0186199999999985 | F | F | F |
| 0.8082599999999971 | 0.2894099999999966  | 0.0926499999999990 | F | F | F |
| 0.0526100000000014 | 0.0659599999999969  | 0.1194199999999981 | F | F | F |
| 0.3098299999999981 | 0.2528199999999998  | 0.0428100000000029 | F | F | F |
| 0.5541800000000023 | 0.0293700000000001  | 0.0695800000000020 | F | F | F |
| 0.3302699999999987 | 0.3409100000000009  | 0.1444499999999991 | F | F | F |
| 0.0692322165270905 | 0.1433226309706105  | 0.2146463218658675 | T | T | T |
| 0.3828306477839895 | 0.4599040041136542  | 0.2447072049028186 | T | T | T |
| 0.5893083334774406 | 0.1075531477887974  | 0.1699294871517106 | T | T | T |
| 0.8476634645921665 | 0.3840655320816060  | 0.1936500490184533 | T | T | T |
| 0.0415899999999993 | 0.9791999999999987  | 0.0186199999999985 | F | F | F |
| 0.8082599999999971 | 0.7894099999999966  | 0.0926499999999990 | F | F | F |
| 0.0526100000000014 | 0.5659599999999969  | 0.1194199999999981 | F | F | F |
| 0.3098299999999981 | 0.7528199999999998  | 0.0428100000000029 | F | F | F |
| 0.5541800000000023 | 0.5293700000000001  | 0.0695800000000020 | F | F | F |
| 0.3295000000000030 | 0.8411499999999990  | 0.1446200000000033 | F | F | F |

|                    |                    |                    |   |   |   |
|--------------------|--------------------|--------------------|---|---|---|
| 0.0587658032467092 | 0.6444851159392119 | 0.2160546502980324 | T | T | T |
| 0.4094044989192641 | 0.9631696383655798 | 0.2520056475016315 | T | T | T |
| 0.5927095225688533 | 0.6083302408717055 | 0.1697823831113524 | T | T | T |
| 0.8384316835202628 | 0.8855527170835542 | 0.1910002913537962 | T | T | T |
| 0.1608889434704381 | 0.9216633196600977 | 0.2587846405294500 | T | T | T |

Ta<sub>4</sub>N<sub>5</sub> (100) + \*OH

Ta N O H

|                     |                     |                     |  |
|---------------------|---------------------|---------------------|--|
| 1.0000000000000000  |                     |                     |  |
| 5.3044300000000000  | 0.0000000000000000  | 0.0000000000000000  |  |
| -1.7217108756555533 | 10.4682601644518467 | 0.0000000000000000  |  |
| 0.0000000000000000  | 0.0000000000000000  | 29.0263999999999989 |  |

Ta N O H

16 20 1 1

Selective dynamics

Direct

|                    |                    |                    |   |   |   |
|--------------------|--------------------|--------------------|---|---|---|
| 0.4209499999999977 | 0.1852000000000018 | 0.1081599999999980 | F | F | F |
| 0.6827699999999979 | 0.3749899999999968 | 0.0316600000000022 | F | F | F |
| 0.4004100000000008 | 0.0834199999999967 | 0.0055800000000019 | F | F | F |
| 0.9414999999999978 | 0.1335800000000020 | 0.0540700000000029 | F | F | F |
| 0.7228727967865344 | 0.0266212044199915 | 0.2235910132607347 | T | T | T |
| 0.9747088588102408 | 0.2333585095038778 | 0.1597210875117201 | T | T | T |
| 0.6867299999999972 | 0.4461799999999982 | 0.1268699999999967 | F | F | F |
| 0.2280668702357874 | 0.4889614211875451 | 0.1876535543136729 | T | T | T |
| 0.4209499999999977 | 0.6852000000000018 | 0.1081599999999980 | F | F | F |
| 0.6827699999999979 | 0.8749899999999968 | 0.0316600000000022 | F | F | F |
| 0.4004100000000008 | 0.5834199999999967 | 0.0055800000000019 | F | F | F |
| 0.9414999999999978 | 0.6335800000000020 | 0.0540700000000029 | F | F | F |
| 0.7296139963363943 | 0.5258707834587811 | 0.2247781726167916 | T | T | T |
| 0.9795023167222445 | 0.7347102069035228 | 0.1599575053670257 | T | T | T |
| 0.6822900000000018 | 0.9438999999999993 | 0.1272599999999997 | F | F | F |
| 0.2285671107882138 | 0.9969244713344108 | 0.1828651706627503 | T | T | T |
| 0.0415899999999993 | 0.4791999999999987 | 0.0186199999999985 | F | F | F |
| 0.8082599999999971 | 0.2894099999999966 | 0.0926499999999990 | F | F | F |
| 0.0526100000000014 | 0.0659599999999969 | 0.1194199999999981 | F | F | F |
| 0.3098299999999981 | 0.2528199999999998 | 0.0428100000000029 | F | F | F |
| 0.5541800000000023 | 0.0293700000000001 | 0.0695800000000020 | F | F | F |
| 0.3302699999999987 | 0.3409100000000009 | 0.1444499999999991 | F | F | F |
| 0.0566704154009080 | 0.1425822344184972 | 0.2171089676748752 | T | T | T |
| 0.3840188269301243 | 0.4599165090383492 | 0.2448889076594891 | T | T | T |
| 0.5976064401644422 | 0.1119853955503713 | 0.1687461529517850 | T | T | T |
| 0.8468473477914016 | 0.3848830647191715 | 0.1937919674651885 | T | T | T |

|                    |                    |                    |   |   |   |
|--------------------|--------------------|--------------------|---|---|---|
| 0.0415899999999993 | 0.9791999999999987 | 0.0186199999999985 | F | F | F |
| 0.8082599999999971 | 0.7894099999999966 | 0.0926499999999990 | F | F | F |
| 0.0526100000000014 | 0.5659599999999969 | 0.1194199999999981 | F | F | F |
| 0.3098299999999981 | 0.7528199999999998 | 0.0428100000000029 | F | F | F |
| 0.5541800000000023 | 0.5293700000000001 | 0.0695800000000020 | F | F | F |
| 0.3295000000000030 | 0.8411499999999990 | 0.1446200000000033 | F | F | F |
| 0.0608292600515972 | 0.6451444681747660 | 0.2165425065415855 | T | T | T |
| 0.3701276235157901 | 0.9705157336810309 | 0.2490830811757276 | T | T | T |
| 0.5943400772055381 | 0.6082240995307889 | 0.1698599845018724 | T | T | T |
| 0.8462033283956404 | 0.8852308002296735 | 0.1930551463585802 | T | T | T |
| 0.1888822037141047 | 0.9564095029139497 | 0.2862968520258027 | T | T | T |
| 0.2669174343854281 | 0.0150740236798149 | 0.3102129949893568 | T | T | T |

Ni<sub>3</sub>N (110) - Surface

Ni N

|                    |                    |                     |  |  |  |
|--------------------|--------------------|---------------------|--|--|--|
| 1.0000000000000000 |                    |                     |  |  |  |
| 4.3013100000000000 | 0.0000000000000000 | 0.0000000000000000  |  |  |  |
| 0.0000000000000000 | 7.9770300000000001 | 0.0000000000000000  |  |  |  |
| 0.0000000000000000 | 0.0000000000000000 | 27.6332999999999984 |  |  |  |

Ni N

24 8

Selective dynamics

Direct

|                     |                    |                    |   |   |   |
|---------------------|--------------------|--------------------|---|---|---|
| 0.5000000000000000  | 0.1645299999999992 | 0.0131799999999984 | F | F | F |
| 0.5000000000000000  | 0.6645299999999992 | 0.0965100000000021 | F | F | F |
| 0.0000000000000000  | 0.3354700000000008 | 0.0416700000000034 | F | F | F |
| 0.0000000000000000  | 0.8354700000000008 | 0.1250000000000000 | F | F | F |
| 0.0000000000000000  | 0.5000000000000000 | 0.1239300000000014 | F | F | F |
| 0.0000000000000000  | 0.0000000000000000 | 0.0405999999999977 | F | F | F |
| 0.5000000000000000  | 0.8354700000000008 | 0.0131799999999984 | F | F | F |
| 0.5000000000000000  | 0.3354700000000008 | 0.0965100000000021 | F | F | F |
| 0.5000000000000000  | 0.5000000000000000 | 0.0142400000000009 | F | F | F |
| 0.5000000000000000  | 0.0000000000000000 | 0.0975800000000007 | F | F | F |
| 0.0000000000000000  | 0.6645299999999992 | 0.0416700000000034 | F | F | F |
| 0.0000000000000000  | 0.1645299999999992 | 0.1250000000000000 | F | F | F |
| 0.4949581033046698  | 0.1669037208550333 | 0.1794712455889469 | T | T | T |
| 0.5008518786571907  | 0.6642596644618823 | 0.2678170817950116 | T | T | T |
| -0.0011174313860081 | 0.3349892439444008 | 0.2082360672591807 | T | T | T |
| 0.0108172445599954  | 0.8333265797814742 | 0.2905431617782624 | T | T | T |
| 0.0000320403536215  | 0.5002131663218148 | 0.2928231891180743 | T | T | T |
| -0.0000276776375876 | 0.0000805893032433 | 0.2079867789464517 | T | T | T |
| 0.5049704638989332  | 0.8331270844322879 | 0.1794778792543936 | T | T | T |

|                    |                    |                    |   |   |   |
|--------------------|--------------------|--------------------|---|---|---|
| 0.4990066708352540 | 0.3361014883835530 | 0.2677909916262879 | T | T | T |
| 0.5000069162170692 | 0.5000136820083662 | 0.1815739450215116 | T | T | T |
| 0.5000804353788646 | 0.0001567489332731 | 0.2615986077677800 | T | T | T |
| 0.0009961339056021 | 0.6651106920638551 | 0.2082388116210723 | T | T | T |
| 0.9891839966153283 | 0.1671117660737502 | 0.2905500524374454 | T | T | T |
| 0.2500000000000000 | 0.6666700000000034 | 0.1524199999999993 | F | F | F |
| 0.2500000000000000 | 0.1666700000000034 | 0.0690900000000028 | F | F | F |
| 0.7500000000000000 | 0.3333299999999966 | 0.1524199999999993 | F | F | F |
| 0.7500000000000000 | 0.8333299999999966 | 0.0690900000000028 | F | F | F |
| 0.2250227813101537 | 0.6690520002751982 | 0.3154058777102137 | T | T | T |
| 0.2529483209374063 | 0.1688653218665754 | 0.2370155893254735 | T | T | T |
| 0.7748456788886844 | 0.3313833855943143 | 0.3153710816052658 | T | T | T |
| 0.7469977318707240 | 0.8313242084111646 | 0.2370152294413743 | T | T | T |

Ni<sub>3</sub>N (110) + \*OOH

Ni N O H

|                    |                    |                     |  |
|--------------------|--------------------|---------------------|--|
| 1.0000000000000000 |                    |                     |  |
| 4.3013100000000000 | 0.0000000000000000 | 0.0000000000000000  |  |
| 0.0000000000000000 | 7.9770300000000001 | 0.0000000000000000  |  |
| 0.0000000000000000 | 0.0000000000000000 | 27.6332999999999984 |  |

Ni N O H  
24 8 2 1

Selective dynamics

Direct

|                     |                     |                    |   |   |   |
|---------------------|---------------------|--------------------|---|---|---|
| 0.5000000000000000  | 0.1645299999999992  | 0.0131799999999984 | F | F | F |
| 0.5000000000000000  | 0.6645299999999992  | 0.0965100000000021 | F | F | F |
| 0.0000000000000000  | 0.3354700000000008  | 0.0416700000000034 | F | F | F |
| 0.0000000000000000  | 0.8354700000000008  | 0.1250000000000000 | F | F | F |
| 0.0000000000000000  | 0.5000000000000000  | 0.1239300000000014 | F | F | F |
| 0.0000000000000000  | 0.0000000000000000  | 0.0405999999999977 | F | F | F |
| 0.5000000000000000  | 0.8354700000000008  | 0.0131799999999984 | F | F | F |
| 0.5000000000000000  | 0.3354700000000008  | 0.0965100000000021 | F | F | F |
| 0.5000000000000000  | 0.5000000000000000  | 0.0142400000000009 | F | F | F |
| 0.5000000000000000  | 0.0000000000000000  | 0.0975800000000007 | F | F | F |
| 0.0000000000000000  | 0.6645299999999992  | 0.0416700000000034 | F | F | F |
| 0.0000000000000000  | 0.1645299999999992  | 0.1250000000000000 | F | F | F |
| 0.4944496787496243  | 0.1681407127667426  | 0.1830662895641180 | T | T | T |
| 0.5128762839536036  | 0.6542174673252678  | 0.2582427276250117 | T | T | T |
| -0.0138702358353434 | 0.3318678066905447  | 0.2080754432016668 | T | T | T |
| -0.0038414320245991 | 0.7332272388789270  | 0.2953075404494352 | T | T | T |
| -0.0706834573295554 | 0.4479674433884334  | 0.3279404908948116 | T | T | T |
| -0.0034234863308174 | -0.0006931123917513 | 0.2106997875230535 | T | T | T |



|                    |                     |                    |   |   |   |
|--------------------|---------------------|--------------------|---|---|---|
| 0.5045016881045301 | 0.8366098086054943  | 0.1800356977470821 | T | T | T |
| 0.4104459136714761 | 0.3594500153002616  | 0.2682442534414846 | T | T | T |
| 0.4950929249550052 | 0.4976392699795344  | 0.1801130895693604 | T | T | T |
| 0.4970915466054722 | -0.0069507035235969 | 0.2628631234063192 | T | T | T |
| 0.0023782030139770 | 0.6728662027797404  | 0.2063906625463206 | T | T | T |
| 0.9422218825845845 | 0.1774032386579032  | 0.2909044821137934 | T | T | T |
| 0.2500000000000000 | 0.6666700000000034  | 0.1524199999999993 | F | F | F |
| 0.2500000000000000 | 0.1666700000000034  | 0.0690900000000028 | F | F | F |
| 0.7500000000000000 | 0.3333299999999966  | 0.1524199999999993 | F | F | F |
| 0.7500000000000000 | 0.8333299999999966  | 0.0690900000000028 | F | F | F |
| 0.2706602630107320 | 0.5476123243711266  | 0.2987366620190988 | T | T | T |
| 0.2407944127457863 | 0.1654603620399534  | 0.2406983161380738 | T | T | T |
| 0.8228014076499504 | 0.2436282290959134  | 0.3494796928329469 | T | T | T |
| 0.7672825209222609 | 0.8309005266909258  | 0.2412179083873212 | T | T | T |
| 0.7632920876568494 | 0.1872596776674591  | 0.3888237720415048 | T | T | T |
| 0.8599473718673564 | 0.6605152251262667  | 0.3604931394666552 | T | T | T |
| 0.6398126144826796 | 0.6838045294864898  | 0.3660485313582565 | T | T | T |

Ni<sub>3</sub>N (110) + \*O

Ni N O

|                    |                    |                     |
|--------------------|--------------------|---------------------|
| 1.0000000000000000 |                    |                     |
| 4.3013100000000000 | 0.0000000000000000 | 0.0000000000000000  |
| 0.0000000000000000 | 7.9770300000000001 | 0.0000000000000000  |
| 0.0000000000000000 | 0.0000000000000000 | 27.6332999999999984 |

Ni N O

24 8 1

Selective dynamics

Direct

|                    |                    |                    |   |   |   |
|--------------------|--------------------|--------------------|---|---|---|
| 0.5000000000000000 | 0.1645299999999992 | 0.0131799999999984 | F | F | F |
| 0.5000000000000000 | 0.6645299999999992 | 0.0965100000000021 | F | F | F |
| 0.0000000000000000 | 0.3354700000000008 | 0.0416700000000034 | F | F | F |
| 0.0000000000000000 | 0.8354700000000008 | 0.1250000000000000 | F | F | F |
| 0.0000000000000000 | 0.5000000000000000 | 0.1239300000000014 | F | F | F |
| 0.0000000000000000 | 0.0000000000000000 | 0.0405999999999977 | F | F | F |
| 0.5000000000000000 | 0.8354700000000008 | 0.0131799999999984 | F | F | F |
| 0.5000000000000000 | 0.3354700000000008 | 0.0965100000000021 | F | F | F |
| 0.5000000000000000 | 0.5000000000000000 | 0.0142400000000009 | F | F | F |
| 0.5000000000000000 | 0.0000000000000000 | 0.0975800000000007 | F | F | F |
| 0.0000000000000000 | 0.6645299999999992 | 0.0416700000000034 | F | F | F |
| 0.0000000000000000 | 0.1645299999999992 | 0.1250000000000000 | F | F | F |
| 0.4967841730553349 | 0.1664247347814460 | 0.1797893614758180 | T | T | T |
| 0.5020199775208110 | 0.6621162442222508 | 0.2669464307999522 | T | T | T |

|                     |                     |                    |   |   |   |
|---------------------|---------------------|--------------------|---|---|---|
| 0.0055608067600788  | 0.3389827090679488  | 0.2076573366250550 | T | T | T |
| 0.0045949946162819  | 0.8276285955697215  | 0.2905874561149457 | T | T | T |
| -0.0066879283587954 | 0.4960205305327599  | 0.2913497475770457 | T | T | T |
| -0.0008393288213491 | 0.0021547391256829  | 0.2083609096358461 | T | T | T |
| 0.5031098806434142  | 0.8342474158475872  | 0.1793081761079868 | T | T | T |
| 0.4968955348281463  | 0.3377896863550899  | 0.2682897234124147 | T | T | T |
| 0.5022416051556379  | 0.5006887787839054  | 0.1815166113467969 | T | T | T |
| 0.4936427239580387  | -0.0010034425109397 | 0.2614687355142613 | T | T | T |
| -0.0005811729541324 | 0.6663214270076623  | 0.2079204895306598 | T | T | T |
| 0.9733007787080673  | 0.1670393765775151  | 0.2886345158660032 | T | T | T |
| 0.2500000000000000  | 0.6666700000000034  | 0.1524199999999993 | F | F | F |
| 0.2500000000000000  | 0.1666700000000034  | 0.0690900000000028 | F | F | F |
| 0.7500000000000000  | 0.3333299999999966  | 0.1524199999999993 | F | F | F |
| 0.7500000000000000  | 0.8333299999999966  | 0.0690900000000028 | F | F | F |
| 0.2229894173886493  | 0.6613446305891424  | 0.3136718278527275 | T | T | T |
| 0.2553619626295709  | 0.1714106100021401  | 0.2370983488090063 | T | T | T |
| 0.7579755012616439  | 0.3287875326955583  | 0.3231340374342235 | T | T | T |
| 0.7447882204991546  | 0.8326093633710704  | 0.2368142454203432 | T | T | T |
| 0.6942781204168860  | 0.3253555725789896  | 0.3662696002664164 | T | T | T |

Ni<sub>3</sub>N (110) + \*OH

Ni N O H

|                    |                    |                     |  |
|--------------------|--------------------|---------------------|--|
| 1.0000000000000000 |                    |                     |  |
| 4.3013100000000000 | 0.0000000000000000 | 0.0000000000000000  |  |
| 0.0000000000000000 | 7.9770300000000001 | 0.0000000000000000  |  |
| 0.0000000000000000 | 0.0000000000000000 | 27.6332999999999984 |  |

Ni N O H

24 8 1 1

Selective dynamics

Direct

|                    |                    |                    |   |   |   |
|--------------------|--------------------|--------------------|---|---|---|
| 0.5000000000000000 | 0.1645299999999992 | 0.0131799999999984 | F | F | F |
| 0.5000000000000000 | 0.6645299999999992 | 0.0965100000000021 | F | F | F |
| 0.0000000000000000 | 0.3354700000000008 | 0.0416700000000034 | F | F | F |
| 0.0000000000000000 | 0.8354700000000008 | 0.1250000000000000 | F | F | F |
| 0.0000000000000000 | 0.5000000000000000 | 0.1239300000000014 | F | F | F |
| 0.0000000000000000 | 0.0000000000000000 | 0.0405999999999977 | F | F | F |
| 0.5000000000000000 | 0.8354700000000008 | 0.0131799999999984 | F | F | F |
| 0.5000000000000000 | 0.3354700000000008 | 0.0965100000000021 | F | F | F |
| 0.5000000000000000 | 0.5000000000000000 | 0.0142400000000009 | F | F | F |
| 0.5000000000000000 | 0.0000000000000000 | 0.0975800000000007 | F | F | F |
| 0.0000000000000000 | 0.6645299999999992 | 0.0416700000000034 | F | F | F |
| 0.0000000000000000 | 0.1645299999999992 | 0.1250000000000000 | F | F | F |

|                     |                     |                    |   |   |   |
|---------------------|---------------------|--------------------|---|---|---|
| 0.4970674553105374  | 0.1660466457497265  | 0.1796647292498076 | T | T | T |
| 0.5041999496548309  | 0.6618823700035665  | 0.2668360071375372 | T | T | T |
| 0.0033450593383000  | 0.3374410416536085  | 0.2074721078083312 | T | T | T |
| 0.0170898561402399  | 0.8257550763845281  | 0.2906175080977287 | T | T | T |
| -0.0120212378685542 | 0.4984529966407362  | 0.2918151092461917 | T | T | T |
| 0.0008111055290539  | -0.0005070845560223 | 0.2080784450910911 | T | T | T |
| 0.5050302678489786  | 0.8335908056469167  | 0.1797183874753255 | T | T | T |
| 0.4926652392156411  | 0.3350616909085654  | 0.2666362863495446 | T | T | T |
| 0.5008668009895890  | 0.5000560920363817  | 0.1815039434003253 | T | T | T |
| 0.5006635321442863  | 0.9993848895396387  | 0.2624590622694922 | T | T | T |
| 0.0010224806915443  | 0.6655064602947499  | 0.2080678877098923 | T | T | T |
| 0.9818989535137645  | 0.1738763560941420  | 0.2886332402806384 | T | T | T |
| 0.2500000000000000  | 0.6666700000000034  | 0.1524199999999993 | F | F | F |
| 0.2500000000000000  | 0.1666700000000034  | 0.0690900000000028 | F | F | F |
| 0.7500000000000000  | 0.3333299999999966  | 0.1524199999999993 | F | F | F |
| 0.7500000000000000  | 0.8333299999999966  | 0.0690900000000028 | F | F | F |
| 0.2310695146243567  | 0.6571947983522498  | 0.3150517911913603 | T | T | T |
| 0.2528930998296718  | 0.1669265564659271  | 0.2369285177972808 | T | T | T |
| 0.7508121061085316  | 0.3287902774310421  | 0.3204309932920187 | T | T | T |
| 0.7479585999371791  | 0.8324884647384108  | 0.2374668145735158 | T | T | T |
| 0.6364092520253152  | 0.3486313096461785  | 0.3669410917094529 | T | T | T |
| 0.5020193285928383  | 0.4494263874814571  | 0.3655416889381694 | T | T | T |

### Fe<sub>3</sub>N (110) - Surface

Fe N

|                    |                    |                     |
|--------------------|--------------------|---------------------|
| 1.0000000000000000 |                    |                     |
| 4.3045799999999996 | 0.0000000000000000 | 0.0000000000000000  |
| 0.0000000000000000 | 8.0405899999999999 | 0.0000000000000000  |
| 0.0000000000000000 | 0.0000000000000000 | 27.8534000000000006 |

Fe N

24 8

Selective dynamics

Direct

|                    |                    |                    |   |   |   |
|--------------------|--------------------|--------------------|---|---|---|
| 0.0000000000000000 | 0.5000000000000000 | 0.1230499999999992 | F | F | F |
| 0.0000000000000000 | 0.0000000000000000 | 0.0397200000000026 | F | F | F |
| 0.5000000000000000 | 0.1627799999999979 | 0.0125900000000030 | F | F | F |
| 0.5000000000000000 | 0.6627799999999979 | 0.0959300000000027 | F | F | F |
| 0.5000000000000000 | 0.8372200000000021 | 0.0125900000000030 | F | F | F |
| 0.5000000000000000 | 0.3372200000000021 | 0.0959300000000027 | F | F | F |
| 0.5000000000000000 | 0.5000000000000000 | 0.0145399999999967 | F | F | F |
| 0.5000000000000000 | 0.0000000000000000 | 0.0978700000000003 | F | F | F |
| 0.0000000000000000 | 0.3372200000000021 | 0.0416700000000034 | F | F | F |

|                     |                     |                    |   |   |   |
|---------------------|---------------------|--------------------|---|---|---|
| 0.0000000000000000  | 0.8372200000000021  | 0.1250000000000000 | F | F | F |
| 0.0000000000000000  | 0.6627799999999979  | 0.0416700000000034 | F | F | F |
| 0.0000000000000000  | 0.1627799999999979  | 0.1250000000000000 | F | F | F |
| -0.0000000000000000 | 0.5000000000000000  | 0.2888700051602655 | T | T | T |
| -0.0000000000000000 | -0.0000000000000000 | 0.2054802011728181 | T | T | T |
| 0.5017981428864230  | 0.1656938597716576  | 0.1796844272498765 | T | T | T |
| 0.4979847119877185  | 0.6576511147146733  | 0.2651037550722578 | T | T | T |
| 0.4982018571135769  | 0.8343061402283426  | 0.1796844272498765 | T | T | T |
| 0.5020152880122816  | 0.3423488852853264  | 0.2651037550722578 | T | T | T |
| 0.5000000000000000  | 0.5000000000000000  | 0.1817955607652538 | T | T | T |
| 0.5000000000000000  | -0.0000000000000000 | 0.2608845067861496 | T | T | T |
| 0.9990186788837607  | 0.3385305543598645  | 0.2082733088140492 | T | T | T |
| 0.9690494853425677  | 0.8301181593844832  | 0.2879324063180843 | T | T | T |
| 0.0009813211162392  | 0.6614694456401354  | 0.2082733088140492 | T | T | T |
| 0.0309505146574322  | 0.1698818406155169  | 0.2879324063180843 | T | T | T |
| 0.7500000000000000  | 0.6666700000000034  | 0.1521299999999997 | F | F | F |
| 0.7500000000000000  | 0.1666700000000034  | 0.0688000000000031 | F | F | F |
| 0.2500000000000000  | 0.3333299999999966  | 0.1521299999999997 | F | F | F |
| 0.2500000000000000  | 0.8333299999999966  | 0.0688000000000031 | F | F | F |
| 0.7698257811552646  | 0.6593372727642154  | 0.3148967478842637 | T | T | T |
| 0.7486963744355218  | 0.1698862295228002  | 0.2370542477666007 | T | T | T |
| 0.2301742188447359  | 0.3406627272357846  | 0.3148967478842637 | T | T | T |
| 0.2513036255644785  | 0.8301137704771997  | 0.2370542477666007 | T | T | T |

Fe<sub>3</sub>N (110) + \*OOH

Fe N O H

|                    |                    |                     |  |
|--------------------|--------------------|---------------------|--|
| 1.0000000000000000 |                    |                     |  |
| 4.3045799999999996 | 0.0000000000000000 | 0.0000000000000000  |  |
| 0.0000000000000000 | 8.0405899999999999 | 0.0000000000000000  |  |
| 0.0000000000000000 | 0.0000000000000000 | 27.8534000000000006 |  |

Fe N O H

24 8 2 1

Selective dynamics

Direct

|                    |                    |                    |   |   |   |
|--------------------|--------------------|--------------------|---|---|---|
| 0.0000000000000000 | 0.5000000000000000 | 0.1230499999999992 | F | F | F |
| 0.0000000000000000 | 0.0000000000000000 | 0.0397200000000026 | F | F | F |
| 0.5000000000000000 | 0.1627799999999979 | 0.0125900000000030 | F | F | F |
| 0.5000000000000000 | 0.6627799999999979 | 0.0959300000000027 | F | F | F |
| 0.5000000000000000 | 0.8372200000000021 | 0.0125900000000030 | F | F | F |
| 0.5000000000000000 | 0.3372200000000021 | 0.0959300000000027 | F | F | F |
| 0.5000000000000000 | 0.5000000000000000 | 0.0145399999999967 | F | F | F |
| 0.5000000000000000 | 0.0000000000000000 | 0.0978700000000003 | F | F | F |

|                     |                    |                    |   |   |   |
|---------------------|--------------------|--------------------|---|---|---|
| 0.0000000000000000  | 0.3372200000000021 | 0.0416700000000034 | F | F | F |
| 0.0000000000000000  | 0.8372200000000021 | 0.1250000000000000 | F | F | F |
| 0.0000000000000000  | 0.6627799999999979 | 0.0416700000000034 | F | F | F |
| 0.0000000000000000  | 0.1627799999999979 | 0.1250000000000000 | F | F | F |
| 0.9920297175164713  | 0.5041074968527681 | 0.2891064356886706 | T | T | T |
| -0.0002392901227993 | 0.0008144743395470 | 0.2068465305256881 | T | T | T |
| 0.5054192428287602  | 0.1665113798216589 | 0.1794194201360668 | T | T | T |
| 0.5105821786500664  | 0.6651478828100837 | 0.2644220196042599 | T | T | T |
| 0.4964529046897394  | 0.8361142841282865 | 0.1791009777606656 | T | T | T |
| 0.5001913227744806  | 0.3453325530664225 | 0.2638179992720211 | T | T | T |
| 0.5000834530272454  | 0.5004311788307315 | 0.1809040228322491 | T | T | T |
| 0.4971048377019033  | 0.0015186711928710 | 0.2579833363456065 | T | T | T |
| 0.0037197857845217  | 0.3352581443252173 | 0.2080742258396094 | T | T | T |
| 0.9812486516778109  | 0.8302717024040155 | 0.2909303754081328 | T | T | T |
| 0.0016497192778134  | 0.6605637460693834 | 0.2083511852509863 | T | T | T |
| 0.0182114679304945  | 0.1775901987686708 | 0.2935726546214621 | T | T | T |
| 0.7500000000000000  | 0.6666700000000034 | 0.1521299999999997 | F | F | F |
| 0.7500000000000000  | 0.1666700000000034 | 0.0688000000000031 | F | F | F |
| 0.2500000000000000  | 0.3333299999999966 | 0.1521299999999997 | F | F | F |
| 0.2500000000000000  | 0.8333299999999966 | 0.0688000000000031 | F | F | F |
| 0.7556378712624656  | 0.6618944217485369 | 0.3233349674699053 | T | T | T |
| 0.7538351599259078  | 0.1728897118296409 | 0.2375330884990046 | T | T | T |
| 0.2412659130552020  | 0.3547658531498049 | 0.3141251278669030 | T | T | T |
| 0.2454690842451081  | 0.8288540767187564 | 0.2363668886907181 | T | T | T |
| 0.6752946786432340  | 0.6579656554447872 | 0.3659707857286045 | T | T | T |
| -0.0052138728345394 | 0.9969253600522768 | 0.3413950212800085 | T | T | T |
| 0.8361525818181434  | 0.9931942517264338 | 0.3663963150145674 | T | T | T |

Fe<sub>3</sub>N (110) + \*O

Fe N O

|                    |                    |                     |
|--------------------|--------------------|---------------------|
| 1.0000000000000000 |                    |                     |
| 4.3045799999999996 | 0.0000000000000000 | 0.0000000000000000  |
| 0.0000000000000000 | 8.0405899999999999 | 0.0000000000000000  |
| 0.0000000000000000 | 0.0000000000000000 | 27.8534000000000006 |

Fe N O

24 8 1

Selective dynamics

Direct

|                    |                    |                    |   |   |   |
|--------------------|--------------------|--------------------|---|---|---|
| 0.0000000000000000 | 0.5000000000000000 | 0.1230499999999992 | F | F | F |
| 0.0000000000000000 | 0.0000000000000000 | 0.0397200000000026 | F | F | F |
| 0.5000000000000000 | 0.1627799999999979 | 0.0125900000000030 | F | F | F |
| 0.5000000000000000 | 0.6627799999999979 | 0.0959300000000027 | F | F | F |

|                     |                     |                    |   |   |   |
|---------------------|---------------------|--------------------|---|---|---|
| 0.5000000000000000  | 0.8372200000000021  | 0.0125900000000030 | F | F | F |
| 0.5000000000000000  | 0.3372200000000021  | 0.0959300000000027 | F | F | F |
| 0.5000000000000000  | 0.5000000000000000  | 0.0145399999999967 | F | F | F |
| 0.5000000000000000  | 0.0000000000000000  | 0.0978700000000003 | F | F | F |
| 0.0000000000000000  | 0.3372200000000021  | 0.0416700000000034 | F | F | F |
| 0.0000000000000000  | 0.8372200000000021  | 0.1250000000000000 | F | F | F |
| 0.0000000000000000  | 0.6627799999999979  | 0.0416700000000034 | F | F | F |
| 0.0000000000000000  | 0.1627799999999979  | 0.1250000000000000 | F | F | F |
| 0.9910104759442934  | 0.5009752623201175  | 0.2905570989701497 | T | T | T |
| 0.9957557985432346  | -0.0021969297153067 | 0.2055219288031717 | T | T | T |
| 0.5003124335431792  | 0.1648151438645509  | 0.1795013372598486 | T | T | T |
| 0.5017795899075560  | 0.6593660483759045  | 0.2646074197656237 | T | T | T |
| 0.4981676420924903  | 0.8348641670130771  | 0.1798810906073936 | T | T | T |
| 0.5000827515833334  | 0.3454847283499666  | 0.2642240333686457 | T | T | T |
| 0.4993950817722166  | 0.5000272072795997  | 0.1809639642629444 | T | T | T |
| 0.4938648805671084  | 0.0005645403706548  | 0.2606654818331283 | T | T | T |
| -0.0008856673883322 | 0.3370658375615393  | 0.2079701328247942 | T | T | T |
| 0.9613072308103360  | 0.8326599063547341  | 0.2879729539275468 | T | T | T |
| 0.0020168995516820  | 0.6578999779377079  | 0.2085552446770985 | T | T | T |
| 0.0246523274518884  | 0.1707257058736150  | 0.2875968133129626 | T | T | T |
| 0.7500000000000000  | 0.6666700000000034  | 0.1521299999999997 | F | F | F |
| 0.7500000000000000  | 0.1666700000000034  | 0.0688000000000031 | F | F | F |
| 0.2500000000000000  | 0.3333299999999966  | 0.1521299999999997 | F | F | F |
| 0.2500000000000000  | 0.8333299999999966  | 0.0688000000000031 | F | F | F |
| 0.7532466160380622  | 0.6639339997509986  | 0.3226669340680450 | T | T | T |
| 0.7440616276190537  | 0.1700522772174456  | 0.2369647011966250 | T | T | T |
| 0.2311411772824479  | 0.3405085483921425  | 0.3136045264842600 | T | T | T |
| 0.2482103673467397  | 0.8295086547105378  | 0.2366967971703769 | T | T | T |
| 0.6851948507312831  | 0.6690753582015539  | 0.3658263047475626 | T | T | T |

Fe<sub>3</sub>N (110) + \*OH

Fe N O H

|                    |                    |                     |
|--------------------|--------------------|---------------------|
| 1.0000000000000000 |                    |                     |
| 4.3045799999999996 | 0.0000000000000000 | 0.0000000000000000  |
| 0.0000000000000000 | 8.0405899999999999 | 0.0000000000000000  |
| 0.0000000000000000 | 0.0000000000000000 | 27.8534000000000006 |

Fe N O H

24 8 1 1

Selective dynamics

Direct

|                    |                    |                    |   |   |   |
|--------------------|--------------------|--------------------|---|---|---|
| 0.0000000000000000 | 0.5000000000000000 | 0.1230499999999992 | F | F | F |
| 0.0000000000000000 | 0.0000000000000000 | 0.0397200000000026 | F | F | F |

|                    |                     |                    |   |   |   |
|--------------------|---------------------|--------------------|---|---|---|
| 0.5000000000000000 | 0.1627799999999979  | 0.0125900000000030 | F | F | F |
| 0.5000000000000000 | 0.6627799999999979  | 0.0959300000000027 | F | F | F |
| 0.5000000000000000 | 0.8372200000000021  | 0.0125900000000030 | F | F | F |
| 0.5000000000000000 | 0.3372200000000021  | 0.0959300000000027 | F | F | F |
| 0.5000000000000000 | 0.5000000000000000  | 0.0145399999999967 | F | F | F |
| 0.5000000000000000 | 0.0000000000000000  | 0.0978700000000003 | F | F | F |
| 0.0000000000000000 | 0.3372200000000021  | 0.0416700000000034 | F | F | F |
| 0.0000000000000000 | 0.8372200000000021  | 0.1250000000000000 | F | F | F |
| 0.0000000000000000 | 0.6627799999999979  | 0.0416700000000034 | F | F | F |
| 0.0000000000000000 | 0.1627799999999979  | 0.1250000000000000 | F | F | F |
| 0.9910642722171278 | 0.4996243899146987  | 0.2889693372666465 | T | T | T |
| 0.9962340041824606 | -0.0006635512430308 | 0.2059071375547173 | T | T | T |
| 0.5013711935062998 | 0.1650858522577551  | 0.1799182131051630 | T | T | T |
| 0.4988446180625848 | 0.6627246490991314  | 0.2636368978795999 | T | T | T |
| 0.4993287411969620 | 0.8353157344062029  | 0.1800936224569287 | T | T | T |
| 0.5035147674011473 | 0.3465446441356131  | 0.2637589429815653 | T | T | T |
| 0.4983089451350167 | 0.5005558540449838  | 0.1811447578298147 | T | T | T |
| 0.4965808677085045 | 0.0015352544392074  | 0.2616681048786691 | T | T | T |
| 0.9986283806512525 | 0.3366762837720992  | 0.2077721522773059 | T | T | T |
| 0.9668315380860861 | 0.8267842652106088  | 0.2892679467076404 | T | T | T |
| 0.0033502565255853 | 0.6593443375196699  | 0.2081388663736012 | T | T | T |
| 0.0337275070792764 | 0.1748479501723454  | 0.2879738919248128 | T | T | T |
| 0.7500000000000000 | 0.6666700000000034  | 0.1521299999999997 | F | F | F |
| 0.7500000000000000 | 0.1666700000000034  | 0.0688000000000031 | F | F | F |
| 0.2500000000000000 | 0.3333299999999966  | 0.1521299999999997 | F | F | F |
| 0.2500000000000000 | 0.8333299999999966  | 0.0688000000000031 | F | F | F |
| 0.7407592206252162 | 0.6573201575646772  | 0.3194952509456399 | T | T | T |
| 0.7470810491715437 | 0.1700885341732919  | 0.2376620795176407 | T | T | T |
| 0.2400013758789704 | 0.3478052389596273  | 0.3145164314495588 | T | T | T |
| 0.2482476994845020 | 0.8319268688694104  | 0.2371234290285943 | T | T | T |
| 0.6311715063815372 | 0.6327194872006145  | 0.3662469297130871 | T | T | T |
| 0.4918567463423095 | 0.5350512477631689  | 0.3634849910451782 | T | T | T |

Cr<sub>3</sub>N<sub>2</sub> (110) - Surface

Cr N

|                     |                    |                     |
|---------------------|--------------------|---------------------|
| 1.0000000000000000  |                    |                     |
| 5.6371200000000004  | 0.0000000000000000 | 0.0000000000000000  |
| -1.4093135030247566 | 5.9627453468257468 | 0.0000000000000000  |
| 0.0000000000000000  | 0.0000000000000000 | 32.8644000000000034 |

Cr N

24 16

Selective dynamics

Direct

|                     |                     |                    |   |   |   |
|---------------------|---------------------|--------------------|---|---|---|
| 0.4792800000000028  | 0.9171100000000010  | 0.0618300000000005 | F | F | F |
| 0.3149349999999984  | 0.2597299999999976  | 0.0328200000000010 | F | F | F |
| 0.1715549999999979  | 0.6862100000000027  | 0.0075100000000035 | F | F | F |
| 0.4513499999999979  | 0.8053900000000027  | 0.1451599999999971 | F | F | F |
| 0.2870050000000006  | 0.1480099999999993  | 0.1161499999999975 | F | F | F |
| 0.1436250000000001  | 0.5744899999999973  | 0.0908400000000000 | F | F | F |
| 0.3963616892311532  | 0.6104483017640305  | 0.2179806546558280 | T | T | T |
| -0.0867588400061782 | -0.2162940418520518 | 0.2299477589194733 | T | T | T |
| -0.2765181300828854 | 0.4093090238454242  | 0.1789861144061153 | T | T | T |
| 0.6117117009438667  | 0.5274571405542716  | 0.2933480019319651 | T | T | T |
| 0.2008971432202756  | 0.6719643297660028  | 0.2922903009587287 | T | T | T |
| 0.0156063093851228  | 0.2382991566015941  | 0.2352810763515419 | T | T | T |
| 0.3999650000000017  | 0.5998599999999996  | 0.0478299999999976 | F | F | F |
| 0.0585900000000024  | 0.2343699999999984  | 0.0758300000000034 | F | F | F |
| 0.3720349999999968  | 0.4881400000000014  | 0.1311600000000013 | F | F | F |
| 0.0306599999999975  | 0.1226500000000001  | 0.1591600000000000 | F | F | F |
| 0.3595661272698978  | 0.0846858221618851  | 0.2081051293447883 | T | T | T |
| 0.5988685480617147  | -0.0124046571810642 | 0.2687615458216490 | T | T | T |
| 0.2505987371559207  | 0.1465351200519260  | 0.2981052799458070 | T | T | T |
| 0.4980030863481182  | 0.8351214840322335  | 0.3411869684687887 | T | T | T |
| 0.9792800000000028  | 0.9171100000000010  | 0.0618300000000005 | F | F | F |
| 0.8149349999999984  | 0.2597299999999976  | 0.0328200000000010 | F | F | F |
| 0.6715549999999979  | 0.6862100000000027  | 0.0075100000000035 | F | F | F |
| 0.9513499999999979  | 0.8053900000000027  | 0.1451599999999971 | F | F | F |
| 0.7870050000000006  | 0.1480099999999993  | 0.1161499999999975 | F | F | F |
| 0.6436250000000001  | 0.5744899999999973  | 0.0908400000000000 | F | F | F |
| 0.8027780650871743  | 0.4541989613870979  | 0.2458313818311978 | T | T | T |
| 0.2787036784574656  | -0.1617700426955131 | 0.2428456066798803 | T | T | T |
| 0.6775132776584454  | 0.7160273927760435  | 0.1843007810163346 | T | T | T |
| 0.9440646829601136  | 0.6520815568148648  | 0.3273014091441886 | T | T | T |
| 0.4731913060102857  | 0.1330183580159937  | 0.3454519633126000 | T | T | T |
| 0.2891239489866342  | 0.4214438180377857  | 0.2658557711614157 | T | T | T |
| 0.8999650000000017  | 0.5998599999999996  | 0.0478299999999976 | F | F | F |
| 0.5585900000000024  | 0.2343699999999984  | 0.0758300000000034 | F | F | F |
| 0.8720349999999968  | 0.4881400000000014  | 0.1311600000000013 | F | F | F |
| 0.5306599999999975  | 0.1226500000000001  | 0.1591600000000000 | F | F | F |
| 0.6768993286695490  | 0.2458865435776578  | 0.2308357094394977 | T | T | T |
| -0.0611581528458019 | 0.0026427774646064  | 0.2733033463687308 | T | T | T |
| 0.6002217089824101  | 0.2193683065520067  | 0.3122669815975709 | T | T | T |
| 0.7578426152382519  | 0.6864306816969967  | 0.3437051623365066 | T | T | T |



Cr<sub>3</sub>N<sub>2</sub> (110) + \*OOH

Cr N O H

1.0000000000000000

5.6371200000000004 0.0000000000000000 0.0000000000000000

-1.4093135030247566 5.9627453468257468 0.0000000000000000

0.0000000000000000 0.0000000000000000 32.8644000000000034

Cr N O H

24 16 2 1

Selective dynamics

Direct

0.4792800000000028 0.9171100000000010 0.0618300000000005 F F F

0.3149349999999984 0.2597299999999976 0.0328200000000010 F F F

0.1715549999999979 0.6862100000000027 0.0075100000000035 F F F

0.4513499999999979 0.8053900000000027 0.1451599999999971 F F F

0.2870050000000006 0.1480099999999993 0.1161499999999975 F F F

0.1436250000000001 0.5744899999999973 0.0908400000000000 F F F

0.5910476053743763 0.7198261803777370 0.2525802875885961 T T T

0.3791279728959400 -0.0303667067003835 0.2138670879347934 T T T

0.0306303331459393 0.5945614457511851 0.1799359885637077 T T T

0.6381204658840951 0.7417615407365185 0.3216867032113922 T T T

0.0319427642726220 0.8980893177861999 0.2800570294402702 T T T

0.1224410894717791 0.3139086487890600 0.2819135217327230 T T T

0.3999650000000017 0.5998599999999996 0.0478299999999976 F F F

0.0585900000000024 0.2343699999999984 0.0758300000000034 F F F

0.3720349999999968 0.4881400000000014 0.1311600000000013 F F F

0.0306599999999975 0.1226500000000001 0.1591600000000000 F F F

0.3292790735950367 0.3754502459035968 0.2165282470973282 T T T

0.8189937917729883 0.1629530842271798 0.2275589372980598 T T T

0.5247439987335174 0.1326859547332810 0.2848876319418022 T T T

0.2417263018612862 0.8914368286823526 0.3484326392244155 T T T

0.9119205895125182 0.1480232379226383 0.3416929624998288 T T T

0.9792800000000028 0.9171100000000010 0.0618300000000005 F F F

0.8149349999999984 0.2597299999999976 0.0328200000000010 F F F

0.6715549999999979 0.6862100000000027 0.0075100000000035 F F F

0.9513499999999979 0.8053900000000027 0.1451599999999971 F F F

0.7870050000000006 0.1480099999999993 0.1161499999999975 F F F

0.6436250000000001 0.5744899999999973 0.0908400000000000 F F F

0.9082682509525405 0.6580232364764537 0.2380609670872564 T T T

0.5847208224332413 0.2488342898667437 0.1927678311864695 T T T

0.3918375976095932 0.6748070954850257 0.1991664569720322 T T T

0.9558400437406465 0.6550475969893392 0.3261619119506496 T T T

0.5806697472595369 0.0370218035317930 0.3384019285271374 T T T

0.4685734339271114 0.4226784987134622 0.2760911668625922 T T T

|                     |                    |                    |   |   |   |
|---------------------|--------------------|--------------------|---|---|---|
| 0.8999650000000017  | 0.5998599999999996 | 0.0478299999999976 | F | F | F |
| 0.5585900000000024  | 0.2343699999999984 | 0.0758300000000034 | F | F | F |
| 0.8720349999999968  | 0.4881400000000014 | 0.1311600000000013 | F | F | F |
| 0.5306599999999975  | 0.1226500000000001 | 0.1591600000000000 | F | F | F |
| 0.9694368961432867  | 0.4620575913033646 | 0.2405801685120946 | T | T | T |
| 0.1167003317776060  | 0.0832291347457520 | 0.2309660859620775 | T | T | T |
| -0.0189199886913749 | 0.4465981501699332 | 0.3219499136618054 | T | T | T |
| 0.0863257805732891  | 0.0616513343091730 | 0.3798208543006049 | T | T | T |
| 0.3880540079073676  | 0.6345183871991750 | 0.3652186338195516 | T | T | T |
| 0.4680021626035446  | 0.6615960856981231 | 0.3916910259493125 | T | T | T |

Cr<sub>3</sub>N<sub>2</sub> (110) + \*O

Cr N O

1.0000000000000000

5.6371200000000004 0.0000000000000000 0.0000000000000000

-1.4093135030247566 5.9627453468257468 0.0000000000000000

0.0000000000000000 0.0000000000000000 32.8644000000000034

Cr N O

24 16 1

Selective dynamics

Direct

|                    |                     |                    |   |   |   |
|--------------------|---------------------|--------------------|---|---|---|
| 0.4792800000000028 | 0.9171100000000010  | 0.0618300000000005 | F | F | F |
| 0.3149349999999984 | 0.2597299999999976  | 0.0328200000000010 | F | F | F |
| 0.1715549999999979 | 0.6862100000000027  | 0.0075100000000035 | F | F | F |
| 0.4513499999999979 | 0.8053900000000027  | 0.1451599999999971 | F | F | F |
| 0.2870050000000006 | 0.1480099999999993  | 0.1161499999999975 | F | F | F |
| 0.1436250000000001 | 0.5744899999999973  | 0.0908400000000000 | F | F | F |
| 0.6297760079050954 | 0.7734806953980208  | 0.2502394793046152 | T | T | T |
| 0.2574342222532934 | -0.0339495845165079 | 0.2275664962509299 | T | T | T |
| 0.0443026761799000 | 0.5957805070548921  | 0.1779777911406560 | T | T | T |
| 0.4013714504717608 | 0.6392000938463346  | 0.3098473674016538 | T | T | T |
| 0.0253848923055347 | 0.8639296022209603  | 0.2994678197762065 | T | T | T |
| 0.1068747752284595 | 0.2714757983082718  | 0.2739301314930943 | T | T | T |
| 0.3999650000000017 | 0.5998599999999996  | 0.0478299999999976 | F | F | F |
| 0.0585900000000024 | 0.2343699999999984  | 0.0758300000000034 | F | F | F |
| 0.3720349999999968 | 0.4881400000000014  | 0.1311600000000013 | F | F | F |
| 0.0306599999999975 | 0.1226500000000001  | 0.1591600000000000 | F | F | F |
| 0.3376425626486786 | 0.4068555884616934  | 0.2156609975042027 | T | T | T |
| 0.7115408004585686 | 0.2461199374413108  | 0.2422121164240742 | T | T | T |
| 0.2260234206494477 | 0.1970112354257410  | 0.3495453941832851 | T | T | T |
| 0.4546521258695074 | 0.1003082094968878  | 0.2971054559795090 | T | T | T |
| 0.6453535737070112 | 0.8753827462244352  | 0.3353879939071819 | T | T | T |

|                    |                    |                    |   |   |   |
|--------------------|--------------------|--------------------|---|---|---|
| 0.9792800000000028 | 0.9171100000000010 | 0.0618300000000005 | F | F | F |
| 0.8149349999999984 | 0.2597299999999976 | 0.0328200000000010 | F | F | F |
| 0.6715549999999979 | 0.6862100000000027 | 0.0075100000000035 | F | F | F |
| 0.9513499999999979 | 0.8053900000000027 | 0.1451599999999971 | F | F | F |
| 0.7870050000000006 | 0.1480099999999993 | 0.1161499999999975 | F | F | F |
| 0.6436250000000001 | 0.5744899999999973 | 0.0908400000000000 | F | F | F |
| 0.9679914869640162 | 0.7262389672537858 | 0.2456579277438029 | T | T | T |
| 0.5316385739569630 | 0.2108315066663632 | 0.1947054972667565 | T | T | T |
| 0.4061639926833477 | 0.7280224723481120 | 0.2034383574122678 | T | T | T |
| 0.0481306570434810 | 0.6180169398388622 | 0.3259900597641736 | T | T | T |
| 0.7884058391439105 | 0.0470414552713448 | 0.2845471885721890 | T | T | T |
| 0.4871279955329623 | 0.4261504686233258 | 0.2703076691433057 | T | T | T |
| 0.8999650000000017 | 0.5998599999999996 | 0.0478299999999976 | F | F | F |
| 0.5585900000000024 | 0.2343699999999984 | 0.0758300000000034 | F | F | F |
| 0.8720349999999968 | 0.4881400000000014 | 0.1311600000000013 | F | F | F |
| 0.5306599999999975 | 0.1226500000000001 | 0.1591600000000000 | F | F | F |
| 0.9786808152260510 | 0.5110225541621729 | 0.2365919109136578 | T | T | T |
| 0.0438847213807098 | 0.1584066218251033 | 0.2170881119122900 | T | T | T |
| 0.0808158226972128 | 0.4258543246468574 | 0.3344631972580971 | T | T | T |
| 0.4884103264579508 | 0.0796533016925433 | 0.3604027554239543 | T | T | T |

Cr<sub>3</sub>N<sub>2</sub> (110) + \*OH

Cr N O H

1.0000000000000000

|                     |                    |                     |
|---------------------|--------------------|---------------------|
| 5.6371200000000004  | 0.0000000000000000 | 0.0000000000000000  |
| -1.4093135030247566 | 5.9627453468257468 | 0.0000000000000000  |
| 0.0000000000000000  | 0.0000000000000000 | 32.8644000000000034 |

Cr N O H

24 16 1 1

Selective dynamics

Direct

|                    |                     |                    |   |   |   |
|--------------------|---------------------|--------------------|---|---|---|
| 0.4792800000000028 | 0.9171100000000010  | 0.0618300000000005 | F | F | F |
| 0.3149349999999984 | 0.2597299999999976  | 0.0328200000000010 | F | F | F |
| 0.1715549999999979 | 0.6862100000000027  | 0.0075100000000035 | F | F | F |
| 0.4513499999999979 | 0.8053900000000027  | 0.1451599999999971 | F | F | F |
| 0.2870050000000006 | 0.1480099999999993  | 0.1161499999999975 | F | F | F |
| 0.1436250000000001 | 0.5744899999999973  | 0.0908400000000000 | F | F | F |
| 0.6748685288796330 | 0.7381540964431711  | 0.2481566766347359 | T | T | T |
| 0.3165732558525315 | -0.0326317544017930 | 0.2212711575728539 | T | T | T |
| 0.0226649749234458 | 0.5937922156453033  | 0.1792046981948414 | T | T | T |
| 0.5150552032630201 | 0.7840373879826142  | 0.3146076476194090 | T | T | T |
| 0.0935274228579125 | 0.9128463044605802  | 0.2936652147356529 | T | T | T |

|                    |                    |                    |   |   |   |
|--------------------|--------------------|--------------------|---|---|---|
| 0.2603585300874519 | 0.4517524250983301 | 0.2838669742263996 | T | T | T |
| 0.3999650000000017 | 0.5998599999999996 | 0.0478299999999976 | F | F | F |
| 0.0585900000000024 | 0.2343699999999984 | 0.0758300000000034 | F | F | F |
| 0.3720349999999968 | 0.4881400000000014 | 0.1311600000000013 | F | F | F |
| 0.0306599999999975 | 0.1226500000000001 | 0.1591600000000000 | F | F | F |
| 0.3596278051646253 | 0.4090729256131996 | 0.2151292554329973 | T | T | T |
| 0.7990466892173373 | 0.2298135381117261 | 0.2407637426018690 | T | T | T |
| 0.4758946024957571 | 0.1607414587085170 | 0.2980111855321128 | T | T | T |
| 0.9125332787764496 | 0.1731016805121581 | 0.3347075948858493 | T | T | T |
| 0.5287194383139627 | 0.1239666878602702 | 0.3704385314961791 | T | T | T |
| 0.9792800000000028 | 0.9171100000000010 | 0.0618300000000005 | F | F | F |
| 0.8149349999999984 | 0.2597299999999976 | 0.0328200000000010 | F | F | F |
| 0.6715549999999979 | 0.6862100000000027 | 0.0075100000000035 | F | F | F |
| 0.9513499999999979 | 0.8053900000000027 | 0.1451599999999971 | F | F | F |
| 0.7870050000000006 | 0.1480099999999993 | 0.1161499999999975 | F | F | F |
| 0.6436250000000001 | 0.5744899999999973 | 0.0908400000000000 | F | F | F |
| 0.0213538121057844 | 0.7306039663904644 | 0.2407911583572714 | T | T | T |
| 0.5815044854147786 | 0.2243286852426950 | 0.1941620876783920 | T | T | T |
| 0.4864842060914299 | 0.7302882864065922 | 0.2018012765639962 | T | T | T |
| 0.1606313043488408 | 0.6593936658356774 | 0.3249735406292665 | T | T | T |
| 0.7674002737352701 | 0.0033970786200556 | 0.2858003771994044 | T | T | T |
| 0.5754757722226423 | 0.4287328923601504 | 0.2646822695345034 | T | T | T |
| 0.8999650000000017 | 0.5998599999999996 | 0.0478299999999976 | F | F | F |
| 0.5585900000000024 | 0.2343699999999984 | 0.0758300000000034 | F | F | F |
| 0.8720349999999968 | 0.4881400000000014 | 0.1311600000000013 | F | F | F |
| 0.5306599999999975 | 0.1226500000000001 | 0.1591600000000000 | F | F | F |
| 0.0604965097988997 | 0.5116282269410486 | 0.2390916597967849 | T | T | T |
| 0.0847645063652721 | 0.1465529645918131 | 0.2146305591692663 | T | T | T |
| 0.0343690588128231 | 0.4633815508132381 | 0.3324106854553848 | T | T | T |
| 0.2192066182743079 | 0.0872436947774798 | 0.3437549573302187 | T | T | T |
| 0.8299082184384102 | 0.1282552974835201 | 0.3859345226623513 | T | T | T |

Cr<sub>2</sub>N (110) - Surface

Cr N

|                    |                    |                     |
|--------------------|--------------------|---------------------|
| 1.0000000000000000 |                    |                     |
| 4.3887799999999997 | 0.0000000000000000 | 0.0000000000000000  |
| 0.0000000000000000 | 8.2692700000000006 | 0.0000000000000000  |
| 0.0000000000000000 | 0.0000000000000000 | 28.6456000000000017 |

Cr N

24 12

Selective dynamics

Direct

|                    |                     |                    |   |   |   |
|--------------------|---------------------|--------------------|---|---|---|
| 0.2528999999999968 | 0.1631799999999970  | 0.0127299999999977 | F | F | F |
| 0.2528999999999968 | 0.6631799999999970  | 0.0960600000000014 | F | F | F |
| 0.2528999999999968 | 0.8368200000000030  | 0.0127299999999977 | F | F | F |
| 0.2528999999999968 | 0.3368200000000030  | 0.0960600000000014 | F | F | F |
| 0.2528999999999968 | 0.5000000000000000  | 0.0144700000000029 | F | F | F |
| 0.2528999999999968 | 0.0000000000000000  | 0.0977999999999994 | F | F | F |
| 0.7471000000000032 | 0.5000000000000000  | 0.1232600000000019 | F | F | F |
| 0.7471000000000032 | 0.0000000000000000  | 0.0399200000000022 | F | F | F |
| 0.7471000000000032 | 0.3368200000000030  | 0.0416700000000034 | F | F | F |
| 0.7471000000000032 | 0.8368200000000030  | 0.1250000000000000 | F | F | F |
| 0.7471000000000032 | 0.6631799999999970  | 0.0416700000000034 | F | F | F |
| 0.7471000000000032 | 0.1631799999999970  | 0.1250000000000000 | F | F | F |
| 0.2498608700509189 | 0.1661770120456993  | 0.1800792533888242 | T | T | T |
| 0.2531906643399364 | 0.6718850682177816  | 0.2648917727674691 | T | T | T |
| 0.2498067271963688 | 0.8337787276631299  | 0.1800931806257774 | T | T | T |
| 0.2533352275230251 | 0.3280794057809672  | 0.2648691603780414 | T | T | T |
| 0.2555382575671817 | 0.4999972508696971  | 0.1832381563767014 | T | T | T |
| 0.2246470794759941 | 0.0000043063458053  | 0.2615120060104971 | T | T | T |
| 0.7108229590431240 | 0.4999972232951270  | 0.2897692014051046 | T | T | T |
| 0.7485800688019016 | -0.0000393586493232 | 0.2065072254263040 | T | T | T |
| 0.7528328780549342 | 0.3372594005363551  | 0.2085649428196442 | T | T | T |
| 0.7623752939267744 | 0.8228090396647829  | 0.2893660564418405 | T | T | T |
| 0.7527570440076025 | 0.6626628590693836  | 0.2085792814682405 | T | T | T |
| 0.7624575018085429 | 0.1771594135207845  | 0.2893571800818810 | T | T | T |
| 0.0000000000000000 | 0.5000000000000000  | 0.0688600000000008 | F | F | F |
| 0.0000000000000000 | 0.0000000000000000  | 0.1522000000000006 | F | F | F |
| 0.5000000000000000 | 0.6666700000000034  | 0.1522000000000006 | F | F | F |
| 0.5000000000000000 | 0.1666700000000034  | 0.0688600000000008 | F | F | F |
| 0.5000000000000000 | 0.3333299999999966  | 0.1522000000000006 | F | F | F |
| 0.5000000000000000 | 0.8333299999999966  | 0.0688600000000008 | F | F | F |
| 0.0021839066843494 | 0.4999589406031261  | 0.2397176265681224 | T | T | T |
| 0.9547132076135708 | -0.0000224178016002 | 0.3123807611470300 | T | T | T |
| 0.5278403747353860 | 0.6735098820348836  | 0.3173165312150559 | T | T | T |
| 0.4993601022537301 | 0.1644915577548668  | 0.2364165484835107 | T | T | T |
| 0.5279699394623332 | 0.3264557412662776  | 0.3173013798367910 | T | T | T |
| 0.4992712486271738 | 0.8354490565393111  | 0.2364312295788034 | T | T | T |

Cr<sub>2</sub>N (110) + \*OOH

Cr N O H

|                    |                    |                    |
|--------------------|--------------------|--------------------|
| 1.0000000000000000 |                    |                    |
| 4.3887799999999997 | 0.0000000000000000 | 0.0000000000000000 |
| 0.0000000000000000 | 8.2692700000000006 | 0.0000000000000000 |

0.0000000000000000 0.0000000000000000 28.645600000000017

Cr N O H

24 12 2 1

Selective dynamics

Direct

|                    |                     |                    |   |   |   |
|--------------------|---------------------|--------------------|---|---|---|
| 0.2528999999999968 | 0.1631799999999970  | 0.0127299999999977 | F | F | F |
| 0.2528999999999968 | 0.6631799999999970  | 0.0960600000000014 | F | F | F |
| 0.2528999999999968 | 0.8368200000000030  | 0.0127299999999977 | F | F | F |
| 0.2528999999999968 | 0.3368200000000030  | 0.0960600000000014 | F | F | F |
| 0.2528999999999968 | 0.5000000000000000  | 0.0144700000000029 | F | F | F |
| 0.2528999999999968 | 0.0000000000000000  | 0.0977999999999994 | F | F | F |
| 0.7471000000000032 | 0.5000000000000000  | 0.1232600000000019 | F | F | F |
| 0.7471000000000032 | 0.0000000000000000  | 0.0399200000000022 | F | F | F |
| 0.7471000000000032 | 0.3368200000000030  | 0.0416700000000034 | F | F | F |
| 0.7471000000000032 | 0.8368200000000030  | 0.1250000000000000 | F | F | F |
| 0.7471000000000032 | 0.6631799999999970  | 0.0416700000000034 | F | F | F |
| 0.7471000000000032 | 0.1631799999999970  | 0.1250000000000000 | F | F | F |
| 0.2498707187993779 | 0.1660986295472615  | 0.1800604798179030 | T | T | T |
| 0.2539200717384268 | 0.6676758588043756  | 0.2651885396045890 | T | T | T |
| 0.2515981494727913 | 0.8342465433829337  | 0.1798754411711121 | T | T | T |
| 0.2502797025959701 | 0.3295115518093036  | 0.2653712729761749 | T | T | T |
| 0.2531814033622209 | 0.5003612512226530  | 0.1824167931436021 | T | T | T |
| 0.2237914551408157 | -0.0011797960994516 | 0.2614438115083276 | T | T | T |
| 0.7211724395738019 | 0.4987045020039212  | 0.2899202160894959 | T | T | T |
| 0.7459126696612108 | -0.0004327705775992 | 0.2063663302722401 | T | T | T |
| 0.7516295678640513 | 0.3367173913607909  | 0.2084147235287022 | T | T | T |
| 0.7647465751305494 | 0.8219629968625469  | 0.2906894893624302 | T | T | T |
| 0.7517740180673387 | 0.6637406860963502  | 0.2086439413016049 | T | T | T |
| 0.7595741433719623 | 0.1793624366149650  | 0.2895707848352572 | T | T | T |
| 0.0000000000000000 | 0.5000000000000000  | 0.0688600000000008 | F | F | F |
| 0.0000000000000000 | 0.0000000000000000  | 0.1522000000000006 | F | F | F |
| 0.5000000000000000 | 0.6666700000000034  | 0.1522000000000006 | F | F | F |
| 0.5000000000000000 | 0.1666700000000034  | 0.0688600000000008 | F | F | F |
| 0.5000000000000000 | 0.3333299999999966  | 0.1522000000000006 | F | F | F |
| 0.5000000000000000 | 0.8333299999999966  | 0.0688600000000008 | F | F | F |
| 0.0033035142339655 | 0.4997889666546532  | 0.2387324595772111 | T | T | T |
| 0.9544779269636270 | 0.0013963514921233  | 0.3120769177248275 | T | T | T |
| 0.5044408414991024 | 0.6689127760439749  | 0.3214697777763325 | T | T | T |
| 0.4960918369929578 | 0.1645458858500053  | 0.2367345121216842 | T | T | T |
| 0.5231635731935146 | 0.3280271583428458  | 0.3181222675046607 | T | T | T |
| 0.5000405037790058 | 0.8349384486039184  | 0.2372359135002161 | T | T | T |
| 0.4053424522247958 | 0.6645427756767787  | 0.3671830364502500 | T | T | T |
| 0.6155725674803021 | 0.5607278879876797  | 0.3949379804876632 | T | T | T |
| 0.5448402945638422 | 0.4530739056795887  | 0.3843613282449769 | T | T | T |

Cr<sub>2</sub>N (110) + \*O

Cr N O

1.0000000000000000  
4.3887799999999997 0.0000000000000000 0.0000000000000000  
0.0000000000000000 8.2692700000000006 0.0000000000000000  
0.0000000000000000 0.0000000000000000 28.6456000000000017

Cr N O

24 12 1

Selective dynamics

Direct

|                     |                     |                     |   |   |   |
|---------------------|---------------------|---------------------|---|---|---|
| 0.25289999999999968 | 0.16317999999999970 | 0.01272999999999977 | F | F | F |
| 0.25289999999999968 | 0.66317999999999970 | 0.09606000000000014 | F | F | F |
| 0.25289999999999968 | 0.83682000000000030 | 0.01272999999999977 | F | F | F |
| 0.25289999999999968 | 0.33682000000000030 | 0.09606000000000014 | F | F | F |
| 0.25289999999999968 | 0.50000000000000000 | 0.01447000000000029 | F | F | F |
| 0.25289999999999968 | 0.00000000000000000 | 0.09779999999999994 | F | F | F |
| 0.74710000000000032 | 0.50000000000000000 | 0.12326000000000019 | F | F | F |
| 0.74710000000000032 | 0.00000000000000000 | 0.03992000000000022 | F | F | F |
| 0.74710000000000032 | 0.33682000000000030 | 0.04167000000000034 | F | F | F |
| 0.74710000000000032 | 0.83682000000000030 | 0.12500000000000000 | F | F | F |
| 0.74710000000000032 | 0.66317999999999970 | 0.04167000000000034 | F | F | F |
| 0.74710000000000032 | 0.16317999999999970 | 0.12500000000000000 | F | F | F |
| 0.2488266692477185  | 0.1665455204012431  | 0.1801744422527417  | T | T | T |
| 0.2592965140265013  | 0.6667596898034810  | 0.2642508466748235  | T | T | T |
| 0.2506014565963030  | 0.8333343593723774  | 0.1801545043196957  | T | T | T |
| 0.2521383612652472  | 0.3299953372183558  | 0.2649174895457802  | T | T | T |
| 0.2543276060354946  | 0.5013376804066864  | 0.1826027966177365  | T | T | T |
| 0.2259656187881823  | 0.9978377867672906  | 0.2611894738436396  | T | T | T |
| 0.7161988922458399  | 0.4996331813912989  | 0.2897561913554917  | T | T | T |
| 0.7464486207957882  | -0.0001568078091057 | 0.2061141755807707  | T | T | T |
| 0.7522368071857769  | 0.3370749181973809  | 0.2081462628443243  | T | T | T |
| 0.7647602651262763  | 0.8222942238969251  | 0.2905484349167440  | T | T | T |
| 0.7564936433128137  | 0.6638014972061881  | 0.2082634441763712  | T | T | T |
| 0.7627924631874493  | 0.1796728246440260  | 0.2891056303426323  | T | T | T |
| 0.00000000000000000 | 0.50000000000000000 | 0.06886000000000008 | F | F | F |
| 0.00000000000000000 | 0.00000000000000000 | 0.15220000000000006 | F | F | F |
| 0.50000000000000000 | 0.66667000000000034 | 0.15220000000000006 | F | F | F |
| 0.50000000000000000 | 0.16667000000000034 | 0.06886000000000008 | F | F | F |
| 0.50000000000000000 | 0.33332999999999966 | 0.15220000000000006 | F | F | F |
| 0.50000000000000000 | 0.83332999999999966 | 0.06886000000000008 | F | F | F |
| 0.0019399245880059  | 0.4991544654843994  | 0.2391170872562835  | T | T | T |
| 0.9552069731352844  | 0.0004681708148152  | 0.3117089659382726  | T | T | T |
| 0.5296480202157325  | 0.6763167730029438  | 0.3255030190512919  | T | T | T |

|                    |                    |                    |   |   |   |
|--------------------|--------------------|--------------------|---|---|---|
| 0.4971865769077080 | 0.1646953723792734 | 0.2364875618946858 | T | T | T |
| 0.5241954339887246 | 0.3279834102736333 | 0.3169772293901422 | T | T | T |
| 0.5038493484477365 | 0.8342048849120641 | 0.2373557664415823 | T | T | T |
| 0.4345652501646105 | 0.6707619004632702 | 0.3661975627898459 | T | T | T |

Cr<sub>2</sub>N (110) + \*OH

Cr N O H

|                    |                    |                     |
|--------------------|--------------------|---------------------|
| 1.0000000000000000 |                    |                     |
| 4.3887799999999997 | 0.0000000000000000 | 0.0000000000000000  |
| 0.0000000000000000 | 8.2692700000000006 | 0.0000000000000000  |
| 0.0000000000000000 | 0.0000000000000000 | 28.6456000000000017 |

Cr N O H

24 12 1 1

Selective dynamics

Direct

|                    |                    |                    |   |   |   |
|--------------------|--------------------|--------------------|---|---|---|
| 0.2528999999999968 | 0.1631799999999970 | 0.0127299999999977 | F | F | F |
| 0.2528999999999968 | 0.6631799999999970 | 0.0960600000000014 | F | F | F |
| 0.2528999999999968 | 0.8368200000000030 | 0.0127299999999977 | F | F | F |
| 0.2528999999999968 | 0.3368200000000030 | 0.0960600000000014 | F | F | F |
| 0.2528999999999968 | 0.5000000000000000 | 0.0144700000000029 | F | F | F |
| 0.2528999999999968 | 0.0000000000000000 | 0.0977999999999994 | F | F | F |
| 0.7471000000000032 | 0.5000000000000000 | 0.1232600000000019 | F | F | F |
| 0.7471000000000032 | 0.0000000000000000 | 0.0399200000000022 | F | F | F |
| 0.7471000000000032 | 0.3368200000000030 | 0.0416700000000034 | F | F | F |
| 0.7471000000000032 | 0.8368200000000030 | 0.1250000000000000 | F | F | F |
| 0.7471000000000032 | 0.6631799999999970 | 0.0416700000000034 | F | F | F |
| 0.7471000000000032 | 0.1631799999999970 | 0.1250000000000000 | F | F | F |
| 0.2499090220838680 | 0.1659152840396333 | 0.1801737866929979 | T | T | T |
| 0.2536282827903947 | 0.6686820092922634 | 0.2651786038316635 | T | T | T |
| 0.2516998561525991 | 0.8343645182919344 | 0.1799727888573852 | T | T | T |
| 0.2498762070260354 | 0.3300412274722104 | 0.2654419609930884 | T | T | T |
| 0.2537756763779985 | 0.5003643079882374 | 0.1823190337243655 | T | T | T |
| 0.2220711876071988 | 0.9986156535114874 | 0.2615810901781139 | T | T | T |
| 0.7208256397985188 | 0.4983393322307712 | 0.2891069606704186 | T | T | T |
| 0.7458480655678327 | 0.0001227898308991 | 0.2063934405606389 | T | T | T |
| 0.7512656303926974 | 0.3363839351220383 | 0.2083957597660184 | T | T | T |
| 0.7611821775096211 | 0.8211646997119549 | 0.2911969635595796 | T | T | T |
| 0.7524746560271810 | 0.6643844923543416 | 0.2085276500967981 | T | T | T |
| 0.7570450473124115 | 0.1797045466938871 | 0.2901025080338331 | T | T | T |
| 0.0000000000000000 | 0.5000000000000000 | 0.0688600000000008 | F | F | F |
| 0.0000000000000000 | 0.0000000000000000 | 0.1522000000000006 | F | F | F |
| 0.5000000000000000 | 0.6666700000000034 | 0.1522000000000006 | F | F | F |



|                    |                    |                    |   |   |   |
|--------------------|--------------------|--------------------|---|---|---|
| 0.5000000000000000 | 0.1666700000000034 | 0.0688600000000008 | F | F | F |
| 0.5000000000000000 | 0.3333299999999966 | 0.1522000000000006 | F | F | F |
| 0.5000000000000000 | 0.8333299999999966 | 0.0688600000000008 | F | F | F |
| 0.0048874679469553 | 0.5002508222303962 | 0.2384245036870959 | T | T | T |
| 0.9516150036326289 | 0.0005282180882565 | 0.3121388667080364 | T | T | T |
| 0.5107771298156877 | 0.6675805289154561 | 0.3216235677574477 | T | T | T |
| 0.4953525915574331 | 0.1645756942294330 | 0.2370108443525848 | T | T | T |
| 0.5238670525941618 | 0.3308895970940173 | 0.3184365886251559 | T | T | T |
| 0.5003119754894964 | 0.8353237874682941 | 0.2373630863379476 | T | T | T |
| 0.4321637683874576 | 0.6561108550924081 | 0.3689905762980165 | T | T | T |
| 0.4150780588350791 | 0.5384968959996830 | 0.3743042256156489 | T | T | T |

MnN (100) - Surface

Mn N

|                    |                    |                    |
|--------------------|--------------------|--------------------|
| 1.0000000000000000 |                    |                    |
| 6.0279400000000001 | 0.0000000000000000 | 0.0000000000000000 |
| 3.0139700000000009 | 5.2203491724883690 | 0.0000000000000000 |
| 0.0000000000000000 | 0.0000000000000000 | 29.530699999999995 |

Mn N

16 16

Selective dynamics

Direct

|                    |                    |                    |   |   |   |
|--------------------|--------------------|--------------------|---|---|---|
| 0.0625000000000000 | 0.3750000000000000 | 0.0312500000000000 | F | F | F |
| 0.2291700000000034 | 0.0416700000000034 | 0.1145799999999966 | F | F | F |
| 0.3956497321636986 | 0.2080340142002631 | 0.1986476916777432 | T | T | T |
| 0.0621698111750416 | 0.3745804846071749 | 0.2832881121319949 | T | T | T |
| 0.0625000000000000 | 0.8750000000000000 | 0.0312500000000000 | F | F | F |
| 0.2291700000000034 | 0.5416699999999963 | 0.1145799999999966 | F | F | F |
| 0.3956064927255862 | 0.7079726994700108 | 0.1986577974769688 | T | T | T |
| 0.0621732047782275 | 0.8745631384327724 | 0.2833022345277099 | T | T | T |
| 0.5625000000000000 | 0.3750000000000000 | 0.0312500000000000 | F | F | F |
| 0.7291700000000034 | 0.0416700000000034 | 0.1145799999999966 | F | F | F |
| 0.8955582196586434 | 0.2080110455178228 | 0.1986572814364621 | T | T | T |
| 0.5621816828780907 | 0.3745484336974884 | 0.2833336823519791 | T | T | T |
| 0.5625000000000000 | 0.8750000000000000 | 0.0312500000000000 | F | F | F |
| 0.7291700000000034 | 0.5416699999999963 | 0.1145799999999966 | F | F | F |
| 0.8956174027568589 | 0.7080289293849250 | 0.1986427236355116 | T | T | T |
| 0.5621922255391792 | 0.8745592887035829 | 0.2832968345264285 | T | T | T |
| 0.2291700000000034 | 0.0416700000000034 | 0.0520799999999966 | F | F | F |
| 0.3958299999999966 | 0.2083299999999966 | 0.1354200000000034 | F | F | F |
| 0.0622234995056851 | 0.3748135625342278 | 0.2216783316641276 | T | T | T |
| 0.2288678964433882 | 0.0412539424102866 | 0.3007002516696603 | T | T | T |

|                    |                    |                    |   |   |   |
|--------------------|--------------------|--------------------|---|---|---|
| 0.2291700000000034 | 0.5416699999999963 | 0.0520799999999966 | F | F | F |
| 0.3958299999999966 | 0.7083299999999966 | 0.1354200000000034 | F | F | F |
| 0.0621605387788026 | 0.8746625019787686 | 0.2216961247756039 | T | T | T |
| 0.2287884874751957 | 0.5412407530827172 | 0.3007216032150401 | T | T | T |
| 0.7291700000000034 | 0.0416700000000034 | 0.0520799999999966 | F | F | F |
| 0.8958299999999966 | 0.2083299999999966 | 0.1354200000000034 | F | F | F |
| 0.5622877107754570 | 0.3746516383271398 | 0.2217362346474535 | T | T | T |
| 0.7288479884919136 | 0.0411720070584419 | 0.3007317781010664 | T | T | T |
| 0.7291700000000034 | 0.5416699999999963 | 0.0520799999999966 | F | F | F |
| 0.8958299999999966 | 0.7083299999999966 | 0.1354200000000034 | F | F | F |
| 0.5624172959862987 | 0.8746651654216518 | 0.2216898371021870 | T | T | T |
| 0.7288758241496834 | 0.5412680762443289 | 0.3007052889354681 | T | T | T |

MnN (100) + \*OOH

Mn N O H

|                    |                    |                     |  |  |  |
|--------------------|--------------------|---------------------|--|--|--|
| 1.0000000000000000 |                    |                     |  |  |  |
| 6.0279400000000001 | 0.0000000000000000 | 0.0000000000000000  |  |  |  |
| 3.0139700000000009 | 5.2203491724883690 | 0.0000000000000000  |  |  |  |
| 0.0000000000000000 | 0.0000000000000000 | 29.5306999999999995 |  |  |  |

Mn N O H

16 16 2 1

Selective dynamics

Direct

|                    |                    |                    |   |   |   |
|--------------------|--------------------|--------------------|---|---|---|
| 0.0625000000000000 | 0.3750000000000000 | 0.0312500000000000 | F | F | F |
| 0.2291700000000034 | 0.0416700000000034 | 0.1145799999999966 | F | F | F |
| 0.3990200146371193 | 0.2117446812272784 | 0.1985969615288428 | T | T | T |
| 0.0592572223477269 | 0.3711324294149964 | 0.2827491695513143 | T | T | T |
| 0.0625000000000000 | 0.8750000000000000 | 0.0312500000000000 | F | F | F |
| 0.2291700000000034 | 0.5416699999999963 | 0.1145799999999966 | F | F | F |
| 0.3964201211860431 | 0.6969667457867866 | 0.1992643929251691 | T | T | T |
| 0.0590582433489687 | 0.8715872711071007 | 0.2842543742199514 | T | T | T |
| 0.5625000000000000 | 0.3750000000000000 | 0.0312500000000000 | F | F | F |
| 0.7291700000000034 | 0.0416700000000034 | 0.1145799999999966 | F | F | F |
| 0.8837924854484902 | 0.2097421630586975 | 0.1993459352950824 | T | T | T |
| 0.5578221486778880 | 0.3704414259590640 | 0.3041995963100344 | T | T | T |
| 0.5625000000000000 | 0.8750000000000000 | 0.0312500000000000 | F | F | F |
| 0.7291700000000034 | 0.5416699999999963 | 0.1145799999999966 | F | F | F |
| 0.8925620601031892 | 0.7058608215043609 | 0.1985686085396865 | T | T | T |
| 0.5575628725297045 | 0.8724730772897105 | 0.2828888987799252 | T | T | T |
| 0.2291700000000034 | 0.0416700000000034 | 0.0520799999999966 | F | F | F |
| 0.3958299999999966 | 0.2083299999999966 | 0.1354200000000034 | F | F | F |
| 0.0677884431864767 | 0.3725233242723804 | 0.2200619911380297 | T | T | T |

|                    |                    |                    |   |   |   |
|--------------------|--------------------|--------------------|---|---|---|
| 0.2248760943046501 | 0.0402150681116007 | 0.2984198580655251 | T | T | T |
| 0.2291700000000034 | 0.5416699999999963 | 0.0520799999999966 | F | F | F |
| 0.3958299999999966 | 0.7083299999999966 | 0.1354200000000034 | F | F | F |
| 0.0575485872298238 | 0.8707734155908186 | 0.2221257097152390 | T | T | T |
| 0.2009837974312994 | 0.5494787771070292 | 0.3012014320069993 | T | T | T |
| 0.7291700000000034 | 0.0416700000000034 | 0.0520799999999966 | F | F | F |
| 0.8958299999999966 | 0.2083299999999966 | 0.1354200000000034 | F | F | F |
| 0.5550971623010581 | 0.3682588495731493 | 0.2240125417935697 | T | T | T |
| 0.7360382616286582 | 0.0145936784968355 | 0.3013982494792374 | T | T | T |
| 0.7291700000000034 | 0.5416699999999963 | 0.0520799999999966 | F | F | F |
| 0.8958299999999966 | 0.7083299999999966 | 0.1354200000000034 | F | F | F |
| 0.5599150650968727 | 0.8803937800749970 | 0.2202482737080604 | T | T | T |
| 0.7361793180655828 | 0.5497443926001117 | 0.2996997429832357 | T | T | T |
| 0.5798508415564080 | 0.3390464268051438 | 0.3659438613575232 | T | T | T |
| 0.4484327958397713 | 0.5883989825958809 | 0.3870425605328729 | T | T | T |
| 0.5931509551482727 | 0.6120806109971242 | 0.3953635819314024 | T | T | T |

MnN (100) + \*O

Mn N O

|                    |                    |                     |
|--------------------|--------------------|---------------------|
| 1.0000000000000000 |                    |                     |
| 6.0279400000000001 | 0.0000000000000000 | 0.0000000000000000  |
| 3.0139700000000009 | 5.2203491724883690 | 0.0000000000000000  |
| 0.0000000000000000 | 0.0000000000000000 | 29.5306999999999995 |

Mn N O

16 16 1

Selective dynamics

Direct

|                    |                    |                    |   |   |   |
|--------------------|--------------------|--------------------|---|---|---|
| 0.0625000000000000 | 0.3750000000000000 | 0.0312500000000000 | F | F | F |
| 0.2291700000000034 | 0.0416700000000034 | 0.1145799999999966 | F | F | F |
| 0.3962756139423267 | 0.2068968012587030 | 0.1983801896876437 | T | T | T |
| 0.0593756138210473 | 0.3739803313265689 | 0.2850674430370555 | T | T | T |
| 0.0625000000000000 | 0.8750000000000000 | 0.0312500000000000 | F | F | F |
| 0.2291700000000034 | 0.5416699999999963 | 0.1145799999999966 | F | F | F |
| 0.3961439246856540 | 0.7041292146060647 | 0.1985252693064009 | T | T | T |
| 0.0594231128964083 | 0.8694945275543978 | 0.2851533338123668 | T | T | T |
| 0.5625000000000000 | 0.3750000000000000 | 0.0312500000000000 | F | F | F |
| 0.7291700000000034 | 0.0416700000000034 | 0.1145799999999966 | F | F | F |
| 0.8923061548829438 | 0.2074132879570140 | 0.1986576262646243 | T | T | T |
| 0.5574800231637743 | 0.3724013942732468 | 0.3223968939683223 | T | T | T |
| 0.5625000000000000 | 0.8750000000000000 | 0.0312500000000000 | F | F | F |
| 0.7291700000000034 | 0.5416699999999963 | 0.1145799999999966 | F | F | F |
| 0.8938542912441509 | 0.7061827857636158 | 0.1996072823210741 | T | T | T |

|                    |                    |                    |   |   |   |
|--------------------|--------------------|--------------------|---|---|---|
| 0.5629336970031424 | 0.8698860342964551 | 0.2856570473853138 | T | T | T |
| 0.2291700000000034 | 0.0416700000000034 | 0.0520799999999966 | F | F | F |
| 0.3958299999999966 | 0.2083299999999966 | 0.1354200000000034 | F | F | F |
| 0.0628032172745105 | 0.3741465737119820 | 0.2223867525916950 | T | T | T |
| 0.2222821021805211 | 0.0406448552984905 | 0.3001796255612025 | T | T | T |
| 0.2291700000000034 | 0.5416699999999963 | 0.0520799999999966 | F | F | F |
| 0.3958299999999966 | 0.7083299999999966 | 0.1354200000000034 | F | F | F |
| 0.0614240310444401 | 0.8703649930429390 | 0.2224882266450699 | T | T | T |
| 0.2123867007766755 | 0.5447243729339268 | 0.3041351492991631 | T | T | T |
| 0.7291700000000034 | 0.0416700000000034 | 0.0520799999999966 | F | F | F |
| 0.8958299999999966 | 0.2083299999999966 | 0.1354200000000034 | F | F | F |
| 0.5591247731707677 | 0.3734074874498684 | 0.2160603877152402 | T | T | T |
| 0.7340121415110242 | 0.0277154731586536 | 0.3039068056171276 | T | T | T |
| 0.7291700000000034 | 0.5416699999999963 | 0.0520799999999966 | F | F | F |
| 0.8958299999999966 | 0.7083299999999966 | 0.1354200000000034 | F | F | F |
| 0.5612513436524629 | 0.8736259896916552 | 0.2221687621047350 | T | T | T |
| 0.7339986676546927 | 0.5402581412443727 | 0.3035114155988689 | T | T | T |
| 0.5585090759452203 | 0.3724811752013087 | 0.3764405371398035 | T | T | T |

MnN (100) + \*OH

Mn N O H

|                    |                    |                    |  |
|--------------------|--------------------|--------------------|--|
| 1.0000000000000000 |                    |                    |  |
| 6.0279400000000001 | 0.0000000000000000 | 0.0000000000000000 |  |
| 3.0139700000000009 | 5.2203491724883690 | 0.0000000000000000 |  |
| 0.0000000000000000 | 0.0000000000000000 | 29.530699999999995 |  |

Mn N O H

16 16 1 1

Selective dynamics

Direct

|                    |                    |                    |   |   |   |
|--------------------|--------------------|--------------------|---|---|---|
| 0.0625000000000000 | 0.3750000000000000 | 0.0312500000000000 | F | F | F |
| 0.2291700000000034 | 0.0416700000000034 | 0.1145799999999966 | F | F | F |
| 0.4002637591347539 | 0.2100672286284000 | 0.1985612534881924 | T | T | T |
| 0.0625150799228883 | 0.3672934970335930 | 0.2818374229335431 | T | T | T |
| 0.0625000000000000 | 0.8750000000000000 | 0.0312500000000000 | F | F | F |
| 0.2291700000000034 | 0.5416699999999963 | 0.1145799999999966 | F | F | F |
| 0.3998575103157916 | 0.6948589718350511 | 0.1991140333278018 | T | T | T |
| 0.0613748899876811 | 0.8706473996190298 | 0.2830199736125829 | T | T | T |
| 0.5625000000000000 | 0.3750000000000000 | 0.0312500000000000 | F | F | F |
| 0.7291700000000034 | 0.0416700000000034 | 0.1145799999999966 | F | F | F |
| 0.8842342240126699 | 0.2103043053726535 | 0.1987933908181013 | T | T | T |
| 0.5603160938018124 | 0.3689173968367283 | 0.3035623040025305 | T | T | T |
| 0.5625000000000000 | 0.8750000000000000 | 0.0312500000000000 | F | F | F |

|                    |                    |                    |   |   |   |
|--------------------|--------------------|--------------------|---|---|---|
| 0.7291700000000034 | 0.5416699999999963 | 0.1145799999999966 | F | F | F |
| 0.8947528963057197 | 0.7059203499009683 | 0.1980781928642319 | T | T | T |
| 0.5603398026304250 | 0.8705272506839594 | 0.2827085604368276 | T | T | T |
| 0.2291700000000034 | 0.0416700000000034 | 0.0520799999999966 | F | F | F |
| 0.3958299999999966 | 0.2083299999999966 | 0.1354200000000034 | F | F | F |
| 0.0635714948588926 | 0.3726647648580779 | 0.2188925939807206 | T | T | T |
| 0.2280641585158758 | 0.0371441624897603 | 0.2982660642285725 | T | T | T |
| 0.2291700000000034 | 0.5416699999999963 | 0.0520799999999966 | F | F | F |
| 0.3958299999999966 | 0.7083299999999966 | 0.1354200000000034 | F | F | F |
| 0.0570006136861757 | 0.8733298665520888 | 0.2205885559391607 | T | T | T |
| 0.2019513694778732 | 0.5488695798148842 | 0.2992626637935538 | T | T | T |
| 0.7291700000000034 | 0.0416700000000034 | 0.0520799999999966 | F | F | F |
| 0.8958299999999966 | 0.2083299999999966 | 0.1354200000000034 | F | F | F |
| 0.5617534174277827 | 0.3662016006685250 | 0.2236376825200938 | T | T | T |
| 0.7404750997271755 | 0.0113299636279256 | 0.3010852391116551 | T | T | T |
| 0.7291700000000034 | 0.5416699999999963 | 0.0520799999999966 | F | F | F |
| 0.8958299999999966 | 0.7083299999999966 | 0.1354200000000034 | F | F | F |
| 0.5638895154009026 | 0.8759222683829938 | 0.2200211867051662 | T | T | T |
| 0.7405705469552141 | 0.5477751414552949 | 0.2987193533770164 | T | T | T |
| 0.5558605535300672 | 0.3697620420761830 | 0.3649036904416826 | T | T | T |
| 0.6684624491807328 | 0.1991586358304858 | 0.3772893392690580 | T | T | T |

Nb<sub>4</sub>N<sub>5</sub> (100) - Surface

Nb N

|                     |                     |                     |
|---------------------|---------------------|---------------------|
| 1.0000000000000000  |                     |                     |
| 5.3445200000000002  | 0.0000000000000000  | 0.0000000000000000  |
| -1.7272543693964146 | 10.5485218558526483 | 0.0000000000000000  |
| 0.0000000000000000  | 0.0000000000000000  | 29.2037000000000013 |

Nb N

16 20

Selective dynamics

Direct

|                    |                    |                    |   |   |   |
|--------------------|--------------------|--------------------|---|---|---|
| 0.4208900000000000 | 0.1857100000000003 | 0.1081700000000012 | F | F | F |
| 0.4004699999999985 | 0.0837300000000027 | 0.0056799999999981 | F | F | F |
| 0.6826200000000000 | 0.3747200000000035 | 0.0316499999999991 | F | F | F |
| 0.9404299999999992 | 0.1336399999999998 | 0.0541600000000031 | F | F | F |
| 0.7343229421803670 | 0.0251660989309214 | 0.2250791268382200 | T | T | T |
| 0.6901403948268173 | 0.4470567350261742 | 0.1270876068686638 | T | T | T |
| 0.9812984146436868 | 0.2332140986823324 | 0.1604535515290029 | T | T | T |
| 0.2324130842917316 | 0.4879178366680899 | 0.1885315569223498 | T | T | T |
| 0.4208900000000000 | 0.6857100000000003 | 0.1081700000000012 | F | F | F |

|                    |                    |                    |   |   |   |
|--------------------|--------------------|--------------------|---|---|---|
| 0.4004699999999985 | 0.5837300000000027 | 0.0056799999999981 | F | F | F |
| 0.6826200000000000 | 0.8747200000000035 | 0.0316499999999991 | F | F | F |
| 0.9404299999999992 | 0.6336399999999998 | 0.0541600000000031 | F | F | F |
| 0.7341520360854594 | 0.5251998339830238 | 0.2250692206568394 | T | T | T |
| 0.6902435434310774 | 0.9470836650134447 | 0.1270903645021745 | T | T | T |
| 0.9812560656902699 | 0.7332369453983228 | 0.1604290835106227 | T | T | T |
| 0.2325448631003520 | 0.9878635859491803 | 0.1885245104550515 | T | T | T |
| 0.0415399999999977 | 0.4792300000000012 | 0.0186700000000002 | F | F | F |
| 0.0536699999999968 | 0.0664599999999993 | 0.1193200000000019 | F | F | F |
| 0.8081099999999992 | 0.2907399999999996 | 0.0928299999999993 | F | F | F |
| 0.5531999999999968 | 0.0285999999999973 | 0.0694999999999979 | F | F | F |
| 0.3076399999999992 | 0.2528799999999976 | 0.0430100000000024 | F | F | F |
| 0.3334830127335220 | 0.3396503513677391 | 0.1449684825481490 | T | T | T |
| 0.3857548932415856 | 0.4591681851941633 | 0.2448261796435686 | T | T | T |
| 0.0621190688643090 | 0.1449414759682376 | 0.2168522303210031 | T | T | T |
| 0.8494688650556982 | 0.3845994500695953 | 0.1944356479671060 | T | T | T |
| 0.5955583993056931 | 0.1072631654311149 | 0.1707223621816994 | T | T | T |
| 0.0415399999999977 | 0.9792300000000012 | 0.0186700000000002 | F | F | F |
| 0.0536699999999968 | 0.5664599999999993 | 0.1193200000000019 | F | F | F |
| 0.8081099999999992 | 0.7907399999999996 | 0.0928299999999993 | F | F | F |
| 0.5531999999999968 | 0.5285999999999973 | 0.0694999999999979 | F | F | F |
| 0.3076399999999992 | 0.7528799999999976 | 0.0430100000000024 | F | F | F |
| 0.3335122221387922 | 0.8396335931058801 | 0.1449725637721258 | T | T | T |
| 0.3859134097948910 | 0.9590250094111598 | 0.2448248635866055 | T | T | T |
| 0.0619372834046460 | 0.6449665575349792 | 0.2168491926632551 | T | T | T |
| 0.8495485548719025 | 0.8845876410304756 | 0.1944375596452295 | T | T | T |
| 0.5954780976439416 | 0.6072825961044815 | 0.1707031200499467 | T | T | T |

Nb<sub>4</sub>N<sub>5</sub> (100) + \*OOH

Nb N O H

|                     |                     |                     |
|---------------------|---------------------|---------------------|
| 1.0000000000000000  |                     |                     |
| 5.3445200000000002  | 0.0000000000000000  | 0.0000000000000000  |
| -1.7272543693964146 | 10.5485218558526483 | 0.0000000000000000  |
| 0.0000000000000000  | 0.0000000000000000  | 29.2037000000000013 |

Nb N O H

16 20 2 1

Selective dynamics

Direct

|                    |                    |                    |   |   |   |
|--------------------|--------------------|--------------------|---|---|---|
| 0.4208900000000000 | 0.1857100000000003 | 0.1081700000000012 | F | F | F |
| 0.4004699999999985 | 0.0837300000000027 | 0.0056799999999981 | F | F | F |
| 0.6826200000000000 | 0.3747200000000035 | 0.0316499999999991 | F | F | F |
| 0.9404299999999992 | 0.1336399999999998 | 0.0541600000000031 | F | F | F |

|                    |                     |                    |   |   |   |
|--------------------|---------------------|--------------------|---|---|---|
| 0.7163181388510456 | 0.0238320651609883  | 0.2237464516167240 | T | T | T |
| 0.6885369478678811 | 0.4468022330814647  | 0.1267643158387591 | T | T | T |
| 0.9770969065481362 | 0.2297303308541261  | 0.1617891291588134 | T | T | T |
| 0.2323056751401142 | 0.4865307511608434  | 0.1883255463088837 | T | T | T |
| 0.4208900000000000 | 0.6857100000000003  | 0.1081700000000012 | F | F | F |
| 0.4004699999999985 | 0.5837300000000027  | 0.0056799999999981 | F | F | F |
| 0.6826200000000000 | 0.8747200000000035  | 0.0316499999999991 | F | F | F |
| 0.9404299999999992 | 0.6336399999999998  | 0.0541600000000031 | F | F | F |
| 0.7337856731209379 | 0.5244194485282918  | 0.2255295798853229 | T | T | T |
| 0.6788480271180177 | 0.9436809706610872  | 0.1271005071487916 | T | T | T |
| 0.9795127327713030 | 0.7325351008972903  | 0.1610917018312269 | T | T | T |
| 0.2277167068677745 | -0.0049310869164746 | 0.1836044037615311 | T | T | T |
| 0.0415399999999977 | 0.4792300000000012  | 0.0186700000000002 | F | F | F |
| 0.0536699999999968 | 0.0664599999999993  | 0.1193200000000019 | F | F | F |
| 0.8081099999999992 | 0.2907399999999996  | 0.0928299999999993 | F | F | F |
| 0.5531999999999968 | 0.0285999999999973  | 0.0694999999999979 | F | F | F |
| 0.3076399999999992 | 0.2528799999999976  | 0.0430100000000024 | F | F | F |
| 0.3313465512369319 | 0.3384088851428221  | 0.1450645522839729 | T | T | T |
| 0.3852834889296692 | 0.4569871739477135  | 0.2445348833583798 | T | T | T |
| 0.0593211298388339 | 0.1407570857656422  | 0.2175887327574900 | T | T | T |
| 0.8472076760510320 | 0.3846627465419054  | 0.1944536550410728 | T | T | T |
| 0.5963607649348590 | 0.1109630534508437  | 0.1689646166210853 | T | T | T |
| 0.0415399999999977 | 0.9792300000000012  | 0.0186700000000002 | F | F | F |
| 0.0536699999999968 | 0.5664599999999993  | 0.1193200000000019 | F | F | F |
| 0.8081099999999992 | 0.7907399999999996  | 0.0928299999999993 | F | F | F |
| 0.5531999999999968 | 0.5285999999999973  | 0.0694999999999979 | F | F | F |
| 0.3076399999999992 | 0.7528799999999976  | 0.0430100000000024 | F | F | F |
| 0.3275928692112289 | 0.8394607907418965  | 0.1446433974031412 | T | T | T |
| 0.3708894300335723 | 0.9545812116326198  | 0.2498668147778195 | T | T | T |
| 0.0623239908723385 | 0.6448675802225143  | 0.2169185608120039 | T | T | T |
| 0.8423539886442021 | 0.8846557866452767  | 0.1929214922527229 | T | T | T |
| 0.5957742878242869 | 0.6061942781415710  | 0.1709781799082385 | T | T | T |
| 0.2195074576243115 | -0.0667145171162948 | 0.2837475793647850 | T | T | T |
| 0.3969067390763558 | 0.9467247751585516  | 0.3335990576327225 | T | T | T |
| 0.2796940820925904 | 0.9894484050596652  | 0.3512811128631382 | T | T | T |

Nb<sub>4</sub>N<sub>5</sub> (100) + \*O

Nb N O

|                     |                     |                     |
|---------------------|---------------------|---------------------|
| 1.0000000000000000  |                     |                     |
| 5.3445200000000002  | 0.0000000000000000  | 0.0000000000000000  |
| -1.7272543693964146 | 10.5485218558526483 | 0.0000000000000000  |
| 0.0000000000000000  | 0.0000000000000000  | 29.2037000000000013 |

Nb N O  
16 20 1

Selective dynamics

Direct

|                    |                    |                    |   |   |   |
|--------------------|--------------------|--------------------|---|---|---|
| 0.4208900000000000 | 0.1857100000000003 | 0.1081700000000012 | F | F | F |
| 0.4004699999999985 | 0.0837300000000027 | 0.0056799999999981 | F | F | F |
| 0.6826200000000000 | 0.3747200000000035 | 0.0316499999999991 | F | F | F |
| 0.9404299999999992 | 0.1336399999999998 | 0.0541600000000031 | F | F | F |
| 0.7383645686720500 | 0.0262671114771996 | 0.2256547585679100 | T | T | T |
| 0.6899721396112597 | 0.4475053275845584 | 0.1273893556824144 | T | T | T |
| 0.9762986952999168 | 0.2352033745882747 | 0.1591817619569046 | T | T | T |
| 0.2316547004029085 | 0.4880911717399149 | 0.1882769568603462 | T | T | T |
| 0.4208900000000000 | 0.6857100000000003 | 0.1081700000000012 | F | F | F |
| 0.4004699999999985 | 0.5837300000000027 | 0.0056799999999981 | F | F | F |
| 0.6826200000000000 | 0.8747200000000035 | 0.0316499999999991 | F | F | F |
| 0.9404299999999992 | 0.6336399999999998 | 0.0541600000000031 | F | F | F |
| 0.7333027897616060 | 0.5256356861920457 | 0.2252162877759325 | T | T | T |
| 0.6863519799387950 | 0.9465271608018947 | 0.1267157165089524 | T | T | T |
| 0.9817352812177859 | 0.7336694727606089 | 0.1604757184722456 | T | T | T |
| 0.2280635801998085 | 0.9903588514704446 | 0.1867854235090814 | T | T | T |
| 0.0415399999999977 | 0.4792300000000012 | 0.0186700000000002 | F | F | F |
| 0.0536699999999968 | 0.0664599999999993 | 0.1193200000000019 | F | F | F |
| 0.8081099999999992 | 0.2907399999999996 | 0.0928299999999993 | F | F | F |
| 0.5531999999999968 | 0.0285999999999973 | 0.0694999999999979 | F | F | F |
| 0.3076399999999992 | 0.2528799999999976 | 0.0430100000000024 | F | F | F |
| 0.3313842525353773 | 0.3395974189226461 | 0.1449513604838141 | T | T | T |
| 0.3849508491768920 | 0.4589464530876905 | 0.2445571010598268 | T | T | T |
| 0.0544930671661718 | 0.1447395316138991 | 0.2167603845833023 | T | T | T |
| 0.8479708257814166 | 0.3847762261974752 | 0.1946762576768622 | T | T | T |
| 0.5929802705493630 | 0.1070959590154853 | 0.1698072178932943 | T | T | T |
| 0.0415399999999977 | 0.9792300000000012 | 0.0186700000000002 | F | F | F |
| 0.0536699999999968 | 0.5664599999999993 | 0.1193200000000019 | F | F | F |
| 0.8081099999999992 | 0.7907399999999996 | 0.0928299999999993 | F | F | F |
| 0.5531999999999968 | 0.5285999999999973 | 0.0694999999999979 | F | F | F |
| 0.3076399999999992 | 0.7528799999999976 | 0.0430100000000024 | F | F | F |
| 0.3340398794908512 | 0.8392303203165270 | 0.1443628907014814 | T | T | T |
| 0.3513102325079335 | 0.9504916295596010 | 0.2449493785204011 | T | T | T |
| 0.0617114962712763 | 0.6458240156563374 | 0.2166943914359842 | T | T | T |
| 0.8440320768283872 | 0.8859581014555424 | 0.1942449356601190 | T | T | T |
| 0.5950722548155473 | 0.6078773000455212 | 0.1706759722609849 | T | T | T |
| 0.5093072439628666 | 0.9494480829187685 | 0.2802061725536973 | T | T | T |

Nb<sub>4</sub>N<sub>5</sub> (100) + \*OH



Nb N O H

1.0000000000000000

5.3445200000000002 0.0000000000000000 0.0000000000000000  
-1.7272543693964146 10.5485218558526483 0.0000000000000000  
0.0000000000000000 0.0000000000000000 29.2037000000000013

Nb N O H

16 20 1 1

Selective dynamics

Direct

|                    |                     |                    |   |   |   |
|--------------------|---------------------|--------------------|---|---|---|
| 0.4208900000000000 | 0.1857100000000003  | 0.1081700000000012 | F | F | F |
| 0.4004699999999985 | 0.0837300000000027  | 0.0056799999999981 | F | F | F |
| 0.6826200000000000 | 0.3747200000000035  | 0.0316499999999991 | F | F | F |
| 0.9404299999999992 | 0.1336399999999998  | 0.0541600000000031 | F | F | F |
| 0.7562776393134356 | 0.0066486306107195  | 0.2356917768950653 | T | T | T |
| 0.6854112956277624 | 0.4453827526750507  | 0.1268094955044115 | T | T | T |
| 0.9720847686795725 | 0.2238790105858421  | 0.1631972985673429 | T | T | T |
| 0.2319988658383439 | 0.4850613630392339  | 0.1876398175262503 | T | T | T |
| 0.4208900000000000 | 0.6857100000000003  | 0.1081700000000012 | F | F | F |
| 0.4004699999999985 | 0.5837300000000027  | 0.0056799999999981 | F | F | F |
| 0.6826200000000000 | 0.8747200000000035  | 0.0316499999999991 | F | F | F |
| 0.9404299999999992 | 0.6336399999999998  | 0.0541600000000031 | F | F | F |
| 0.7326669283428748 | 0.5228336352352579  | 0.2254283477388365 | T | T | T |
| 0.6899102105290997 | 0.9481986116009468  | 0.1272566773405666 | T | T | T |
| 0.9876010044427874 | 0.7308914505819910  | 0.1615734105943761 | T | T | T |
| 0.2522386198332166 | -0.0105459625443417 | 0.1886874689702871 | T | T | T |
| 0.0415399999999977 | 0.4792300000000012  | 0.0186700000000002 | F | F | F |
| 0.0536699999999968 | 0.0664599999999993  | 0.1193200000000019 | F | F | F |
| 0.8081099999999992 | 0.2907399999999996  | 0.0928299999999993 | F | F | F |
| 0.5531999999999968 | 0.0285999999999973  | 0.0694999999999979 | F | F | F |
| 0.3076399999999992 | 0.2528799999999976  | 0.0430100000000024 | F | F | F |
| 0.3267288948705981 | 0.3361999811528668  | 0.1451732113531517 | T | T | T |
| 0.3842870877742560 | 0.4555443404512730  | 0.2440254378773252 | T | T | T |
| 0.0645479647903641 | 0.1389743624741508  | 0.2168975875152666 | T | T | T |
| 0.8455658982875720 | 0.3833595337076253  | 0.1938976112761827 | T | T | T |
| 0.5956875672805360 | 0.1069177974026983  | 0.1690759970109553 | T | T | T |
| 0.0415399999999977 | 0.9792300000000012  | 0.0186700000000002 | F | F | F |
| 0.0536699999999968 | 0.5664599999999993  | 0.1193200000000019 | F | F | F |
| 0.8081099999999992 | 0.7907399999999996  | 0.0928299999999993 | F | F | F |
| 0.5531999999999968 | 0.5285999999999973  | 0.0694999999999979 | F | F | F |
| 0.3076399999999992 | 0.7528799999999976  | 0.0430100000000024 | F | F | F |
| 0.3376447228239370 | 0.8383809598582619  | 0.1456220230513298 | T | T | T |
| 0.3894427675586512 | 0.9519210360704272  | 0.2447265530144065 | T | T | T |

```
0.0619687466766987 0.6436742552792930 0.2173152844142565 T T T
0.8559296523973982 0.8839519712792553 0.1936138877267705 T T T
0.5978371349201463 0.6050882753074152 0.1709510204913924 T T T
-0.1172631478976279 -0.0328151451668470 0.2951064412269214 T T T
0.0667563703483702 0.9697653848758621 0.2973279151701939 T T T
```

The calculations have been performed with VASP with PAW pseudopotentials and with the following parameters: <sup>1-5</sup>

#### INCAR

```
ALGO = Fast
IALGO = 38
ISTART=1
ICHARG=0
EDIFF = 2e-06
ENCUT = 520
IBRION = 2
ISIF = 2
ISMEAR = 0
ISPIN = 2
LREAL = Auto
LWAVE = True
NELM = 100
NELMIN = 3
NCORE = 8
KPAR = 8
PREC = Accurate
SIGMA = 0.2
NSW=1000
```

#### KPOINTS

```
Regular 2 x 2 x 2 mesh centered at Gamma
0
Gamma
2 2 2
```

#### References

- [1] G. Kresse and J. Hafner, Phys. Rev. B 47, 558 (1993); *ibid.* 49, 14 251 (1994).
- [2] G. Kresse and J. Furthmüller, Comput. Mat. Sci. 6, 15 (1996).
- [3] G. Kresse and J. Furthmüller, Phys. Rev. B 54, 11 169 (1996).
- [4] G. Kresse and J. Hafner, J. Phys.: Condens. Matt. 6, 8245 (1994).
- [5] G. Kresse and D. Joubert, Phys. Rev. 59, 1758 (1999).
